# Supplementary material for: Synthesis of N-acylbenzimidazoles through [4 + 1] annulation of N-arylpivalimidamides with dioxazolones
Source: Royal Society of Chemistry journal article supplement (doi:10.1039/d1qo01137e), 2021-01-01
Supplement: d1qo01137e1.pdf [file d1qo01137e1.pdf]

## Supporting Information

### Synthesis of *N*-Acylbenzimidazoles through [4 + 1] Annulation of *N*-Arylpivalimidamides with Dioxazolones

Xia Song<sup>†</sup>, Xinyuan Cai<sup>‡</sup>, Xinying Zhang<sup>‡\*</sup>, Xuesen Fan<sup>‡\*</sup>

<sup>†</sup>*School of Environment, Key Laboratory for Yellow River and Huai River Water Environmental Pollution Control, Ministry of Education, Henan Normal University, Xinxiang, Henan 453007, China*

<sup>‡</sup>*NMPA Key Laboratory for Research and Evaluation of Innovative Drug, Collaborative Innovation Center of Henan Province for Green Manufacturing of Fine Chemicals, Key Laboratory of Green Chemical Media and Reactions, Ministry of Education, School of Chemistry and Chemical Engineering, Henan Normal University, Xinxiang, Henan 453007, China*

*E-mail: xinyingzhang@htu.cn; xuesen.fan@htu.cn*

## Table of Contents

|      |                                                       |         |
|------|-------------------------------------------------------|---------|
| I    | General experimental information                      | S3      |
| II   | Experimental procedures and spectroscopic data        | S4-S18  |
| III  | Mechanism studies                                     | S19-S24 |
| IV   | Copies of NMR spectra of products <b>3a-3mm</b>       | S25-S66 |
| V    | Copies of NMR spectra of products <b>4-7</b>          | S67-S70 |
| VI   | Copies of NMR spectra of intermediate <b>IV</b>       | S71     |
| VII  | X-ray crystal structure and data of product <b>3o</b> | S72-S73 |
| VIII | References                                            | S74     |

## I. General experimental information

Commercial reagents were used without further purification. Amidines (**1**),<sup>[1]</sup> dioxazolones (**2**),<sup>[2]</sup> and  $[\text{RhCp}^*\text{Cl}_2]_2$ <sup>[3]</sup> were prepared based on literature procedures. Melting points were recorded with a micro melting point apparatus and uncorrected. The  $^1\text{H}$  NMR spectra were recorded at 400 MHz or 600 MHz. The  $^{13}\text{C}$  NMR spectra were recorded at 100 MHz or 150 MHz. The  $^{19}\text{F}$  NMR spectra were recorded at 565 MHz. Chemical shifts were expressed in parts per million ( $\delta$ ), and were reported as s (singlet), d (doublet), t (triplet), dd (doublet of doublet), m (multiplet), br s (broad singlet), etc. The coupling constants  $J$  were given in Hz. High resolution mass spectra (HRMS) were obtained *via* ESI mode by using a MicrOTOF mass spectrometer. All reactions were monitored by thin layer chromatography (TLC) using silica gel plates (silica gel 60 F254 0.25 mm), and components were visualized by observation under UV light (254 and 365 nm).

## II. Experimental procedures and spectroscopic data

### 1. Typical procedures for the synthesis of **3a** and spectroscopic data of **3a-3mm**

To a reaction tube equipped with a stir bar were charged with *N*-phenylpivalimidamide (**1a**, 63.5 mg, 0.36 mmol), ethyl acetate (1.5 mL), [RhCp\*Cl<sub>2</sub>]<sub>2</sub> (4.6 mg, 0.0075 mmol), AgSbF<sub>6</sub> (10.3 mg, 0.03 mmol), Zn(OAc)<sub>2</sub> (16.5 mg, 0.09 mmol) and 3-phenyl-1,4,2-dioxazol-5-one (**2a**, 48.9 mg, 0.3 mmol). The tube was then sealed, and the resulting mixture was stirred at 110 °C under air for 10 h. Upon completion, it was cooled to room temperature, quenched with water and extracted with ethyl acetate (10 mL × 3). The combined organic phases were dried over anhydrous Na<sub>2</sub>SO<sub>4</sub>, filtered and concentrated under reduced pressure. The residue was purified by silica gel chromatography using petroleum ether/ethyl acetate (10:1) as eluent to afford **3a** (69.3 mg, 83%). **3b-3mm** were obtained in a similar manner.

#### **(2-(tert-Butyl)-1*H*-benzo[*d*]imidazol-1-yl)(phenyl)methanone (3a)**

Eluent: petroleum ether/ethyl acetate (10:1). White solid (69.3 mg, 83%), mp 142-144 °C. <sup>1</sup>H NMR (CDCl<sub>3</sub>, 400 MHz): δ 7.82 (dd, *J*<sub>1</sub> = 8.4 Hz, *J*<sub>2</sub> = 1.2 Hz, 2H), 7.77 (d, *J* = 8.0 Hz, 1H), 7.73-7.69 (m, 1H), 7.52 (t, *J* = 7.6 Hz, 2H), 7.24-7.20 (m, 1H), 7.05-7.01 (m, 1H), 6.56 (d, *J* = 8.4 Hz, 1H), 1.57 (s, 9H). <sup>13</sup>C{<sup>1</sup>H} NMR (CDCl<sub>3</sub>, 100 MHz): δ 170.8, 163.3, 141.4, 135.4, 134.9, 133.0, 130.9, 129.3, 123.3, 123.1, 119.7, 112.2, 35.4, 29.8. HRMS (ESI) *m/z*: [M+H]<sup>+</sup> Calcd for C<sub>18</sub>H<sub>19</sub>N<sub>2</sub>O 279.1492; Found 279.1509.

#### **(2-(tert-Butyl)-6-methyl-1*H*-benzo[*d*]imidazol-1-yl)(phenyl)methanone (3b)**

Eluent: petroleum ether/ethyl acetate (10:1). White solid (67.5 mg, 77%), mp 130-132 °C. <sup>1</sup>H NMR (CDCl<sub>3</sub>, 600 MHz): δ 7.82 (dd, *J*<sub>1</sub> = 8.4 Hz, *J*<sub>2</sub> = 1.2 Hz, 2H), 7.72-7.69 (m, 1H), 7.63 (d, *J* = 7.8 Hz, 1H), 7.53-7.51 (m, 2H), 7.04 (dd, *J*<sub>1</sub> = 8.4 Hz, *J*<sub>2</sub> = 1.2 Hz, 1H), 6.35 (s, 1H), 2.24 (s, 3H), 1.55 (s, 9H). <sup>13</sup>C{<sup>1</sup>H} NMR (CDCl<sub>3</sub>, 100 MHz): δ 170.9, 162.6, 139.5, 135.7, 134.9, 133.3, 133.0, 130.9, 129.3, 124.5, 119.2, 112.1, 35.4, 29.8, 21.7. HRMS (ESI) *m/z*: [M+H]<sup>+</sup> Calcd for C<sub>19</sub>H<sub>21</sub>N<sub>2</sub>O 293.1648; Found 293.1649.

**(2-(*tert*-Butyl)-6-methoxy-1*H*-benzo[*d*]imidazol-1-yl)(phenyl)methanone (3c)**

Eluent: petroleum ether/ethyl acetate (10:1). White solid (68.5 mg, 74%), mp 99-101 °C. <sup>1</sup>H NMR (CDCl<sub>3</sub>, 600 MHz): δ 7.82 (dd, *J*<sub>1</sub> = 8.4 Hz, *J*<sub>2</sub> = 1.2 Hz, 2H), 7.72-7.69 (m, 1H), 7.64 (d, *J* = 9.0 Hz, 1H), 7.54-7.51 (m, 2H), 6.84 (dd, *J*<sub>1</sub> = 9.0 Hz, *J*<sub>2</sub> = 2.4 Hz, 1H), 6.03 (d, *J* = 2.4 Hz, 1H), 3.56 (s, 3H), 1.55 (s, 9H). <sup>13</sup>C{<sup>1</sup>H} NMR (CDCl<sub>3</sub>, 150 MHz): δ 170.8, 162.3, 156.5, 136.0, 134.9, 132.9, 130.9, 129.3, 120.0, 111.3, 97.0, 55.6, 35.4, 29.8. HRMS (ESI) *m/z*: [M+H]<sup>+</sup> Calcd for C<sub>19</sub>H<sub>21</sub>N<sub>2</sub>O<sub>2</sub> 309.1598; Found 309.1599.

**(2-(*tert*-Butyl)-6-isopropyl-1*H*-benzo[*d*]imidazol-1-yl)(phenyl)methanone (3d)**

Eluent: petroleum ether/ethyl acetate (10:1). White solid (84.1 mg, 88%), mp 101-103 °C. <sup>1</sup>H NMR (CDCl<sub>3</sub>, 600 MHz): δ 7.83 (d, *J*<sub>1</sub> = 8.4 Hz, *J*<sub>2</sub> = 1.2, 2H), 7.71-7.68 (m, 1H), 7.67 (d, *J* = 8.4 Hz, 1H), 7.52 (t, *J* = 8.4 Hz, 2H), 7.10 (dd, *J*<sub>1</sub> = 8.4 Hz, *J*<sub>2</sub> = 1.2, 1H), 6.35 (d, *J* = 1.2 Hz, 1H), 2.79-2.75 (m, 1H), 1.56 (s, 9H), 1.05 (d, *J* = 6.6 Hz, 6H). <sup>13</sup>C{<sup>1</sup>H} NMR (CDCl<sub>3</sub>, 150 MHz): δ 170.9, 162.9, 144.5, 139.8, 135.6, 134.8, 133.2, 130.9, 129.2, 122.1, 119.3, 109.8, 35.4, 34.2, 29.8, 24.2. HRMS (ESI) *m/z*: [M+H]<sup>+</sup> Calcd for C<sub>21</sub>H<sub>25</sub>N<sub>2</sub>O 321.1961; Found 321.1967.

**(2-(*tert*-Butyl)-6-fluoro-1*H*-benzo[*d*]imidazol-1-yl)(phenyl)methanone (3e)**

Eluent: petroleum ether/ethyl acetate (10:1). White solid (55.1 mg, 62%), mp 129-131 °C. <sup>1</sup>H NMR (CDCl<sub>3</sub>, 600 MHz): δ 7.81 (dd, *J*<sub>1</sub> = 8.4 Hz, *J*<sub>2</sub> = 1.2 Hz, 2H), 7.75-7.72 (m, 1H), 7.69-7.67 (m, 1H), 7.56-7.53 (m, 2H), 6.98-6.95 (m, 1H), 6.25 (dd, *J*<sub>1</sub> = 9.0 Hz, *J*<sub>2</sub> = 2.4 Hz, 1H), 1.56 (s, 9H). <sup>13</sup>C{<sup>1</sup>H} NMR (CDCl<sub>3</sub>, 100 MHz): δ 170.3, 163.8 (d, <sup>4</sup>*J*<sub>C-F</sub> = 3.6 Hz), 159.5 (d, <sup>1</sup>*J*<sub>C-F</sub> = 239.8 Hz), 137.8, 135.4 (d, <sup>3</sup>*J*<sub>C-F</sub> = 13.0 Hz), 135.2, 132.4, 130.9, 129.5, 120.4 (d, <sup>3</sup>*J*<sub>C-F</sub> = 9.4 Hz), 111.3 (d, <sup>2</sup>*J*<sub>C-F</sub> = 24.5 Hz), 99.3 (d, <sup>2</sup>*J*<sub>C-F</sub> = 28.1 Hz), 35.5, 29.7. <sup>19</sup>F NMR (CDCl<sub>3</sub>, 565 MHz): δ -117.60--117.64 (m). HRMS (ESI) *m/z*: [M+H]<sup>+</sup> Calcd for C<sub>18</sub>H<sub>18</sub>FN<sub>2</sub>O 297.1398; Found 297.1401.

**(2-(*tert*-Butyl)-6-chloro-1*H*-benzo[*d*]imidazol-1-yl)(phenyl)methanone (3f)**

Eluent: petroleum ether/ethyl acetate (10:1). White solid (71.3 mg, 76%), mp 136-138 °C. <sup>1</sup>H NMR (CDCl<sub>3</sub>, 600 MHz): δ 7.82-7.80 (m, 2H), 7.75-7.72 (m, 1H), 7.67 (d, *J* = 8.4 Hz, 1H), 7.56-7.53 (m, 2H), 7.20 (dd, *J*<sub>1</sub> = 9.0 Hz, *J*<sub>2</sub> = 2.4 Hz, 1H), 6.57 (d, *J* = 1.8 Hz, 1H), 1.55 (s, 9H). <sup>13</sup>C{<sup>1</sup>H} NMR (CDCl<sub>3</sub>, 100 MHz): δ 170.2, 164.0, 140.1, 135.9, 135.4, 132.3, 130.9, 129.5, 128.9, 123.8, 120.5, 112.1, 35.5, 29.7. HRMS (ESI) *m/z*: [M+H]<sup>+</sup> Calcd for C<sub>18</sub>H<sub>18</sub>ClN<sub>2</sub>O 313.1102; Found 313.1104.

**(6-Bromo-2-(*tert*-butyl)-1*H*-benzo[*d*]imidazol-1-yl)(phenyl)methanone (3g)**

Eluent: petroleum ether/ethyl acetate (10:1). White solid (75.0 mg, 70%), mp 163-165 °C. <sup>1</sup>H NMR (CDCl<sub>3</sub>, 400 MHz): δ 7.82-7.80 (m, 2H), 7.74 (t, *J* = 7.6 Hz, 1H), 7.62 (d, *J* = 8.4 Hz, 1H), 7.55 (t, *J* = 8.0 Hz, 2H), 7.34 (dd, *J*<sub>1</sub> = 8.8 Hz, *J*<sub>2</sub> = 2.0 Hz, 1H), 6.73 (d, *J* = 1.6 Hz, 1H), 1.55 (s, 9H). <sup>13</sup>C{<sup>1</sup>H} NMR (CDCl<sub>3</sub>, 100 MHz): δ 170.2, 163.8, 140.5, 136.4, 135.4, 132.3, 131.0, 129.5, 126.5, 121.0, 116.4, 114.9, 35.5, 29.7. HRMS (ESI) *m/z*: [M+H]<sup>+</sup> Calcd for C<sub>18</sub>H<sub>18</sub>BrN<sub>2</sub>O 357.0597; Found 357.0585.

**(2-(*tert*-Butyl)-6-iodo-1*H*-benzo[*d*]imidazol-1-yl)(phenyl)methanone (3h)**

Eluent: petroleum ether/ethyl acetate (10:1). White solid (75.2 mg, 62%), mp 179-180 °C. <sup>1</sup>H NMR (CDCl<sub>3</sub>, 600 MHz): δ 7.80 (dd, *J*<sub>1</sub> = 8.4 Hz, *J*<sub>2</sub> = 1.2 Hz, 2H), 7.76-7.73 (m, 1H), 7.57-7.52 (m, 4H), 6.92 (s, 1H), 1.54 (s, 9H). <sup>13</sup>C{<sup>1</sup>H} NMR (CDCl<sub>3</sub>, 100 MHz): δ 170.2, 163.6, 141.0, 136.8, 135.4, 132.3, 132.2, 131.0, 129.5, 121.4, 120.8, 86.7, 35.4, 29.7. HRMS (ESI) *m/z*: [M+H]<sup>+</sup> Calcd for C<sub>18</sub>H<sub>18</sub>IN<sub>2</sub>O 405.0458; Found 405.0454.

**(2-(*tert*-Butyl)-6-nitro-1*H*-benzo[*d*]imidazol-1-yl)(phenyl)methanone (3i)**

Eluent: petroleum ether/ethyl acetate (10:1). White solid (42 mg, 43%), mp 158-160 °C. <sup>1</sup>H NMR (CDCl<sub>3</sub>, 600 MHz): δ 8.18 (dd, *J*<sub>1</sub> = 9.0 Hz, *J*<sub>2</sub> = 2.4 Hz, 1H), 7.84-7.82 (m, 3H), 7.79 (t, *J* = 7.8 Hz, 1H), 7.60-7.56 (m, 3H), 1.57 (s, 9H). <sup>13</sup>C{<sup>1</sup>H} NMR (CDCl<sub>3</sub>, 150 MHz): δ 169.6, 168.1, 145.9, 143.8, 136.0, 134.8, 131.8, 131.1, 129.8, 119.8, 119.0, 108.4, 35.9, 29.6. HRMS (ESI) *m/z*: [M+H]<sup>+</sup> Calcd for C<sub>18</sub>H<sub>18</sub>N<sub>3</sub>O<sub>3</sub> 324.1343; Found 324.1334.

**(2-(*tert*-Butyl)-6-phenyl-1*H*-benzo[*d*]imidazol-1-yl)(phenyl)methanone (3j)**

Eluent: petroleum ether/ethyl acetate (10:1). White solid (65.9 mg, 62%), mp 213-216 °C. <sup>1</sup>H NMR (CDCl<sub>3</sub>, 600 MHz): δ 7.87-7.85 (m, 2H), 7.81 (d, *J* = 8.4 Hz, 1H), 7.72 (t, *J* = 7.8 Hz, 1H), 7.53 (t, *J* = 8.4 Hz, 2H), 7.46 (dd, *J*<sub>1</sub> = 8.4 Hz, *J*<sub>2</sub> = 1.8 Hz, 1H), 7.34-7.30 (m, 4H), 7.27-7.24 (m, 1H), 6.74 (d, *J* = 1.2 Hz, 1H), 1.58 (s, 9H). <sup>13</sup>C{<sup>1</sup>H} NMR (CDCl<sub>3</sub>, 150 MHz): δ 170.7, 163.7, 141.4, 140.9, 137.0, 136.0, 135.1, 132.9, 131.0, 129.4, 128.7, 127.3, 127.0, 123.0, 119.8, 110.7, 35.5, 29.8. HRMS (ESI) *m/z*: [M+H]<sup>+</sup> Calcd for C<sub>24</sub>H<sub>23</sub>N<sub>2</sub>O 355.1805; Found 355.1797.

**(2-(*tert*-Butyl)-5-methyl-1*H*-benzo[*d*]imidazol-1-yl)(phenyl)methanone (3k)**

Eluent: petroleum ether/ethyl acetate (10:1). White solid (70.2 mg, 80%), mp 147-149 °C. <sup>1</sup>H NMR (CDCl<sub>3</sub>, 400 MHz): δ 7.82-7.80 (m, 2H), 7.69 (t, *J* = 7.6 Hz, 1H), 7.55 (s, 1H), 7.55-7.49 (m, 2H), 6.84 (dd, *J*<sub>1</sub> = 8.4 Hz, *J*<sub>2</sub> = 0.8 Hz, 1H), 6.41 (d, *J* = 8.4 Hz, 1H), 2.40 (s, 3H), 1.57 (s, 9H). <sup>13</sup>C{<sup>1</sup>H} NMR (CDCl<sub>3</sub>, 100 MHz): δ 170.7, 163.3, 141.7, 134.8, 133.5, 133.1, 132.8, 130.9, 129.2, 124.5, 119.6, 111.8, 35.4, 29.7, 21.4. HRMS (ESI) *m/z*: [M+H]<sup>+</sup> Calcd for C<sub>19</sub>H<sub>21</sub>N<sub>2</sub>O 293.1648; Found 293.1635.

**(2-(*tert*-Butyl)-5-chloro-1*H*-benzo[*d*]imidazol-1-yl)(phenyl)methanone (3l)**

Eluent: petroleum ether/ethyl acetate (10:1). White solid (74.1 mg, 79%), mp 167-169 °C. <sup>1</sup>H NMR (CDCl<sub>3</sub>, 600 MHz): δ 7.80 (dd, *J*<sub>1</sub> = 8.4 Hz, *J*<sub>2</sub> = 1.2 Hz, 2H), 7.74-7.73 (m, 1H), 7.72-7.71 (m, 1H), 7.54-7.52 (m, 2H), 6.99 (dd, *J*<sub>1</sub> = 9.0 Hz, *J*<sub>2</sub> = 2.4 Hz, 1H), 6.47 (d, *J* = 8.4 Hz, 1H), 1.56 (s, 9H). <sup>13</sup>C{<sup>1</sup>H} NMR (CDCl<sub>3</sub>, 100 MHz): δ 170.2, 164.6, 142.4, 135.2, 134.0, 132.6, 130.9, 129.4, 128.7, 123.6, 119.6, 112.8, 35.5, 29.6. HRMS (ESI) *m/z*: [M+H]<sup>+</sup> Calcd for C<sub>18</sub>H<sub>18</sub>ClN<sub>2</sub>O 313.1102; Found 313.1101.

**(2-(*tert*-Butyl)-4-methyl-1*H*-benzo[*d*]imidazol-1-yl)(phenyl)methanone (3m)**

Eluent: petroleum ether/ethyl acetate (10:1). White solid (75.4 mg, 86%), mp 135-136 °C. <sup>1</sup>H NMR (CDCl<sub>3</sub>, 400 MHz): δ 7.86 (d, *J* = 7.6 Hz, 2H), 7.73 (t, *J* = 7.6 Hz, 1H), 7.55 (t, *J* = 8.0 Hz, 2H), 7.06 (d, *J* = 7.6 Hz,

1H), 6.95 (t,  $J = 8.0$  Hz, 1H), 6.41 (d,  $J = 8.4$  Hz, 1H), 2.72 (s, 3H), 1.62 (s, 9H).  $^{13}\text{C}\{^1\text{H}\}$  NMR ( $\text{CDCl}_3$ , 100 MHz):  $\delta$  171.0, 162.2, 140.8, 135.2, 134.7, 133.2, 130.9, 129.9, 129.2, 123.4, 123.0, 109.6, 35.5, 29.8, 16.7. HRMS (ESI)  $m/z$ :  $[\text{M}+\text{H}]^+$  Calcd for  $\text{C}_{19}\text{H}_{21}\text{N}_2\text{O}$  293.1648; Found 293.1648.

**(2-(*tert*-Butyl)-4-chloro-1*H*-benzo[*d*]imidazol-1-yl)(phenyl)methanone (3n)**

Eluent: petroleum ether/ethyl acetate (10:1). White solid (81.6 mg, 87%), mp 143-145 °C.  $^1\text{H}$  NMR ( $\text{CDCl}_3$ , 600 MHz):  $\delta$  7.80-7.78 (m, 2H), 7.73-7.70 (m, 1H), 7.53-7.51 (m, 2H), 7.23 (dd,  $J_1 = 7.8$  Hz,  $J_2 = 0.6$  Hz, 1H), 6.95 (t,  $J = 8.4$  Hz, 1H), 6.49 (dd,  $J_1 = 8.4$  Hz,  $J_2 = 1.2$  Hz, 1H), 1.57 (s, 9H).  $^{13}\text{C}\{^1\text{H}\}$  NMR ( $\text{CDCl}_3$ , 100 MHz):  $\delta$  170.3, 163.7, 138.9, 136.4, 135.2, 132.5, 131.0, 129.4, 124.7, 123.7, 123.0, 110.6, 35.6, 29.7. HRMS (ESI)  $m/z$ :  $[\text{M}+\text{H}]^+$  Calcd for  $\text{C}_{18}\text{H}_{18}\text{ClN}_2\text{O}$  313.1102; Found 313.1106.

**(2-(*tert*-Butyl)-1*H*-benzo[*d*]imidazol-1-yl)(*p*-tolyl)methanone (3o)**

Eluent: petroleum ether/ethyl acetate (10:1). White solid (64.9 mg, 74%), mp 120-122 °C.  $^1\text{H}$  NMR ( $\text{CDCl}_3$ , 600 MHz):  $\delta$  7.76 (d,  $J = 7.8$  Hz, 1H), 7.72 (d,  $J = 7.8$  Hz, 2H), 7.31 (d,  $J = 7.8$  Hz, 2H), 7.22 (t,  $J = 7.8$  Hz, 1H), 7.05-7.02 (m, 1H), 6.62 (d,  $J = 8.4$  Hz, 1H), 2.47 (s, 3H), 1.56 (s, 9H).  $^{13}\text{C}\{^1\text{H}\}$  NMR ( $\text{CDCl}_3$ , 150 MHz):  $\delta$  170.6, 163.1, 146.4, 141.4, 135.5, 131.1, 130.2, 130.0, 123.2, 123.0, 119.7, 112.1, 35.4, 29.8, 21.9. HRMS (ESI)  $m/z$ :  $[\text{M}+\text{H}]^+$  Calcd for  $\text{C}_{19}\text{H}_{21}\text{N}_2\text{O}$  293.1648; Found 293.1643.

**(2-(*tert*-Butyl)-1*H*-benzo[*d*]imidazol-1-yl)(4-methoxyphenyl)methanone (3p)<sup>[4]</sup>**

Eluent: petroleum ether/ethyl acetate (10:1). White solid (75.9 mg, 82%), mp 151-153 °C.  $^1\text{H}$  NMR ( $\text{CDCl}_3$ , 600 MHz):  $\delta$  7.80-7.78 (m, 2H), 7.77 (d,  $J = 8.4$  Hz, 1H), 7.23-7.20 (m, 1H), 7.07-7.04 (m, 1H), 6.98-6.95 (m, 2H), 6.69 (d,  $J = 7.8$  Hz, 1H), 3.90 (s, 3H), 1.55 (s, 9H).  $^{13}\text{C}\{^1\text{H}\}$  NMR ( $\text{CDCl}_3$ , 150 MHz):  $\delta$  169.9, 165.2, 163.0, 141.3, 135.7, 133.6, 125.0, 123.1, 122.9, 119.6, 114.6, 111.9, 55.7, 35.3, 29.8. HRMS (ESI)  $m/z$ :  $[\text{M}+\text{H}]^+$  Calcd for  $\text{C}_{19}\text{H}_{21}\text{N}_2\text{O}_2$  309.1598; Found 309.1590.

**(2-(*tert*-Butyl)-1*H*-benzo[*d*]imidazol-1-yl)(4-(*tert*-butyl)phenyl)methanone (3q)**



Eluent: petroleum ether/ethyl acetate (10:1). White solid (56.2 mg, 56%), mp 165-167 °C. <sup>1</sup>H NMR (CDCl<sub>3</sub>, 600 MHz): δ 7.78-7.74 (m, 3H), 7.52-7.50 (m, 2H), 7.23-7.21 (m, 1H), 7.06-7.03 (m, 1H), 6.64 (d, *J* = 7.8 Hz, 1H), 1.56 (s, 9H), 1.37 (s, 9H). <sup>13</sup>C{<sup>1</sup>H} NMR (CDCl<sub>3</sub>, 100 MHz): δ 170.6, 163.1, 159.3, 141.4, 135.6, 131.0, 130.0, 126.3, 123.2, 122.9, 119.6, 112.1, 35.5, 35.4, 31.0, 29.8. HRMS (ESI) *m/z*: [M+H]<sup>+</sup> Calcd for C<sub>22</sub>H<sub>27</sub>N<sub>2</sub>O 335.2118; Found 335.2118.

**(2-(*tert*-Butyl)-1*H*-benzo[*d*]imidazol-1-yl)(4-fluorophenyl)methanone (3r)**

Eluent: petroleum ether/ethyl acetate (10:1). White solid (68.0 mg, 76%), mp 124-126 °C. <sup>1</sup>H NMR (CDCl<sub>3</sub>, 400 MHz): δ 7.88-7.84 (m, 2H), 7.77 (d, *J* = 8.0 Hz, 1H), 7.25-7.17 (m, 3H), 7.08-7.03 (m, 1H), 6.59 (d, *J* = 8.0 Hz, 1H), 1.56 (s, 9H). <sup>13</sup>C{<sup>1</sup>H} NMR (CDCl<sub>3</sub>, 100 MHz): δ 169.5, 166.8 (d, <sup>1</sup>*J*<sub>C-F</sub> = 257.1 Hz), 163.1, 141.5, 135.3, 133.8 (d, <sup>3</sup>*J*<sub>C-F</sub> = 9.3 Hz), 129.2 (d, <sup>4</sup>*J*<sub>C-F</sub> = 2.8 Hz), 123.4, 123.2, 119.9, 116.7 (d, <sup>2</sup>*J*<sub>C-F</sub> = 22.4 Hz), 111.9, 35.4, 29.7. <sup>19</sup>F NMR (CDCl<sub>3</sub>, 565 MHz): δ -101.0--101.1 (m). HRMS (ESI) *m/z*: [M+H]<sup>+</sup> Calcd for C<sub>18</sub>H<sub>18</sub>FN<sub>2</sub>O 297.1398; Found 297.1398.

**(2-(*tert*-Butyl)-1*H*-benzo[*d*]imidazol-1-yl)(4-chlorophenyl)methanone (3s)**

Eluent: petroleum ether/ethyl acetate (10:1). White solid (69.4 mg, 74%), mp 144-146 °C. <sup>1</sup>H NMR (CDCl<sub>3</sub>, 600 MHz): δ 7.77-7.75 (m, 3H), 7.51-7.48 (m, 2H), 7.25-7.22 (m, 1H), 7.07-7.04 (m, 1H), 6.58 (d, *J* = 7.8 Hz, 1H), 1.56 (s, 9H). <sup>13</sup>C{<sup>1</sup>H} NMR (CDCl<sub>3</sub>, 150 MHz): δ 169.7, 163.2, 141.7, 141.4, 135.2, 132.3, 131.2, 129.8, 123.5, 123.3, 119.9, 112.0, 35.4, 29.7. HRMS (ESI) *m/z*: [M+H]<sup>+</sup> Calcd for C<sub>18</sub>H<sub>18</sub>ClN<sub>2</sub>O 313.1102; Found 313.1091.

**(4-Bromophenyl)(2-(*tert*-butyl)-1*H*-benzo[*d*]imidazol-1-yl)methanone (3t)**

Eluent: petroleum ether/ethyl acetate (10:1). White solid (69.7 mg, 65%), mp 153-154 °C. <sup>1</sup>H NMR (CDCl<sub>3</sub>, 400 MHz): δ 7.77 (d, *J* = 8.0 Hz, 1H), 7.70-7.65 (m, 4H), 7.26-7.22 (m, 1H), 7.08-7.04 (m, 1H), 6.58 (d, *J* = 8.0 Hz, 1H), 1.56 (s, 9H). <sup>13</sup>C{<sup>1</sup>H} NMR (CDCl<sub>3</sub>, 150 MHz): δ 169.9, 163.2, 141.4, 135.2, 132.8, 132.3, 131.7,

130.5, 123.5, 123.3, 119.9, 112.0, 35.4, 29.7. HRMS (ESI)  $m/z$ :  $[M+H]^+$  Calcd for  $C_{18}H_{18}BrN_2O$  357.0597; Found 357.0592.

**(2-(*tert*-Butyl)-1*H*-benzo[*d*]imidazol-1-yl)(4-iodophenyl)methanone (3u)**

Eluent: petroleum ether/ethyl acetate (10:1). White solid (57.0 mg, 47%), mp 180-182 °C.  $^1H$  NMR ( $CDCl_3$ , 400 MHz):  $\delta$  7.89 (d,  $J = 8.4$  Hz, 2H), 7.77 (d,  $J = 8.0$  Hz, 1H), 7.52 (d,  $J = 8.4$  Hz, 2H), 7.24 (t,  $J = 7.6$  Hz, 1H), 7.06 (t,  $J = 7.6$  Hz, 1H), 6.58 (d,  $J = 8.4$  Hz, 1H), 1.55 (s, 9H).  $^{13}C\{^1H\}$  NMR ( $CDCl_3$ , 100 MHz):  $\delta$  170.2, 163.2, 141.4, 138.8, 135.2, 132.3, 132.0, 123.5, 123.3, 119.9, 112.0, 103.6, 35.4, 29.7. HRMS (ESI)  $m/z$ :  $[M+H]^+$  Calcd for  $C_{18}H_{18}IN_2O$  405.0458; Found 405.0451.

**(2-(*tert*-Butyl)-1*H*-benzo[*d*]imidazol-1-yl)(4-(trifluoromethyl)phenyl)methanone (3v)**

Eluent: petroleum ether/ethyl acetate (10:1). White solid (70.7 mg, 68%), mp 165-168 °C.  $^1H$  NMR ( $CDCl_3$ , 400 MHz):  $\delta$  7.99 (d,  $J = 8.0$  Hz, 2H), 7.85-7.81 (m, 3H), 7.31-7.27 (m, 1H), 7.11-7.07 (m, 1H), 6.53 (d,  $J = 8.0$  Hz, 1H), 1.62 (s, 9H).  $^{13}C\{^1H\}$  NMR ( $CDCl_3$ , 150 MHz):  $\delta$  169.6, 163.3, 141.5, 136.08, 136.05 (q,  $^2J_{C-F} = 32.9$  Hz), 135.0, 131.2, 126.4 (q,  $^3J_{C-F} = 3.3$  Hz), 123.6, 123.5, 123.3 (q,  $^1J_{C-F} = 271.2$  Hz), 120.0, 112.1, 35.5, 29.7.  $^{19}F$  NMR ( $CDCl_3$ , 565 MHz):  $\delta$  -63,27 (s). HRMS (ESI)  $m/z$ :  $[M+H]^+$  Calcd for  $C_{19}H_{18}F_3N_2O$  347.1366; Found 347.1368.

**[1,1'-Biphenyl]-4-yl(2-(*tert*-butyl)-1*H*-benzo[*d*]imidazol-1-yl)methanone (3w)**

Eluent: petroleum ether/ethyl acetate (10:1). White solid (59.5 mg, 56%), mp 153-155 °C.  $^1H$  NMR ( $CDCl_3$ , 600 MHz):  $\delta$  7.89 (dt,  $J_1 = 9.0$  Hz,  $J_2 = 2.4$  Hz, 2H), 7.78 (d,  $J = 8.4$  Hz, 1H), 7.73-7.72 (m, 2H), 7.65-7.64 (m, 2H), 7.49-7.47 (m, 2H), 7.44-7.41 (m, 1H), 7.24-7.22 (m, 1H), 7.07-7.04 (m, 1H), 6.68 (d,  $J = 7.8$  Hz, 1H), 1.59 (s, 9H).  $^{13}C\{^1H\}$  NMR ( $CDCl_3$ , 150 MHz):  $\delta$  170.5, 163.2, 147.8, 141.5, 139.2, 135.5, 131.6, 131.4, 129.2, 128.8, 127.9, 127.4, 123.3, 123.1, 119.7, 112.2, 35.5, 29.8. HRMS (ESI)  $m/z$ :  $[M+H]^+$  Calcd for  $C_{24}H_{23}N_2O$  355.1805; Found 355.1806.

**(2-(*tert*-Butyl)-1*H*-benzo[*d*]imidazol-1-yl)(*m*-tolyl)methanone (3x)**

Eluent: petroleum ether/ethyl acetate (10:1). White solid (69.3 mg, 79%), mp 135-136 °C. <sup>1</sup>H NMR (CDCl<sub>3</sub>, 400 MHz): δ 7.76 (d, *J* = 8.0 Hz, 1H), 7.68 (s, 1H), 7.55 (d, *J* = 7.6 Hz, 1H), 7.49 (d, *J* = 8.0 Hz, 1H), 7.36 (t, *J* = 7.6 Hz, 1H), 7.22-7.19 (m, 1H), 7.04-7.00 (m, 1H), 6.58 (d, *J* = 8.4 Hz, 1H), 2.40 (s, 3H), 1.57 (s, 9H). <sup>13</sup>C{<sup>1</sup>H} NMR (CDCl<sub>3</sub>, 150 MHz): δ 170.9, 163.3, 141.4, 139.4, 135.8, 135.5, 133.0, 131.2, 129.1, 128.2, 123.2, 123.0, 119.7, 112.2, 35.4, 29.8, 21.3. HRMS (ESI) *m/z*: [M+H]<sup>+</sup> Calcd for C<sub>19</sub>H<sub>21</sub>N<sub>2</sub>O 293.1648; Found 293.1646.

**(2-(*tert*-Butyl)-1*H*-benzo[*d*]imidazol-1-yl)(3-chlorophenyl)methanone (3y)**

Eluent: petroleum ether/ethyl acetate (10:1). White solid (62.9 mg, 67%), mp 156-158 °C. <sup>1</sup>H NMR (CDCl<sub>3</sub>, 400 MHz): δ 7.87 (t, *J* = 1.6 Hz, 1H), 7.77 (d, *J* = 8.0 Hz, 1H), 7.69-7.66 (m, 1H), 7.65-7.62 (m, 1H), 7.45 (t, *J* = 8.0 Hz, 1H), 7.26-7.22 (m, 1H), 7.08-7.04 (m, 1H), 6.56 (d, *J* = 8.0 Hz, 1H), 1.57 (s, 9H). <sup>13</sup>C{<sup>1</sup>H} NMR (CDCl<sub>3</sub>, 100 MHz): δ 169.5, 163.3, 141.5, 135.7, 135.1, 134.9, 134.7, 130.58, 130.57, 128.9, 123.5, 123.4, 119.9, 112.1, 35.5, 29.7. HRMS (ESI) *m/z*: [M+H]<sup>+</sup> Calcd for C<sub>18</sub>H<sub>18</sub>ClN<sub>2</sub>O 313.1102; Found 313.1100.

**(2-(*tert*-Butyl)-1*H*-benzo[*d*]imidazol-1-yl)(*o*-tolyl)methanone (3z)**

Eluent: petroleum ether/ethyl acetate (10:1). White solid (41.2 mg, 47%), mp 123-126 °C. <sup>1</sup>H NMR (CDCl<sub>3</sub>, 600 MHz): δ 7.73 (d, *J* = 8.4 Hz, 1H), 7.54-7.51 (m, 1H), 7.41 (d, *J* = 7.8 Hz, 1H), 7.37 (dd, *J*<sub>1</sub> = 7.8 Hz, *J*<sub>2</sub> = 0.6 Hz, 1H), 7.24 (t, *J* = 7.8 Hz, 1H), 7.21-7.18 (m, 1H), 6.98-6.95 (m, 1H), 6.27 (d, *J* = 8.4 Hz, 1H), 2.54 (s, 3H), 1.63 (s, 9H). <sup>13</sup>C{<sup>1</sup>H} NMR (CDCl<sub>3</sub>, 150 MHz): δ 170.2, 163.5, 141.6, 140.0, 134.8, 133.30, 133.25, 132.2, 130.8, 126.6, 123.5, 123.3, 119.8, 112.3, 35.8, 29.7, 20.4. HRMS (ESI) *m/z*: [M+H]<sup>+</sup> Calcd for C<sub>19</sub>H<sub>21</sub>N<sub>2</sub>O 293.1648; Found 293.1646.

**(2-Bromophenyl)(2-(*tert*-butyl)-1*H*-benzo[*d*]imidazol-1-yl)methanone (3aa)**

Eluent: petroleum ether/ethyl acetate (10:1). White solid (47.1 mg, 44%), mp 138-139 °C. <sup>1</sup>H NMR (CDCl<sub>3</sub>, 400 MHz): δ 7.74-7.71 (m, 2H), 7.57-7.54 (m, 1H), 7.50-7.45 (m, 2H), 7.24-7.19 (m, 1H), 6.99-6.95 (m, 1H), 6.18 (d, *J* = 8.4 Hz, 1H), 1.66 (s, 9H). <sup>13</sup>C{<sup>1</sup>H} NMR (CDCl<sub>3</sub>, 100 MHz): δ 167.6, 163.4, 141.8, 136.0, 134.6, 134.3, 133.7, 131.3, 128.2, 123.9, 123.8, 121.4, 120.1, 112.4, 36.0, 29.4. HRMS (ESI) *m/z*: [M+H]<sup>+</sup> Calcd for C<sub>18</sub>H<sub>18</sub>BrN<sub>2</sub>O 357.0597; Found 357.0606.

**Benzo[*d*][1,3]dioxol-4-yl(2-(*tert*-butyl)-1*H*-benzo[*d*]imidazol-1-yl)methanone (3bb)**

Eluent: petroleum ether/ethyl acetate (10:1). White solid (74.5 mg, 77%), mp 186-188 °C. <sup>1</sup>H NMR (CDCl<sub>3</sub>, 600 MHz): δ 7.77 (d, *J* = 8.4 Hz, 1H), 7.37 (dd, *J*<sub>1</sub> = 8.4 Hz, *J*<sub>2</sub> = 1.8 Hz, 1H), 7.32 (d, *J* = 1.8 Hz, 1H), 7.24-7.22 (m, 1H), 7.09-7.07 (m, 1H), 6.86 (d, *J* = 8.4 Hz, 1H), 6.74 (d, *J* = 8.4 Hz, 1H), 6.11 (s, 2H), 1.55 (s, 9H). <sup>13</sup>C{<sup>1</sup>H} NMR (CDCl<sub>3</sub>, 150 MHz): δ 169.6, 162.9, 153.7, 148.7, 141.3, 135.6, 128.2, 126.8, 123.2, 123.0, 119.7, 111.9, 110.2, 108.7, 102.5, 35.4, 29.7. HRMS (ESI) *m/z*: [M+H]<sup>+</sup> Calcd for C<sub>19</sub>H<sub>19</sub>N<sub>2</sub>O<sub>3</sub> 323.1390; Found 323.1394.

**(2-(*tert*-Butyl)-1*H*-benzo[*d*]imidazol-1-yl)(naphthalen-1-yl)methanone (3cc)<sup>[4]</sup>**

Eluent: petroleum ether/ethyl acetate (10:1). White solid (53.2 mg, 54%), mp 171-172 °C. <sup>1</sup>H NMR (CDCl<sub>3</sub>, 400 MHz): δ 8.64 (d, *J* = 8.8 Hz, 1H), 8.15 (d, *J* = 8.4 Hz, 1H), 8.00 (d, *J* = 7.6 Hz, 1H), 7.75 (d, *J* = 8.0 Hz, 1H), 7.70-7.65 (m, 3H), 7.45 (t, *J* = 7.6 Hz, 1H), 7.19-7.15 (m, 1H), 6.89-6.85 (m, 1H), 6.27 (d, *J* = 8.0 Hz, 1H), 1.67 (s, 9H). <sup>13</sup>C{<sup>1</sup>H} NMR (CDCl<sub>3</sub>, 100 MHz): δ 169.9, 163.7, 141.5, 135.2, 134.9, 134.2, 131.2, 131.1, 130.3, 128.99, 128.96, 127.2, 125.1, 124.8, 123.4, 123.3, 119.8, 112.6, 35.8, 29.7. HRMS (ESI) *m/z*: [M+H]<sup>+</sup> Calcd for C<sub>22</sub>H<sub>21</sub>N<sub>2</sub>O 329.1648; Found 329.1649.

**(2-(*tert*-Butyl)-1*H*-benzo[*d*]imidazol-1-yl)(thiophen-2-yl)methanone (3dd)**

Eluent: petroleum ether/ethyl acetate (10:1). White solid (67.4 mg, 79%), mp 147-149 °C. <sup>1</sup>H NMR (CDCl<sub>3</sub>, 600 MHz): δ 7.86 (dd, *J*<sub>1</sub> = 4.8 Hz, *J*<sub>2</sub> = 1.2 Hz, 1H), 7.77 (d, *J* = 8.4 Hz, 1H), 7.53 (dd, *J*<sub>1</sub> = 3.6 Hz, *J*<sub>2</sub> = 1.2

Hz, 1H), 7.24 (td,  $J_1 = 7.8$  Hz,  $J_2 = 1.2$  Hz, 1H), 7.15-7.14 (m, 1H), 7.13-7.10 (m, 1H), 6.93 (d,  $J = 8.4$  Hz, 1H), 1.55 (s, 9H).  $^{13}\text{C}\{^1\text{H}\}$  NMR ( $\text{CDCl}_3$ , 150 MHz):  $\delta$  164.2, 162.4, 141.4, 137.7, 137.4, 137.1, 135.8, 128.9, 123.3, 123.1, 119.7, 111.6, 35.4, 29.7. HRMS (ESI)  $m/z$ :  $[\text{M}+\text{H}]^+$  Calcd for  $\text{C}_{16}\text{H}_{17}\text{N}_2\text{OS}$  285.1056; Found 285.1046.

**(2-(*tert*-Butyl)-4-methyl-1*H*-benzo[*d*]imidazol-1-yl)(furan-2-yl)methanone (3ee)**

Eluent: petroleum ether/ethyl acetate (10:1). White solid (55.9 mg, 66%), mp 68-70 °C.  $^1\text{H}$  NMR ( $\text{CDCl}_3$ , 600 MHz):  $\delta$  7.71 (dd,  $J_1 = 1.8$  Hz,  $J_2 = 0.6$  Hz, 1H), 7.21 (dd,  $J_1 = 3.6$  Hz,  $J_2 = 0.6$  Hz, 1H), 7.05-7.00 (m, 2H), 6.66 (d,  $J = 7.8$  Hz, 1H), 6.62 (dd,  $J_1 = 3.6$  Hz,  $J_2 = 1.8$  Hz, 1H), 2.67 (s, 3H), 1.53 (s, 9H).  $^{13}\text{C}\{^1\text{H}\}$  NMR ( $\text{CDCl}_3$ , 150 MHz):  $\delta$  161.4, 159.6, 149.0, 147.6, 140.8, 135.3, 130.0, 123.5, 123.2, 123.1, 113.3, 108.7, 35.4, 29.7, 16.7. HRMS (ESI)  $m/z$ :  $[\text{M}+\text{H}]^+$  Calcd for  $\text{C}_{17}\text{H}_{19}\text{N}_2\text{O}_2$  283.1441; Found 283.1441.

**1-(2-(*tert*-Butyl)-1*H*-benzo[*d*]imidazol-1-yl)ethan-1-one (3ff)**

Eluent: petroleum ether/ethyl acetate (10:1). Colorless liquid (30.5 mg, 47%).  $^1\text{H}$  NMR ( $\text{CDCl}_3$ , 600 MHz):  $\delta$  8.02 (d,  $J = 7.8$  Hz, 1H), 7.97 (d,  $J = 8.4$  Hz, 1H), 7.81-7.78 (m, 1H), 7.54-7.51 (m, 1H), 2.91 (s, 3H), 1.49 (s, 9H).  $^{13}\text{C}\{^1\text{H}\}$  NMR ( $\text{CDCl}_3$ , 150 MHz):  $\delta$  172.7, 167.3, 149.8, 132.9, 129.0, 126.3, 124.7, 122.3, 39.4, 29.6, 21.9. HRMS (ESI)  $m/z$ :  $[\text{M}+\text{Na}]^+$  Calcd for  $\text{C}_{13}\text{H}_{16}\text{N}_2\text{NaO}$  239.1155; Found 239.1159.

**1-(2-(*tert*-Butyl)-1*H*-benzo[*d*]imidazol-1-yl)hexan-1-one (3gg)**

Eluent: petroleum ether/ethyl acetate (10:1). Colorless liquid (25.3 mg, 31%).  $^1\text{H}$  NMR ( $\text{CDCl}_3$ , 600 MHz):  $\delta$  8.06 (d,  $J = 8.4$  Hz, 1H), 7.98 (d,  $J = 8.4$  Hz, 1H), 7.80-7.77 (m, 1H), 7.53-7.50 (m, 1H), 3.24 (t,  $J = 7.8$  Hz, 2H), 1.94-1.89 (m, 2H), 1.51 (s, 9H), 1.46-1.39 (m, 4H), 0.93 (t,  $J = 7.2$  Hz, 3H).  $^{13}\text{C}\{^1\text{H}\}$  NMR ( $\text{CDCl}_3$ , 150 MHz):  $\delta$  172.7, 170.4, 150.1, 132.6, 129.1, 126.1, 124.3, 121.8, 39.5, 34.2, 31.7, 29.6, 28.0, 22.6, 14.1. HRMS (ESI)  $m/z$ :  $[\text{M}+\text{H}]^+$  Calcd for  $\text{C}_{17}\text{H}_{25}\text{N}_2\text{O}$  273.1961; Found 273.1959.

**1-(2-(*tert*-Butyl)-1*H*-benzo[*d*]imidazol-1-yl)-3-cyclohexylpropan-1-one (3hh)**

Eluent: petroleum ether/ethyl acetate (10:1). Colorless liquid (31.9 mg, 34%).  $^1\text{H}$  NMR ( $\text{CDCl}_3$ , 600 MHz):  $\delta$  8.05 (d,  $J = 8.4$  Hz, 1H), 7.97 (d,  $J = 8.4$  Hz, 1H), 7.79-7.77 (m, 1H), 7.52 (t,  $J = 7.8$  Hz, 1H), 3.25 (t,  $J = 7.8$  Hz, 2H), 1.85 (d,  $J = 13.2$  Hz, 2H), 1.79-1.71 (m, 4H), 1.67-1.65 (m, 1H), 1.49 (s, 9H), 1.38-1.33 (m, 1H), 1.27-1.20 (m, 3H), 1.02-0.96 (m, 2H).  $^{13}\text{C}\{^1\text{H}\}$  NMR ( $\text{CDCl}_3$ , 150 MHz):  $\delta$  172.7, 170.8, 150.1, 132.6, 129.1, 126.2, 124.3, 121.7, 39.5, 37.5, 36.0, 33.3, 31.9, 29.6, 26.7, 26.4. HRMS (ESI)  $m/z$ :  $[\text{M}+\text{H}]^+$  Calcd for  $\text{C}_{20}\text{H}_{29}\text{N}_2\text{O}$  313.2274; Found 313.2270.

### **1-(2-(*tert*-Butyl)-1*H*-benzo[*d*]imidazol-1-yl)-4-methylpentan-1-one (3ii)**

Eluent: petroleum ether/ethyl acetate (10:1). Colorless liquid (29.4 mg, 36%).  $^1\text{H}$  NMR ( $\text{CDCl}_3$ , 600 MHz):  $\delta$  8.05 (d,  $J = 8.4$  Hz, 1H), 7.97 (d,  $J = 8.4$  Hz, 1H), 7.80-7.77 (m, 1H), 7.52 (t,  $J = 7.2$  Hz, 1H), 3.25 (t,  $J = 7.8$  Hz, 2H), 1.78 (q,  $J = 7.8$  Hz, 2H), 1.73-1.69 (m, 1H), 1.49 (s, 9H), 1.00 (d,  $J = 6.6$  Hz, 6H).  $^{13}\text{C}\{^1\text{H}\}$  NMR ( $\text{CDCl}_3$ , 150 MHz):  $\delta$  172.7, 170.7, 150.1, 132.6, 129.1, 126.2, 124.3, 121.7, 39.5, 37.4, 29.7, 29.6, 28.0, 22.5. HRMS (ESI)  $m/z$ :  $[\text{M}+\text{H}]^+$  Calcd for  $\text{C}_{17}\text{H}_{25}\text{N}_2\text{O}$  273.1961; Found 273.1960.

### **1-(2-(*tert*-Butyl)-1*H*-benzo[*d*]imidazol-1-yl)-3-phenylpropan-1-one (3jj)**

Eluent: petroleum ether/ethyl acetate (10:1). Colorless liquid (35.8 mg, 39%), mp 44-46 °C.  $^1\text{H}$  NMR ( $\text{CDCl}_3$ , 400 MHz):  $\delta$  8.03 (d,  $J = 7.6$  Hz, 1H), 7.98 (d,  $J = 8.4$  Hz, 1H), 7.81-7.77 (m, 1H), 7.53-7.49 (m, 1H), 7.31-7.27 (m, 4H), 7.22-7.18 (m, 1H), 3.58 (t,  $J = 8.4$  Hz, 2H), 3.28 (t,  $J = 8.4$  Hz, 2H), 1.50 (s, 9H).  $^{13}\text{C}\{^1\text{H}\}$  NMR ( $\text{CDCl}_3$ , 150 MHz):  $\delta$  172.7, 169.0, 150.1, 141.7, 132.7, 129.2, 128.5, 128.4, 126.3, 126.1, 124.1, 121.8, 39.6, 35.8, 33.7, 29.6. HRMS (ESI)  $m/z$ :  $[\text{M}+\text{H}]^+$  Calcd for  $\text{C}_{20}\text{H}_{23}\text{N}_2\text{O}$  307.1805; Found 307.1821.

### **1-(2-(*tert*-Butyl)-1*H*-benzo[*d*]imidazol-1-yl)-3-(*p*-tolyl)propan-1-one (3kk)**

Eluent: petroleum ether/ethyl acetate (10:1). Colorless liquid (36.6 mg, 38%).  $^1\text{H}$  NMR ( $\text{CDCl}_3$ , 600 MHz):  $\delta$  8.01 (d,  $J = 8.4$  Hz, 1H), 7.97 (d,  $J = 8.4$  Hz, 1H), 7.77 (t,  $J = 7.8$  Hz, 1H), 7.49 (t,  $J = 7.8$  Hz, 1H), 7.17 (d,  $J = 7.2$  Hz, 2H), 7.09 (d,  $J = 7.8$  Hz, 2H), 3.54 (t,  $J = 7.8$  Hz, 2H), 3.22 (t,  $J = 8.4$  Hz, 2H), 2.31 (s, 3H), 1.50 (s,

9H).  $^{13}\text{C}\{^1\text{H}\}$  NMR ( $\text{CDCl}_3$ , 150 MHz):  $\delta$  172.7, 169.2, 150.1, 138.7, 135.5, 132.7, 129.1, 128.4, 126.3, 124.1, 121.8, 39.6, 36.1, 33.3, 29.6, 21.0. HRMS (ESI)  $m/z$ :  $[\text{M}+\text{H}]^+$  Calcd for  $\text{C}_{21}\text{H}_{25}\text{N}_2\text{O}$  321.1961; Found 321.1954.

### **1-(2-(*tert*-Butyl)-1*H*-benzo[*d*]imidazol-1-yl)-3-(4-chlorophenyl)propan-1-one (3II)**

Eluent: petroleum ether/ethyl acetate (10:1). Colorless liquid (40.9 mg, 40%).  $^1\text{H}$  NMR ( $\text{CDCl}_3$ , 600 MHz):  $\delta$  8.00-7.97 (m, 2H), 7.80-7.77 (m, 1H), 7.52-7.50 (m, 1H), 7.23 (d,  $J = 8.4$  Hz, 2H), 7.18 (d,  $J = 8.4$  Hz, 2H), 3.54 (t,  $J = 8.4$  Hz, 2H), 3.25 (t,  $J = 7.8$  Hz, 2H), 1.48 (s, 9H).  $^{13}\text{C}\{^1\text{H}\}$  NMR ( $\text{CDCl}_3$ , 150 MHz):  $\delta$  172.6, 168.6, 150.1, 140.1, 132.8, 131.8, 129.9, 129.2, 128.5, 126.4, 123.9, 121.7, 39.6, 35.5, 32.8, 29.6. HRMS (ESI)  $m/z$ :  $[\text{M}+\text{H}]^+$  Calcd for  $\text{C}_{20}\text{H}_{22}\text{ClN}_2\text{O}$  341.1415; Found 341.1410.

### **(2-(*tert*-Butyl)-1*H*-benzo[*d*]imidazol-1-yl)(cyclohexyl)methanone (3mm)**

Eluent: petroleum ether/ethyl acetate (10:1). Colorless liquid (31.6 mg, 37%).  $^1\text{H}$  NMR ( $\text{CDCl}_3$ , 400 MHz):  $\delta$  7.77-7.75 (m, 1H), 7.39-7.36 (m, 1H), 7.32-7.27 (m, 2H), 3.33-3.25 (m, 1H), 2.07 (d,  $J = 13.6$  Hz, 2H), 1.91-1.87 (m, 2H), 1.78-1.62 (m, 3H), 1.54 (s, 9H), 1.41-1.30 (m, 3H).  $^{13}\text{C}\{^1\text{H}\}$  NMR ( $\text{CDCl}_3$ , 100 MHz):  $\delta$  179.1, 162.8, 141.8, 133.7, 123.8, 123.5, 120.3, 111.7, 47.3, 35.8, 29.7, 29.6, 25.55, 25.50. HRMS (ESI)  $m/z$ :  $[\text{M}+\text{H}]^+$  Calcd for  $\text{C}_{18}\text{H}_{25}\text{N}_2\text{O}$  285.1961; Found 285.1951.

## **2. Structural elaborations**

### **2.1. Synthesis of 4<sup>[5]</sup>**

To a reaction tube equipped with a stir bar was charged with **3a** (55.7 mg, 0.2 mmol) and THF (5 mL). The reaction mixture was cooled to 0 °C and added with  $\text{LiAlH}_4$  (15.2 mg, 0.4 mmol). The tube was then sealed, and the resulting mixture was allowed to warm to room temperature and stirred for 2 h. Upon completion, it was quenched with saturated ammonium chloride solution and extracted with ethyl acetate (10 mL  $\times$  3). The combined organic phases were washed with saturated brine, dried over  $\text{Na}_2\text{SO}_4$ , filtered and concentrated

under reduced pressure. The residue was purified by silica gel chromatography using petroleum ether/ethyl acetate (3:1) as eluent to afford **4**.

#### **2-(*tert*-Butyl)-1*H*-benzo[*d*]imidazole (4)**<sup>[6]</sup>

Eluent: petroleum ether/ethyl acetate (3:1). White solid (30.7 mg, 88%), mp 222-225 °C. <sup>1</sup>H NMR (DMSO-*d*<sub>6</sub>, 600 MHz): δ 12.1 (s, 1H), 7.52-7.41 (m, 2H), 7.11-7.10 (m, 2H), 1.40 (s, 9H). <sup>13</sup>C{<sup>1</sup>H} NMR (DMSO, 150 MHz): δ 162.6, 143.3, 135.1, 121.9, 121.2, 118.8, 111.2, 33.6, 29.7. HRMS (ESI) *m/z*: [M+H]<sup>+</sup> Calcd for C<sub>11</sub>H<sub>15</sub>N<sub>2</sub> 175.1230; Found 175.1230.

#### **2.2. Synthesis of 5**<sup>[7]</sup>

To a reaction tube equipped with a stir bar were charged with **3aa** (35.7 mg, 0.1 mmol), DMSO (1 mL), Pd(OAc)<sub>2</sub> (1.1 mg, 0.005 mmol), PPh<sub>3</sub> (5.2 mg, 0.02 mmol), K<sub>3</sub>PO<sub>4</sub> (25.5 mg, 0.12 mmol) and ethynylbenzene (16.5 μL, 0.15 mmol). The tube was then sealed, and the resulting mixture was stirred at 80 °C for 24 h under argon atmosphere. Upon completion, it was diluted with ethyl acetate (20 mL) and washed with water and brine. The organic layer was dried over anhydrous Na<sub>2</sub>SO<sub>4</sub>, filtered and concentrated under reduced pressure. The residue was purified by column chromatography on silica gel with petroleum ether/ethyl acetate (20:1) as the eluent to give **5**.

#### **(2-(*tert*-Butyl)-1*H*-benzo[*d*]imidazol-1-yl)(2-(phenylethynyl)phenyl)methanone (5)**

Eluent: petroleum ether/ethyl acetate (20:1). White solid (32.9 mg, 87%), mp 191-193 °C. <sup>1</sup>H NMR (CDCl<sub>3</sub>, 400 MHz): δ 7.88 (d, *J* = 7.6 Hz, 1H), 7.78 (d, *J* = 8.0 Hz, 1H), 7.69-7.66 (m, 2H), 7.61-7.56 (m, 1H), 7.33-7.30 (m, 3H), 7.26-7.22 (m, 3H), 7.05-7.01 (m, 1H), 6.42 (d, *J* = 8.4 Hz, 1H), 1.64 (s, 9H). <sup>13</sup>C{<sup>1</sup>H} NMR (CDCl<sub>3</sub>, 100 MHz): δ 169.0, 163.0, 141.8, 135.6, 134.9, 134.3, 133.0, 131.9, 130.8, 128.92, 128.89, 128.3, 123.7, 123.54, 123.47, 121.9, 119.8, 112.1, 95.2, 85.6, 35.7, 29.6. HRMS (ESI) *m/z*: [M+H]<sup>+</sup> Calcd for C<sub>26</sub>H<sub>23</sub>N<sub>2</sub>O 379.1805; Found 379.1800.



### 2.3. Synthesis of **6**<sup>[8]</sup>

To a reaction tube equipped with a stir bar were charged with **3aa** (71.5 mg, 0.2 mmol), piperidine (1 mL), Pd(PPh<sub>3</sub>)<sub>4</sub> (4.6 mg, 0.004 mmol) and CuI (3.8 mg, 0.02 mmol). The tube was then sealed, and the resulting mixture was stirred at room temperature for 15 h. Upon completion, it was quenched with saturated ammonium chloride solution and extracted with ethyl acetate (10 mL × 3). The combined organic phases were washed with saturated brine, dried over Na<sub>2</sub>SO<sub>4</sub>, filtered and concentrated under reduced pressure. The residue was purified by silica gel chromatography using petroleum ether/ethyl acetate (10:1) as eluent to afford **6**.

#### **(2-(tert-Butyl)-1H-benzo[d]imidazol-1-yl)(2-(piperidin-1-yl)phenyl)methanone (6)**

Eluent: petroleum ether/ethyl acetate (10:1). White solid (23.2 mg, 32%), mp 194-196 °C. <sup>1</sup>H NMR (CDCl<sub>3</sub>, 600 MHz): δ 7.72 (d, *J* = 7.8 Hz, 1H), 7.52 (t, *J* = 7.2 Hz, 1H), 7.47 (d, *J* = 7.2 Hz, 1H), 7.18 (t, *J* = 7.8 Hz, 1H), 7.09 (d, *J* = 8.4 Hz, 1H), 7.02 (t, *J* = 7.8 Hz, 1H), 6.93 (t, *J* = 7.8 Hz, 1H), 6.32 (d, *J* = 9.0 Hz, 1H), 2.97 (br s, 2H), 2.79 (br s, 2H), 1.65 (s, 9H), 1.41-1.37 (m, 2H), 1.30-1.26 (m, 4H). <sup>13</sup>C{<sup>1</sup>H} NMR (CDCl<sub>3</sub>, 150 MHz): δ 168.6, 163.6, 153.7, 141.7, 135.0, 134.1, 132.3, 126.6, 123.3, 123.2, 121.6, 119.9, 119.7, 113.0, 53.8, 36.3, 29.3, 25.9, 23.8. HRMS (ESI) *m/z*: [M+H]<sup>+</sup> Calcd for C<sub>23</sub>H<sub>27</sub>N<sub>3</sub>NaO 384.2046; Found 384.2068.

### 2.4. Synthesis of **7**<sup>[9]</sup>

To a reaction tube equipped with a stir bar were charged with **3aa** (35.7 mg, 0.1 mmol), dioxane (1 mL), Pd(OAc)<sub>2</sub> (2.2 mg, 0.01 mmol), PPh<sub>3</sub> (15.7 mg, 0.06 mmol), K<sub>2</sub>CO<sub>3</sub> (55.3 mg, 0.4 mmol) and phenylboronic acid (13.4 mg, 0.11 mmol). The tube was then sealed, and the resulting mixture was stirred at 80 °C for 24 h under argon atmosphere. Upon completion, it was diluted with ethyl acetate (20 mL) and washed with water and brine. The organic layer was dried over anhydrous Na<sub>2</sub>SO<sub>4</sub>, filtered and concentrated under reduced pressure. The residue was purified by column chromatography on silica gel with petroleum ether/ethyl acetate (40:1) as the eluent to give **7**.

### [1,1'-Biphenyl]-2-yl(2-(*tert*-butyl)-1*H*-benzo[*d*]imidazol-1-yl)methanone (7)

Eluent: petroleum ether/ethyl acetate (40:1). White solid (32.6 mg, 92%), mp 209-211 °C. <sup>1</sup>H NMR (CDCl<sub>3</sub>, 600 MHz): δ 7.69-7.65 (m, 2H), 7.57 (dd, *J*<sub>1</sub> = 7.8 Hz, *J*<sub>2</sub> = 1.8 Hz, 1H), 7.50-7.45 (m, 2H), 7.26-7.16 (m, 6H), 7.00-6.98 (m, 1H), 6.30 (d, *J* = 8.4 Hz, 1H), 1.54 (s, 9H). <sup>13</sup>C{<sup>1</sup>H} NMR (CDCl<sub>3</sub>, 150 MHz): δ 169.1, 163.8, 142.9, 141.7, 139.1, 134.5, 134.0, 132.6, 131.7, 130.0, 128.5, 128.3, 128.0, 127.8, 123.6, 123.5, 119.9, 113.3, 36.2, 29.3. HRMS (ESI) *m/z*: [M+H]<sup>+</sup> Calcd for C<sub>24</sub>H<sub>23</sub>N<sub>2</sub>O 355.1805; Found 355.1804.

### 3. Gram-scale synthesis of 3a

To a reaction tube equipped with a stir bar were charged with *N*-phenylpivalimidamide (**1a**, 1.058 g, 6 mmol), ethyl acetate (25 mL), [RhCp\*Cl<sub>2</sub>]<sub>2</sub> (77.3 mg, 0.125 mmol), AgSbF<sub>6</sub> (171.8 mg, 0.5 mmol), Zn(OAc)<sub>2</sub> (275.2 mg, 1.5 mmol) and 3-phenyl-1,4,2-dioxazol-5-one (**2a**, 0.816 g, 5 mmol). The tube was then sealed, and the resulting mixture was stirred at 110 °C under air for 10 h. Upon completion, it was cooled to room temperature, quenched with water and extracted with ethyl acetate (30 mL × 3). The combined organic phases were dried over anhydrous Na<sub>2</sub>SO<sub>4</sub>, filtered and concentrated under reduced pressure. The residue was purified by silica gel chromatography using petroleum ether/ethyl acetate (10:1) as eluent to afford **3a** (0.849 g, 61%).

### III. Mechanism studies

#### 1. Mechanism studies (I)

##### 1.1. H/D exchange experiment (I)

To a reaction tube equipped with a stir bar were charged with **1a** (52.9 mg, 0.3 mmol), ethyl acetate (1.5 mL), CD<sub>3</sub>OD (0.12 mL, 3 mmol), [RhCp\*Cl<sub>2</sub>]<sub>2</sub> (4.6 mg, 0.0075 mmol), AgSbF<sub>6</sub> (10.3 mg, 0.03 mmol), and Zn(OAc)<sub>2</sub> (16.5 mg, 0.09 mmol). The resulting mixture was stirred at 110 °C under air for 30 min. Afterwards, it was cooled to room temperature, quenched with water and extracted with ethyl acetate (10 mL × 3). The combined organic phases were dried over anhydrous Na<sub>2</sub>SO<sub>4</sub>, filtered and concentrated under reduced pressure. The residue was purified by silica gel chromatography using petroleum ether/ethyl acetate (5:1) as eluent to give a mixture of **1a** and **1a-d<sub>n</sub>**. Upon analyzing the <sup>1</sup>H NMR spectrum of the mixture, the deuteration ratio was determined to be 20%.

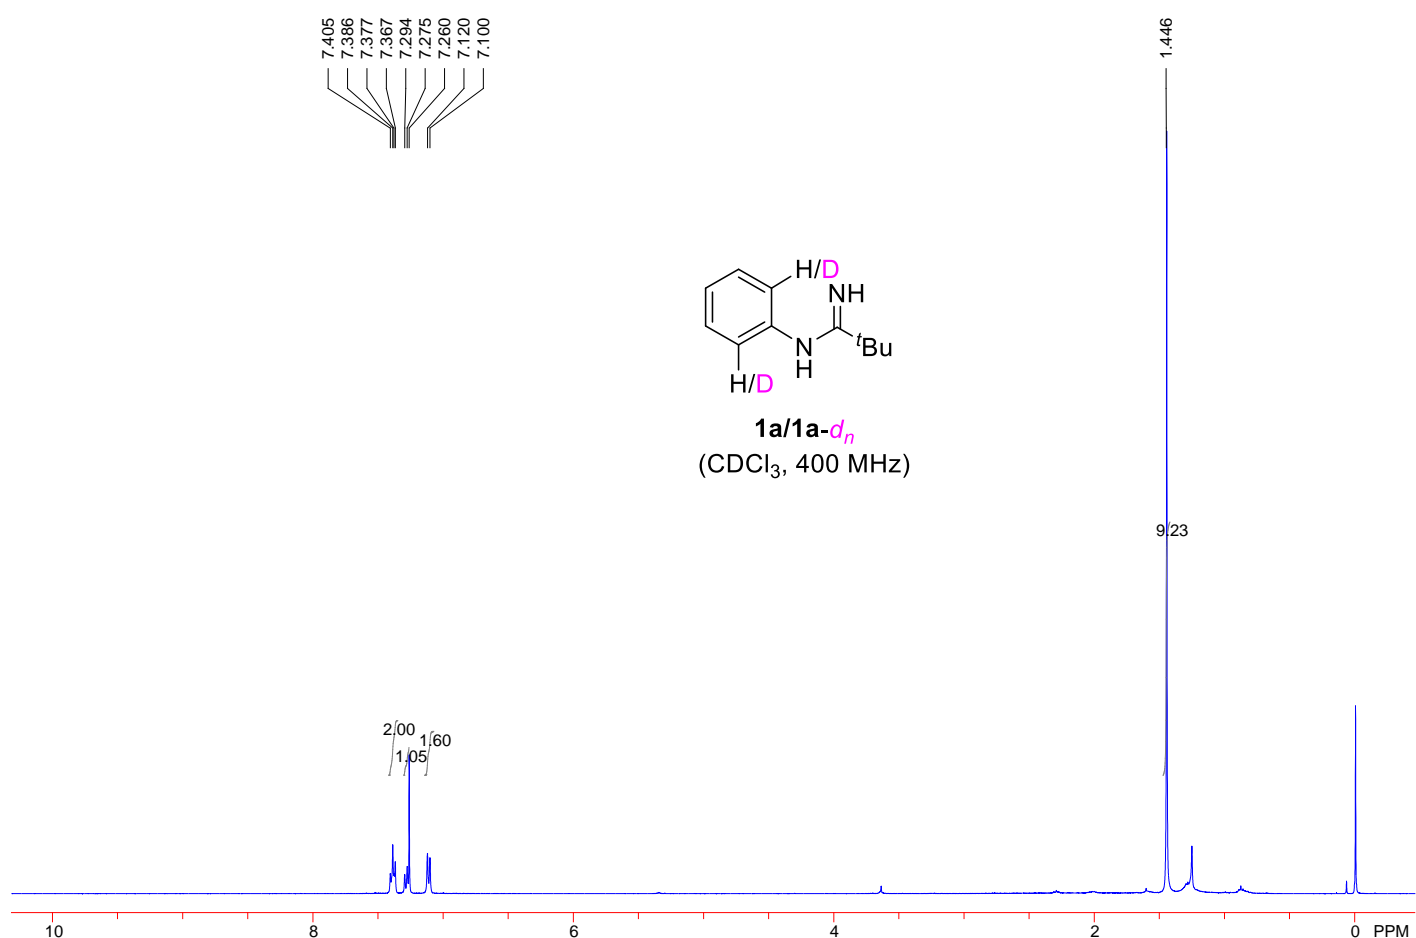

## 1.2. H/D exchange experiment (II)

To a reaction tube equipped with a stir bar were charged with **1a** (42.3 mg, 0.24 mmol), **2a** (32.6 mg, 0.2 mmol), ethyl acetate (1 mL), CD<sub>3</sub>OD (81  $\mu$ L, 2 mmol), [RhCp\*Cl<sub>2</sub>]<sub>2</sub> (3.1 mg, 0.005 mmol), AgSbF<sub>6</sub> (6.9 mg, 0.02 mmol), and Zn(OAc)<sub>2</sub> (11.0 mg, 0.06 mmol). The resulting mixture was stirred at 110 °C under air for 3 h. Afterwards, it was cooled to room temperature, quenched with water and extracted with ethyl acetate (10 mL  $\times$  3). The combined organic phases were dried over anhydrous Na<sub>2</sub>SO<sub>4</sub>, filtered and concentrated under reduced pressure. The residue was purified by silica gel chromatography using petroleum ether/ethyl acetate (10:1) as eluent to give a mixture of **3a** and **3a-d<sub>n</sub>**. Upon analyzing the <sup>1</sup>H NMR spectrum of the mixture, the deuteration ratio was determined to be 54%.

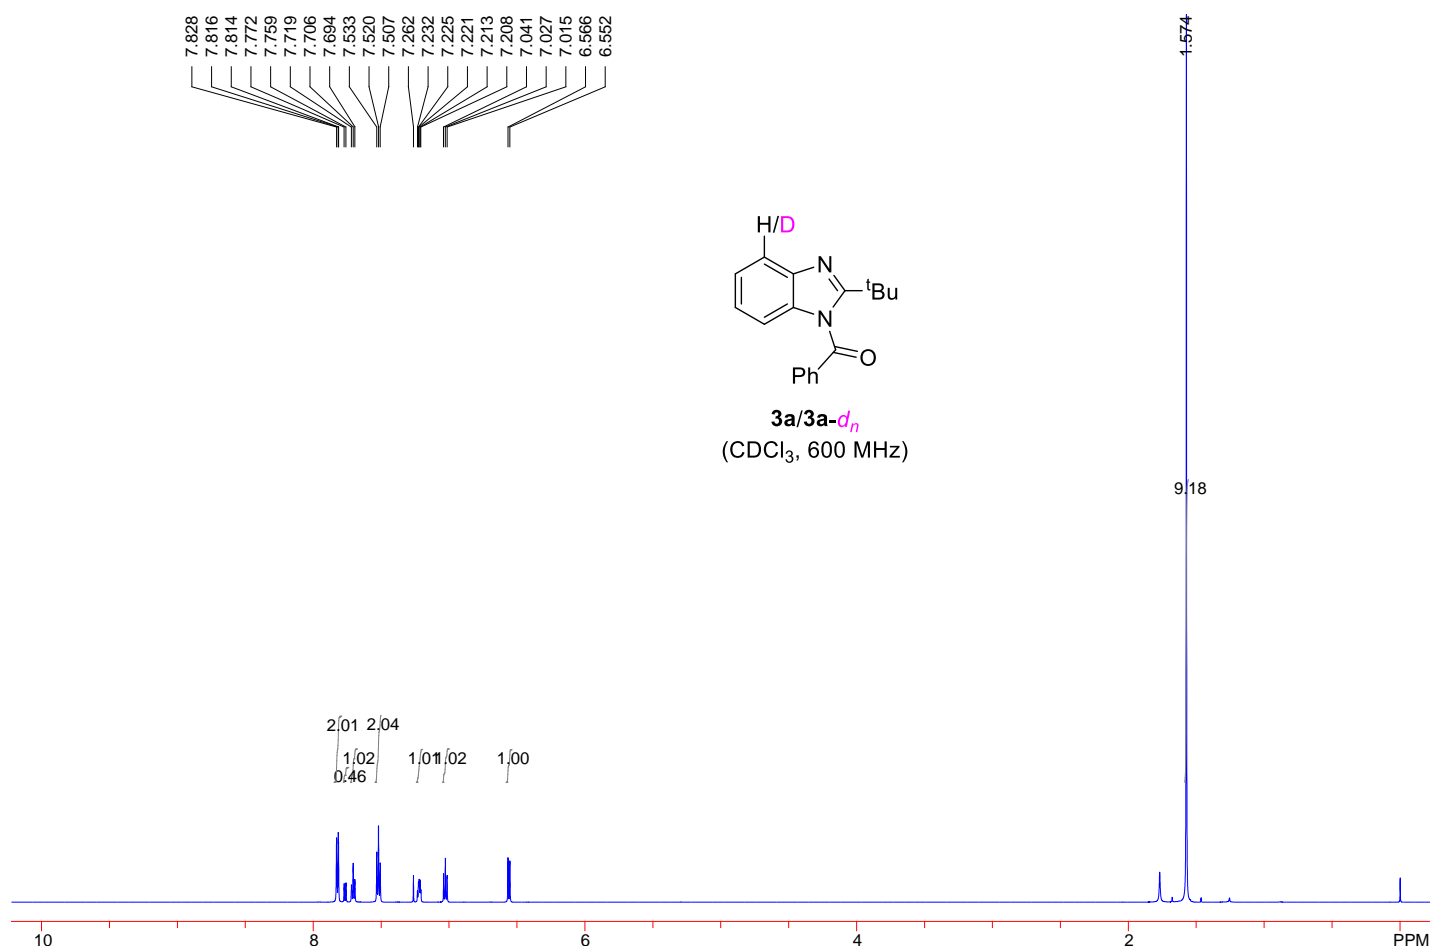

## 1.3. Kinetic isotope effect study

To a reaction tube equipped with a stir bar were added **1a** (105.6 mg, 0.6 mmol), **1a-d<sub>5</sub>** (108.6 mg, 0.6 mmol), ethyl acetate (2.5 mL), **2a** (97.8 mg, 0.6 mmol), [RhCp\*Cl<sub>2</sub>]<sub>2</sub> (7.7 mg, 0.0125 mmol), AgSbF<sub>6</sub> (17.2 mg, 0.05 mmol) and Zn(OAc)<sub>2</sub> (27.5 mg, 0.15 mmol) with stirring. After the tube was sealed, the mixture was stirred at 110 °C under air for 10 h. Upon completion, it was cooled to room temperature, quenched with water and extracted with ethyl acetate (10 mL × 3). The combined organic phases were dried over anhydrous Na<sub>2</sub>SO<sub>4</sub>, filtered and concentrated under reduced pressure. The residue was purified by silica gel chromatography using petroleum ether/ethyl acetate (10:1) as eluent to afford a mixture of **3a** and **3a-d<sub>4</sub>**. Upon analyzing the <sup>1</sup>H NMR spectrum of the mixture, the ratio of **3a** to **3a-d<sub>4</sub>** was determined to be 0.6:0.4. Accordingly, the intermolecular KIE (k<sub>H</sub>/k<sub>D</sub>) was calculated to be 1.5.

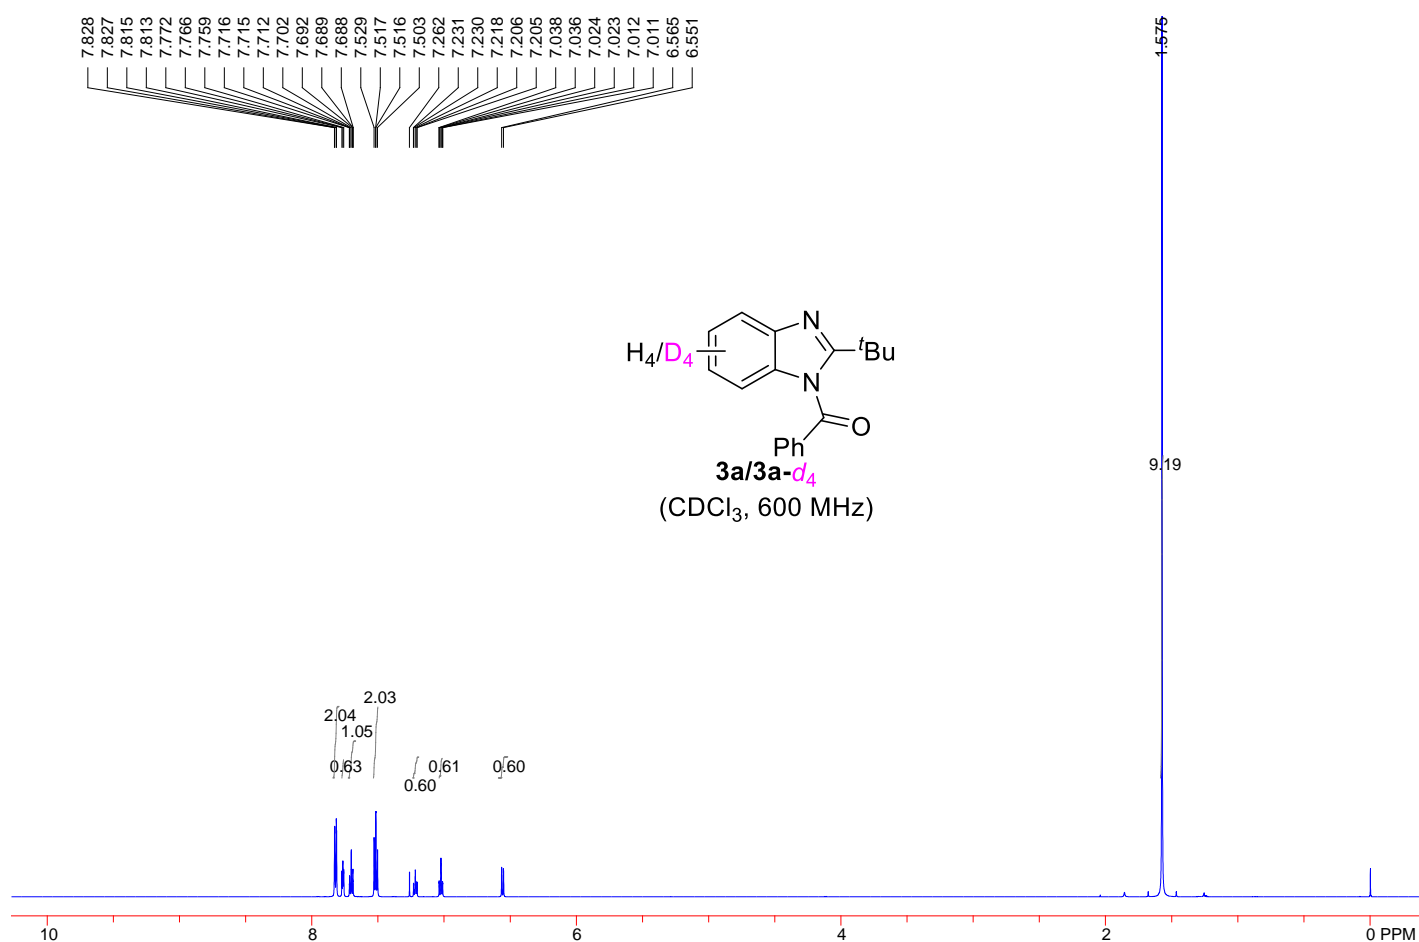

#### 1.4. Competition study of substrates with different electronic characteristics

To a reaction tube equipped with a stir bar were added **1b** (57.1 mg, 0.3 mmol), **1e** (58.3 mg, 0.3 mmol), ethyl acetate (1.5 mL), **2a** (48.9 mg, 0.3 mmol), [RhCp\*Cl<sub>2</sub>]<sub>2</sub> (4.6 mg, 0.0075 mmol), AgSbF<sub>6</sub> (10.3 mg, 0.03 mmol) and Zn(OAc)<sub>2</sub> (16.5 mg, 0.09 mmol) with stirring. After the tube was sealed, the mixture was stirred at 110 °C under air for 10 h. Upon completion, it was cooled to room temperature, quenched with water (10 mL) and extracted with ethyl acetate (10 mL × 3). The combined organic phases were dried over anhydrous Na<sub>2</sub>SO<sub>4</sub>, filtered and concentrated under reduced pressure. The residue was purified by silica gel chromatography using petroleum ether/ethyl acetate (10:1) as eluent to afford a mixture of **3b** and **3e**. Upon analyzing the <sup>1</sup>H NMR spectrum of the mixture, the ratio of **3b** to **3e** was determined to be 0.7:1.

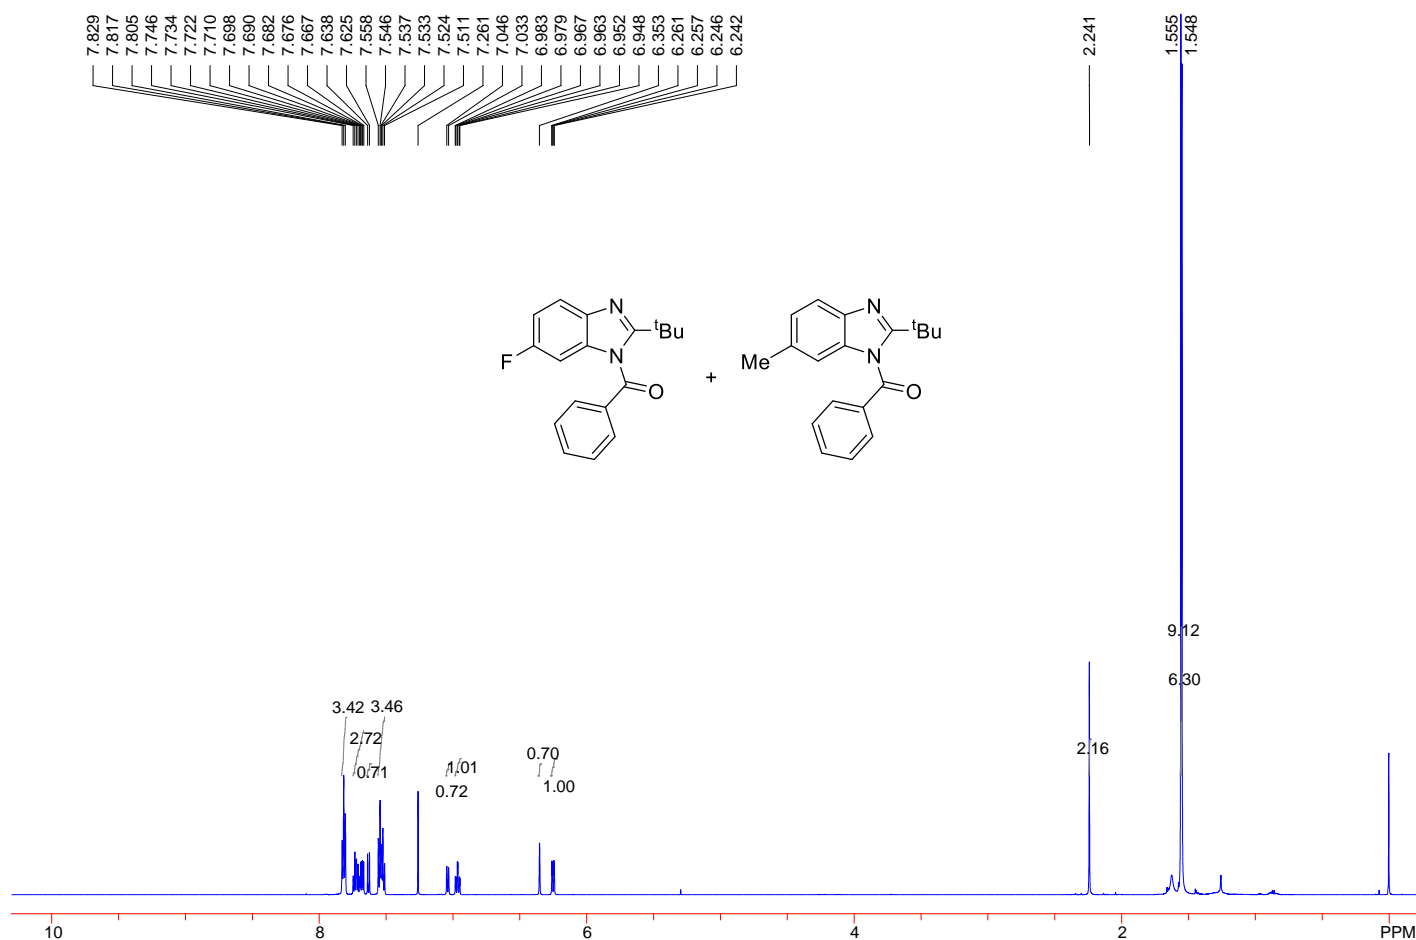

## 2. Mechanism studies (II)

2.1. To a reaction tube equipped with a stir bar were charged with *N*-phenylpivalimidamide (**1a**, 63.5 mg, 0.36 mmol), ethyl acetate (1.5 mL), [RhCp\*Cl<sub>2</sub>]<sub>2</sub> (4.6 mg, 0.0075 mmol), AgSbF<sub>6</sub> (10.3 mg, 0.03 mmol),

Zn(OAc)<sub>2</sub> (16.5 mg, 0.09 mmol) and 3-phenyl-1,4,2-dioxazol-5-one (**2a**, 48.9 mg, 0.3 mmol). The tube was sealed, and the reaction mixture was stirred at room temperature under air for 10 h. Upon completion, it was quenched with water (10 mL) and extracted with ethyl acetate (10 mL × 3). The combined organic phases were dried over anhydrous Na<sub>2</sub>SO<sub>4</sub>, filtered and concentrated under reduced pressure. The residue was purified by silica gel chromatography using dichloromethane/methanol (10:1) as eluent to afford **IV** (73.7 mg, 83%).

#### ***N*-(2-Pivalimidamidophenyl)benzamide (IV)**

Eluent: dichloromethane/methanol (10:1). White solid (73.7 mg, 83%), mp 163-164 °C. <sup>1</sup>H NMR (DMSO, 600 MHz): δ 9.20 (br s, 1H), 8.21 (d, *J* = 4.2 Hz, 1H), 7.86 (d, *J* = 7.2 Hz, 2H), 7.60 (t, *J* = 7.2 Hz, 1H), 7.55 (t, *J* = 7.8 Hz, 2H), 7.09-6.94 (m, 3H), 6.22-6.16 (m, 2H), 1.26 (s, 9H). <sup>13</sup>C{<sup>1</sup>H} NMR (CDCl<sub>3</sub>, 150 MHz): δ 166.8, 164.9, 137.9, 135.3, 131.6, 131.5, 128.7, 127.0, 124.2, 123.9, 120.5, 120.2, 37.3, 28.6. HRMS (ESI) *m/z*: [M+H]<sup>+</sup> Calcd for C<sub>18</sub>H<sub>22</sub>N<sub>3</sub>O 296.1757; Found 296.1766.

2.2. To a reaction tube equipped with a stir bar were charged with **IV** (88.6 mg, 0.3 mmol), ethyl acetate (1.5 mL), [RhCp\*Cl<sub>2</sub>]<sub>2</sub> (4.6 mg, 0.0075 mmol), AgSbF<sub>6</sub> (10.3 mg, 0.03 mmol) and Zn(OAc)<sub>2</sub> (16.5 mg, 0.09 mmol). The tube was sealed, and the reaction mixture was stirred at 110 °C under air for 10 h. Upon completion, it was cooled to room temperature, quenched with water (10 mL) and extracted with ethyl acetate (10 mL × 3). The combined organic phases were dried over anhydrous Na<sub>2</sub>SO<sub>4</sub>, filtered and concentrated under reduced pressure. The residue was purified by silica gel chromatography using petroleum ether/ethyl acetate (10:1) as eluent to afford **3a** (78.5 mg, 94%).

2.3. To a reaction tube equipped with a stir bar were charged with **IV** (88.6 mg, 0.3 mmol), ethyl acetate (1.5 mL) and [RhCp\*Cl<sub>2</sub>]<sub>2</sub> (4.6 mg, 0.0075 mmol). The tube was sealed, and the reaction mixture was stirred at 110 °C under air for 10 h. Upon completion, it was cooled to room temperature, quenched with water (10

mL) and extracted with ethyl acetate (10 mL × 3). The combined organic phases were dried over anhydrous Na<sub>2</sub>SO<sub>4</sub>, filtered and concentrated under reduced pressure. The residue was purified by silica gel chromatography using petroleum ether/ethyl acetate (10:1) as eluent to afford **3a** (23.4 mg, 28%).

2.4. To a reaction tube equipped with a stir bar were charged with **IV** (88.6 mg, 0.3 mmol), ethyl acetate (1.5 mL) and AgSbF<sub>6</sub> (10.3 mg, 0.03 mmol). The tube was sealed, and the reaction mixture was stirred at 110 °C under air for 10 h. Upon completion, it was cooled to room temperature, quenched with water (10 mL) and extracted with ethyl acetate (10 mL × 3). The combined organic phases were dried over anhydrous Na<sub>2</sub>SO<sub>4</sub>, filtered and concentrated under reduced pressure. The residue was purified by silica gel chromatography using petroleum ether/ethyl acetate (10:1) as eluent to afford **3a** (73.5 mg, 88%).

2.5. To a reaction tube equipped with a stir bar were charged with **IV** (88.6 mg, 0.3 mmol), ethyl acetate (1.5 mL) and Zn(OAc)<sub>2</sub> (16.5 mg, 0.09 mmol). The tube was sealed, and the reaction mixture was stirred at 110 °C under air for 10 h. Upon completion, it was cooled to room temperature, quenched with water (10 mL) and extracted with ethyl acetate (10 mL × 3). The combined organic phases were dried over anhydrous Na<sub>2</sub>SO<sub>4</sub>, filtered and concentrated under reduced pressure. The residue was purified by silica gel chromatography using petroleum ether/ethyl acetate (10:1) as eluent to afford **3a** (71.0 mg, 85%).

2.6. To a reaction tube equipped with a stir bar were charged with **IV** (88.6 mg, 0.3 mmol) and ethyl acetate (1.5 mL). The tube was sealed, and the reaction mixture was stirred at 110 °C under air for 10 h. Upon completion, it was cooled to room temperature, quenched with water (10 mL) and extracted with ethyl acetate (10 mL × 3). The combined organic phases were dried over anhydrous Na<sub>2</sub>SO<sub>4</sub>, filtered and concentrated under reduced pressure. The residue was purified by silica gel chromatography using petroleum ether/ethyl acetate (10:1) as eluent to afford **3a** (21.7 mg, 26%).



#### IV. Copies of NMR spectra of products 3a-3mm

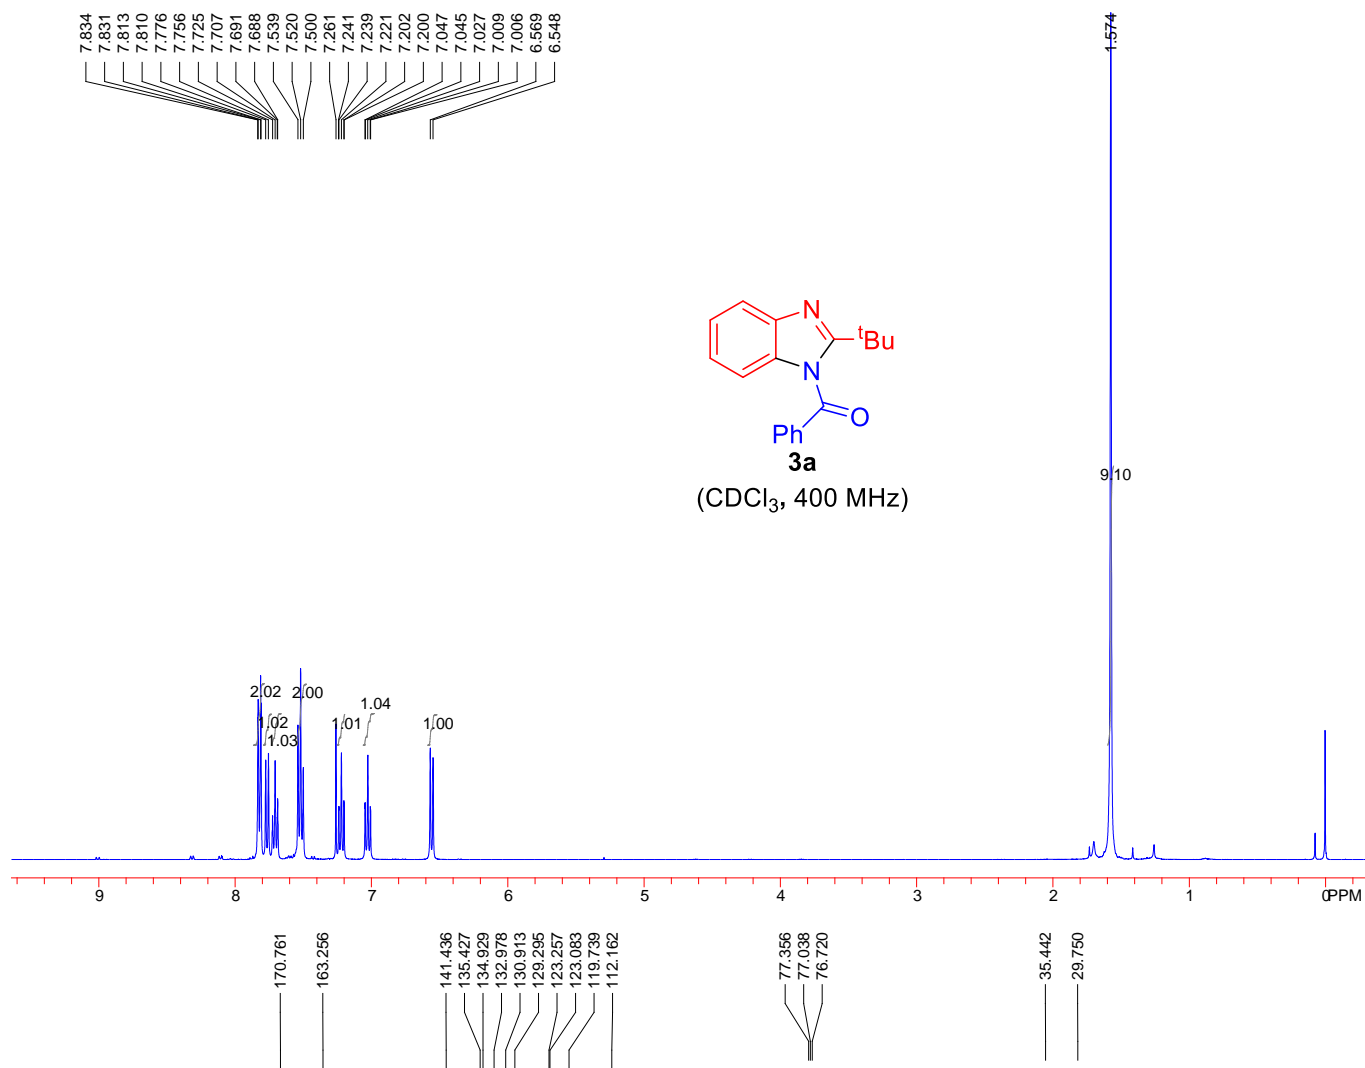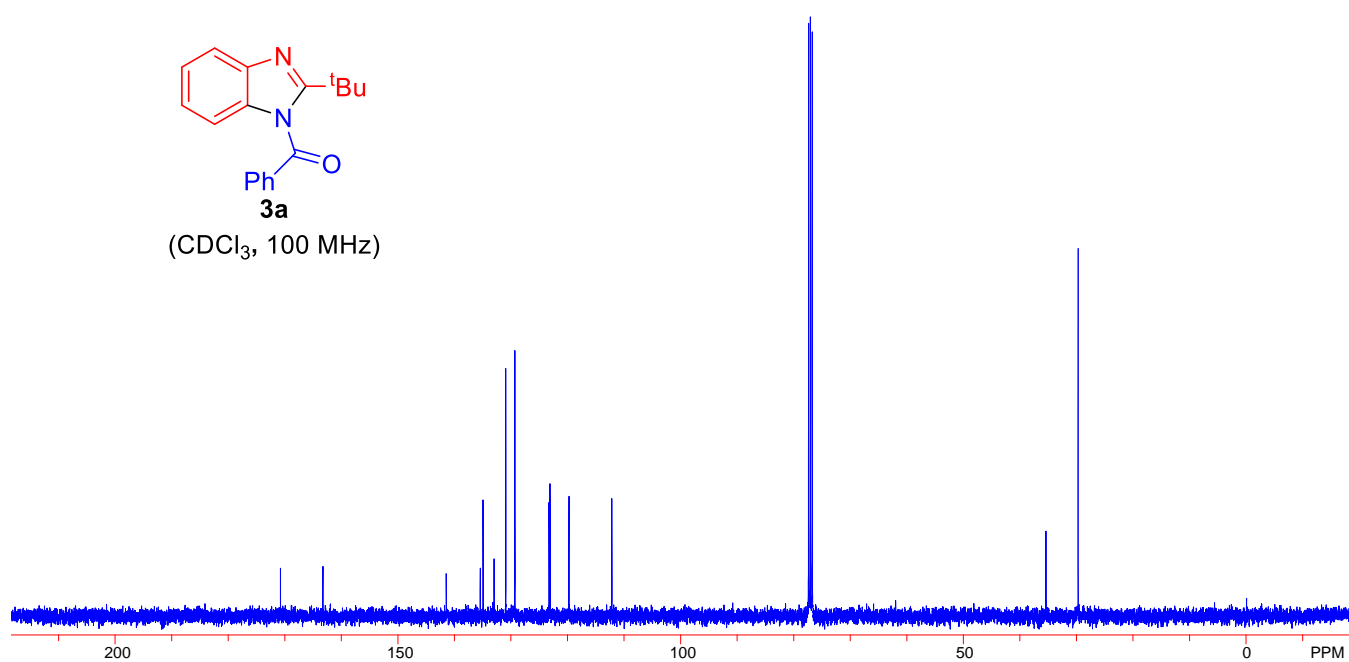

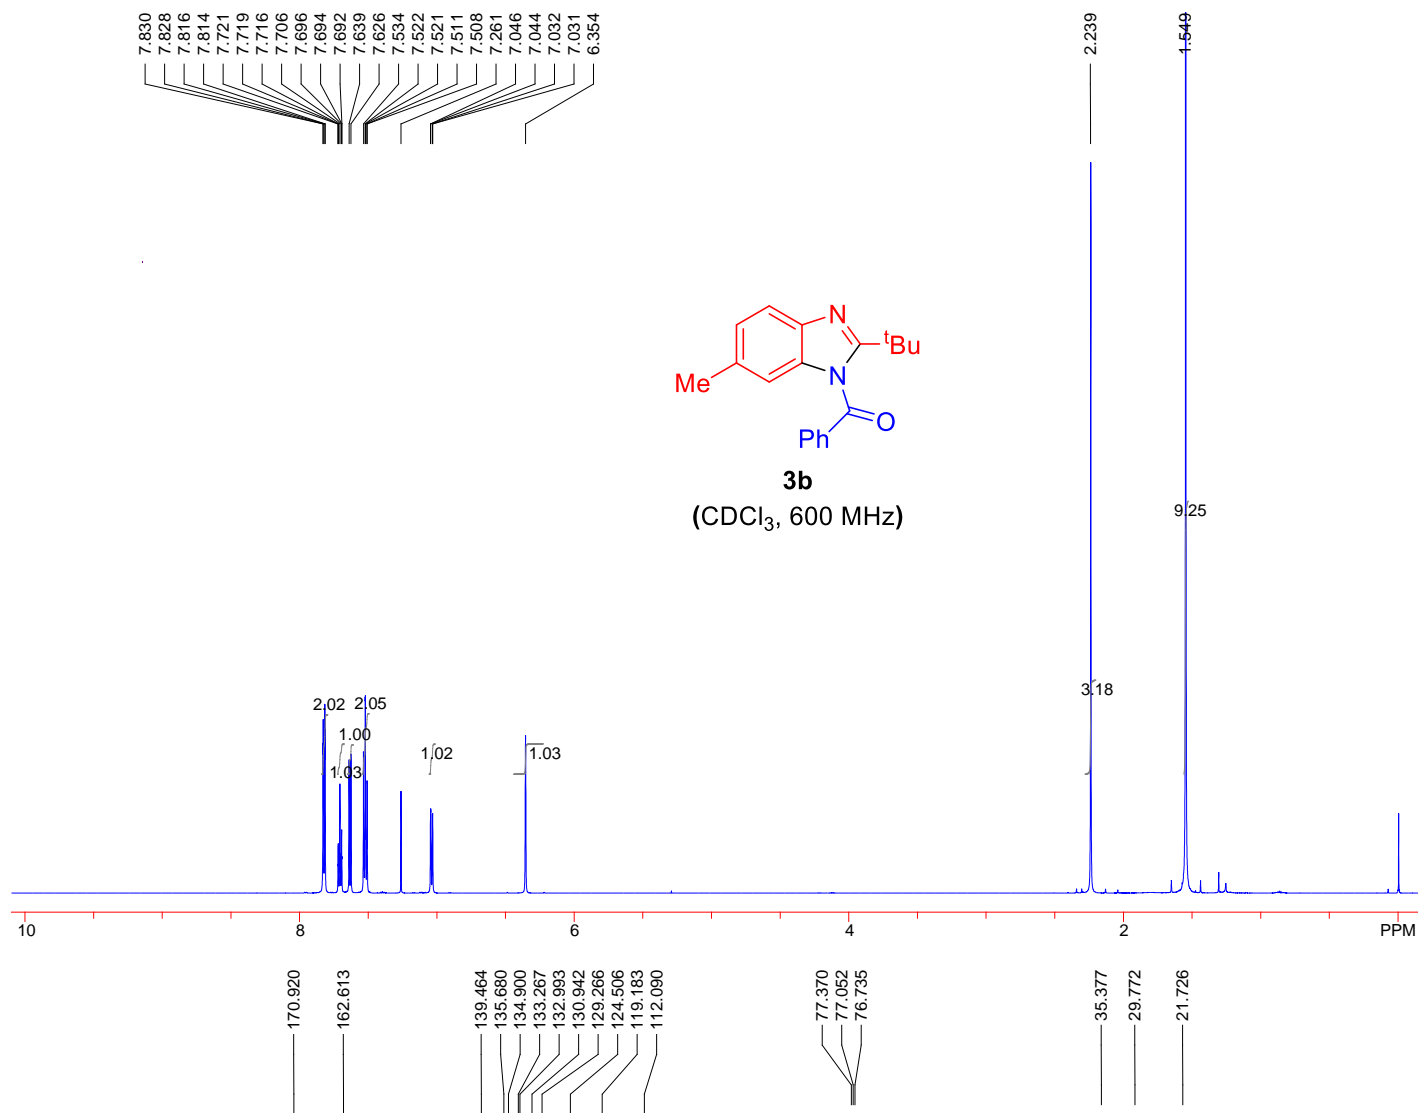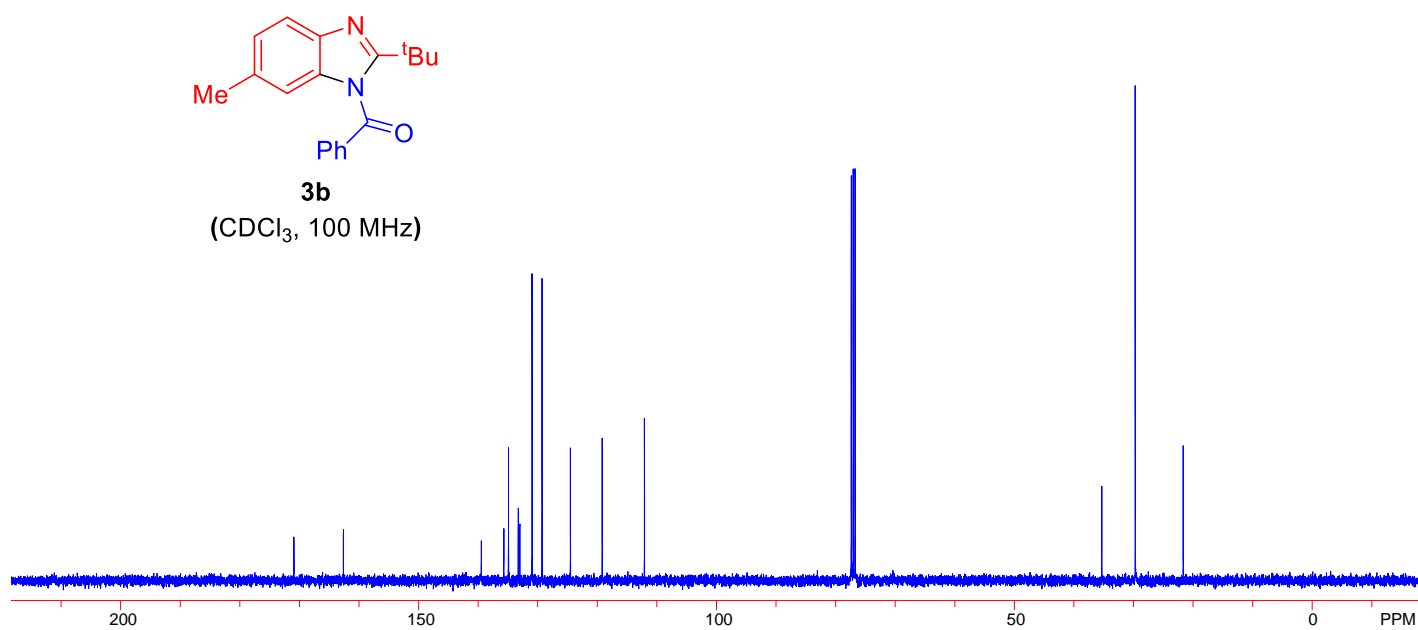

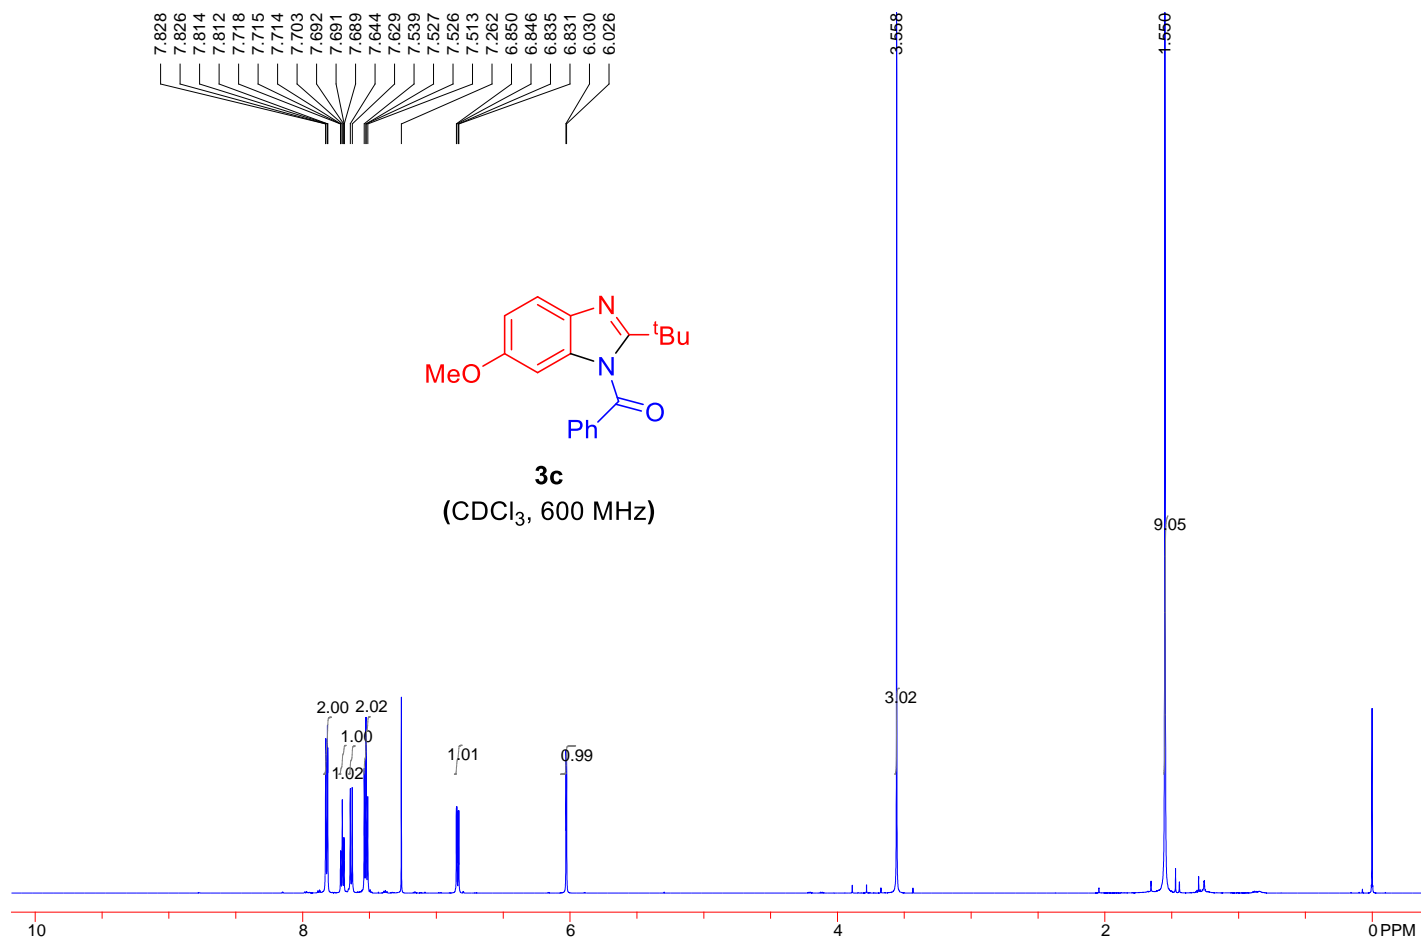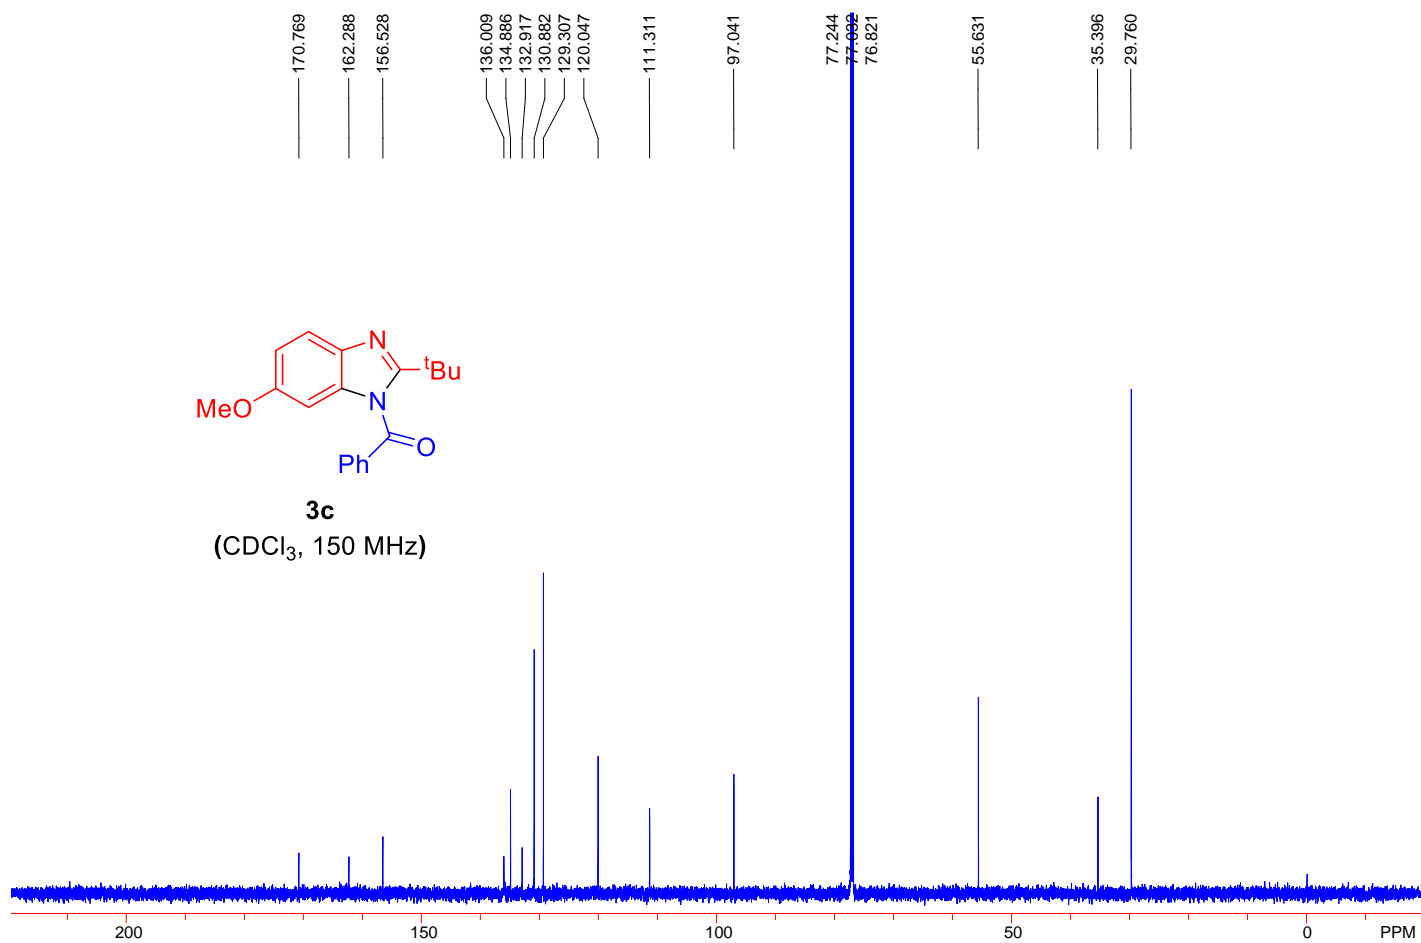

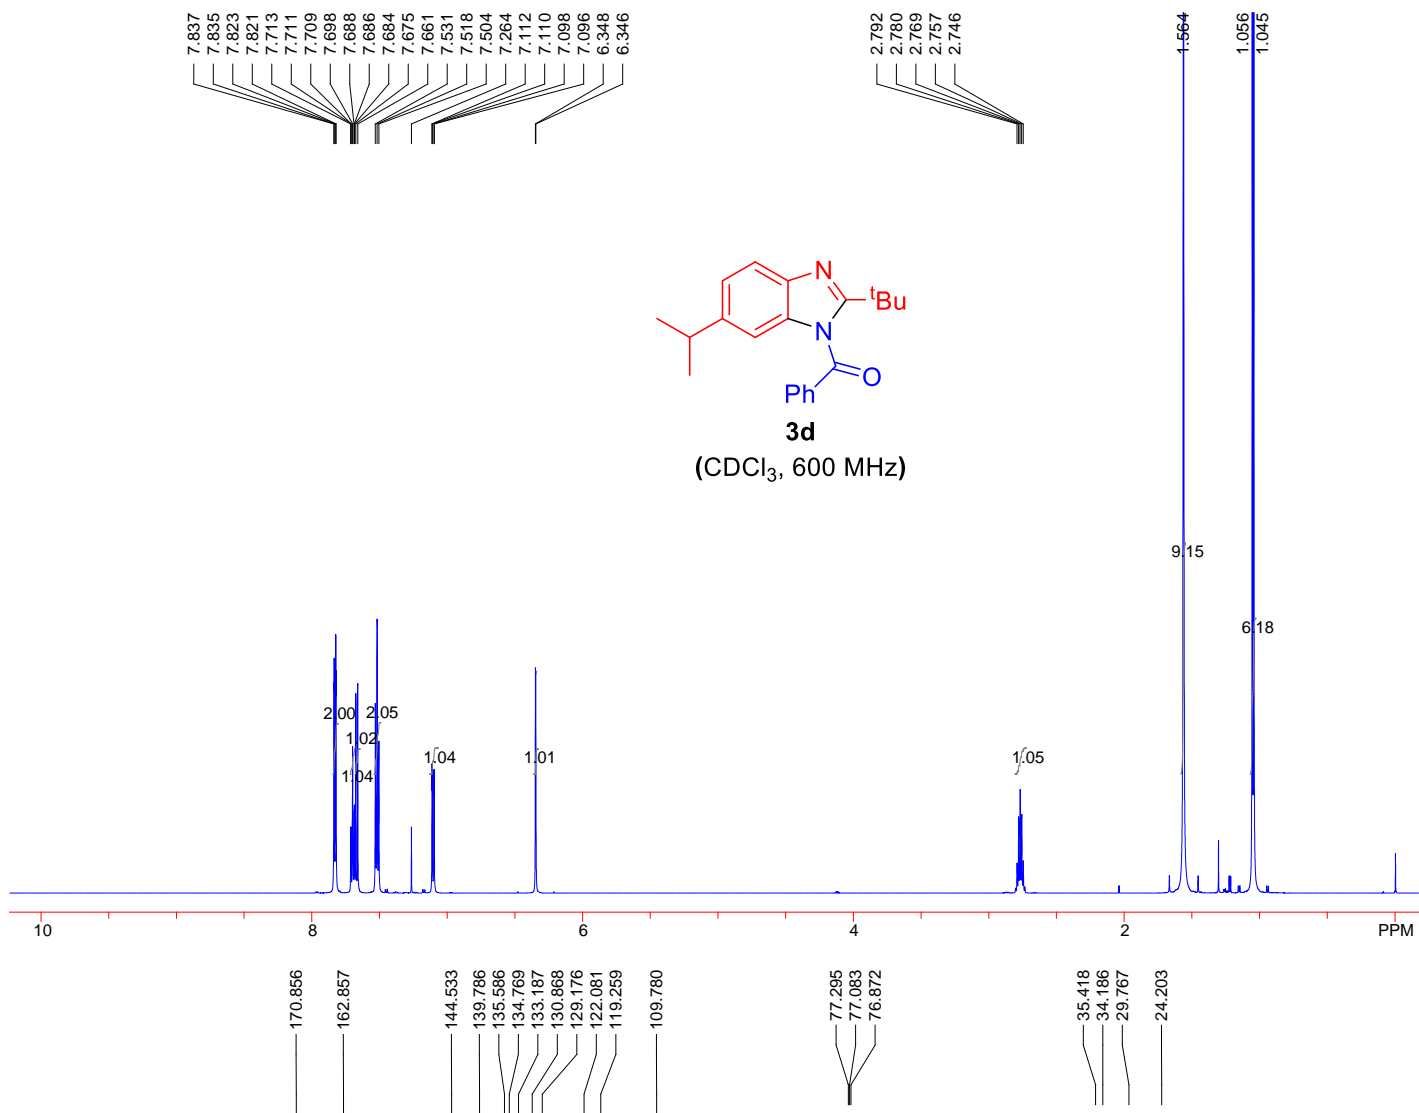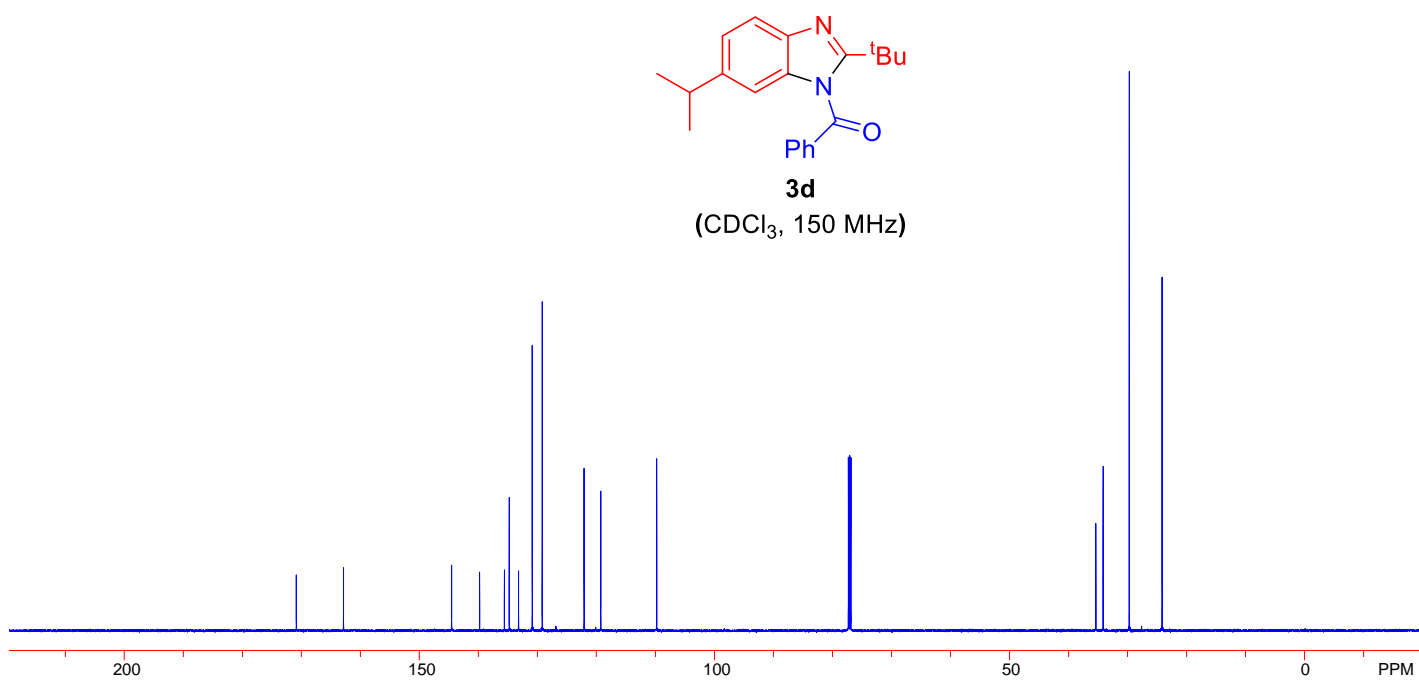

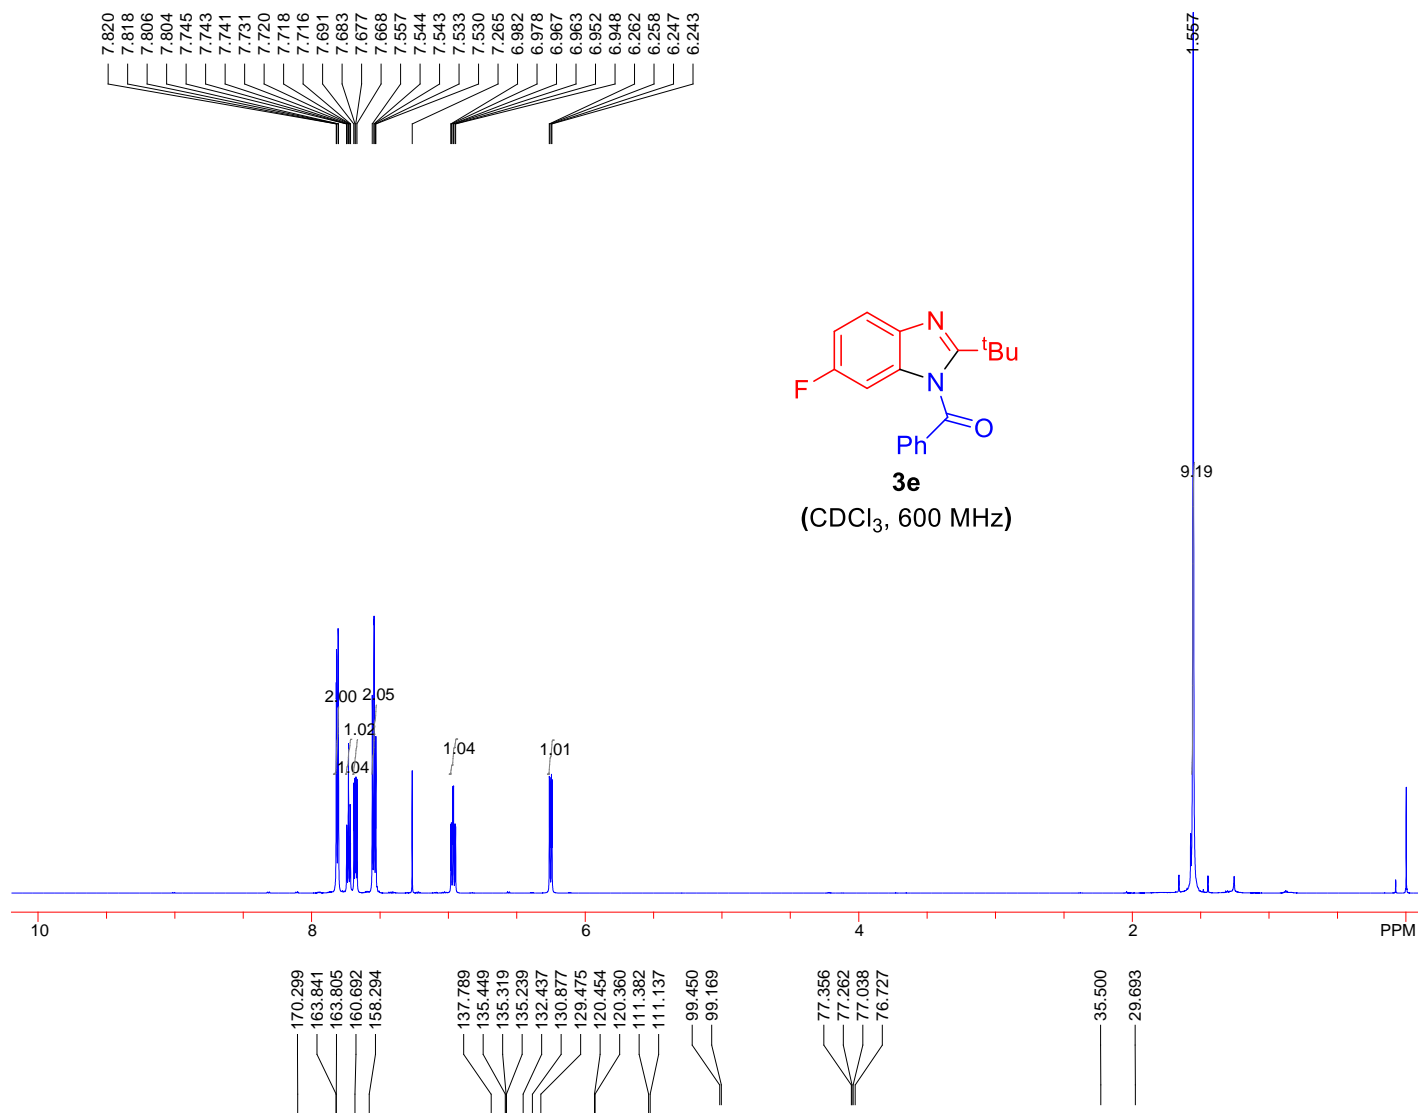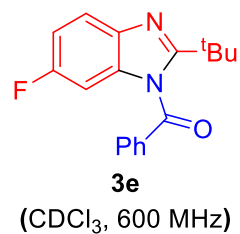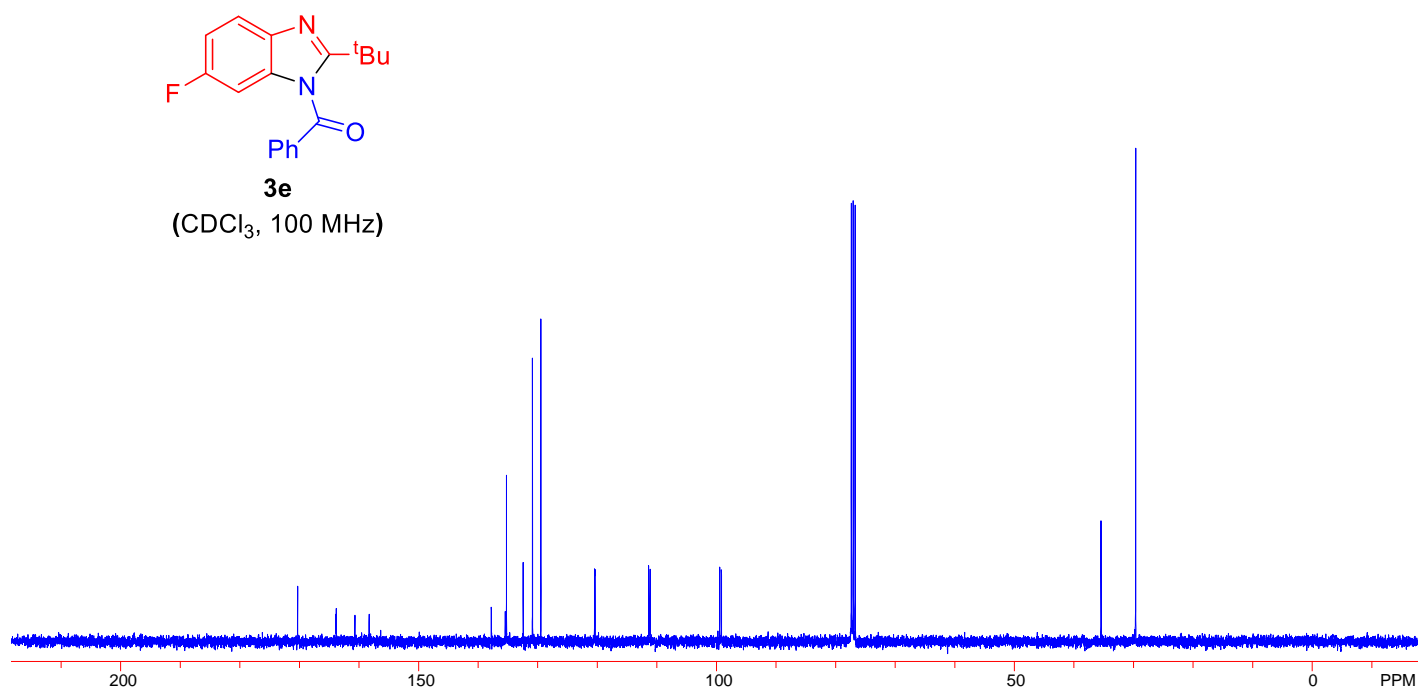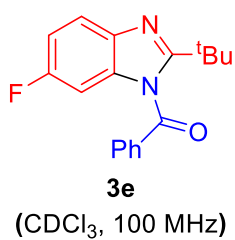

117.597  
117.615  
117.623  
117.630  
117.641

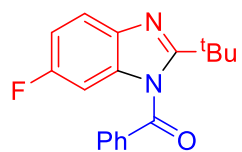

**3e**

(CDCl<sub>3</sub>, 565 MHz)

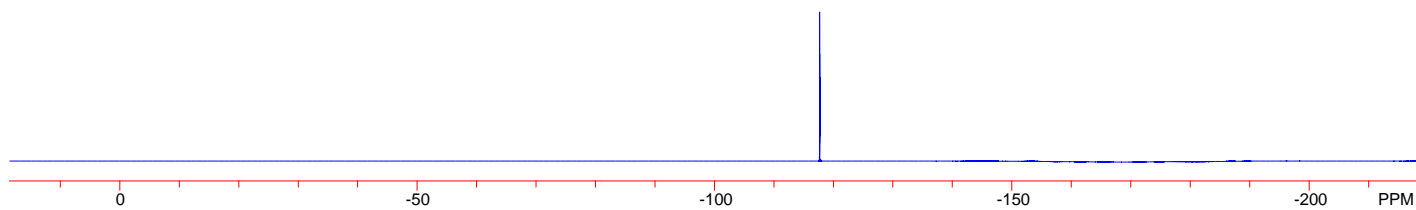

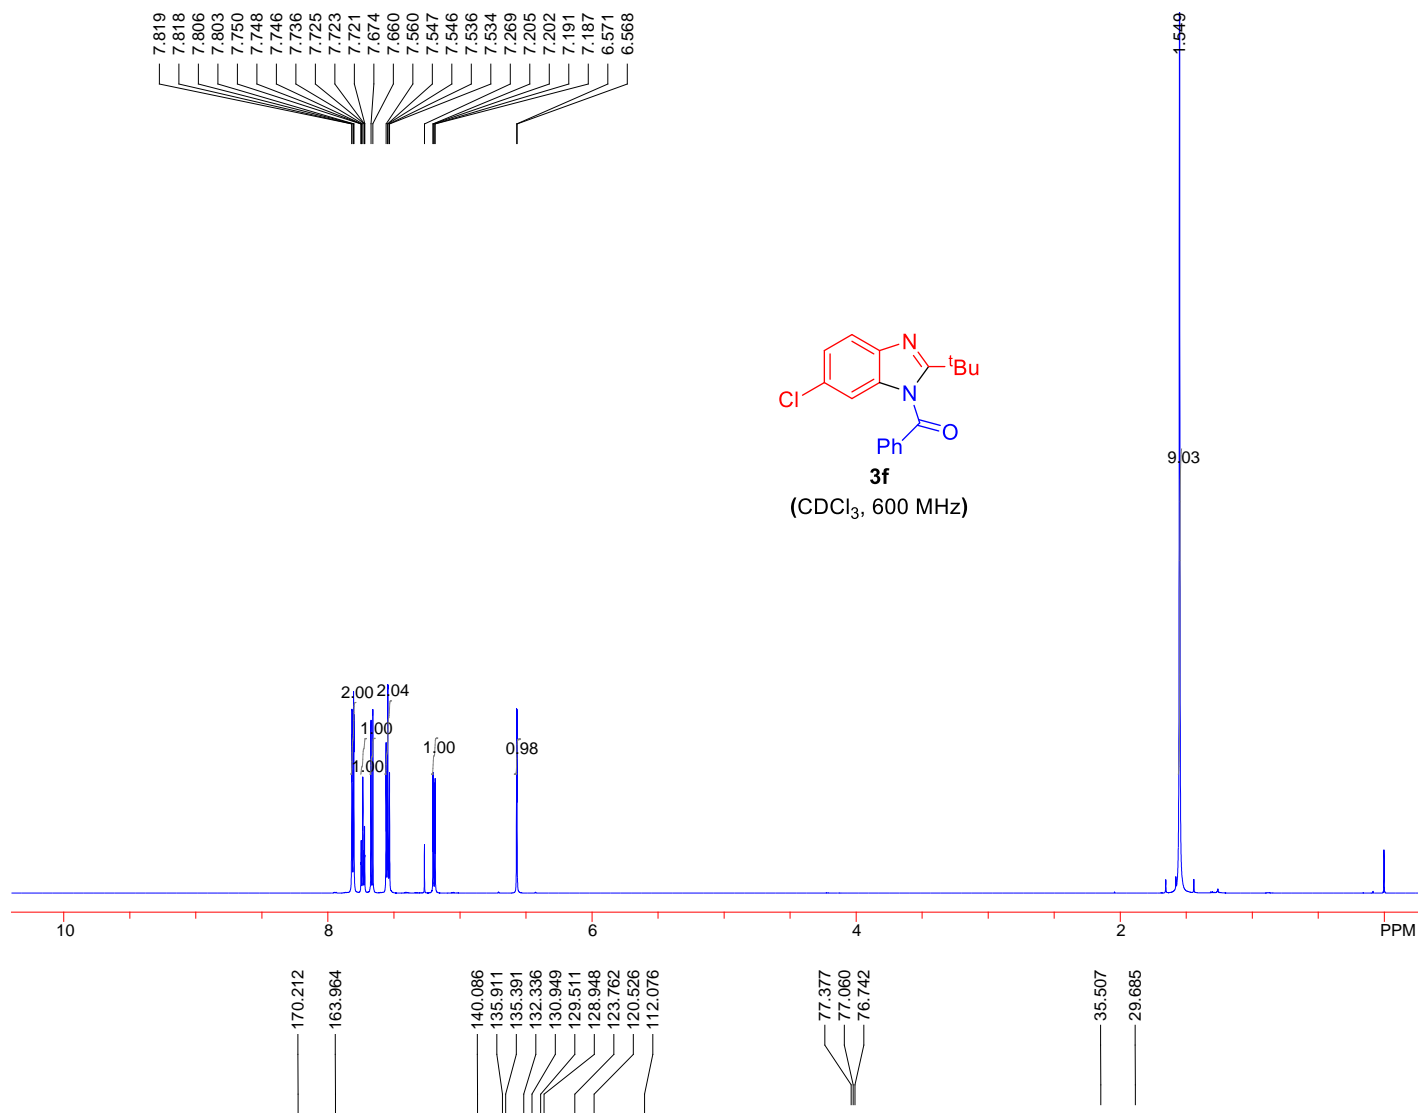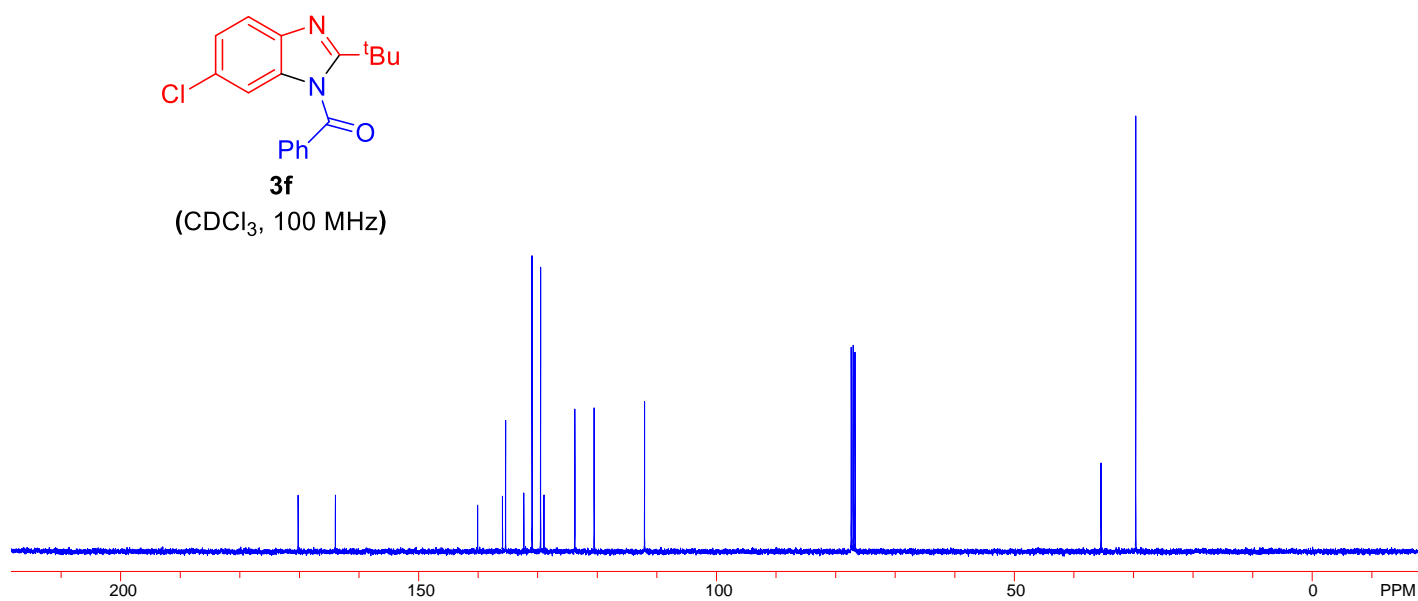

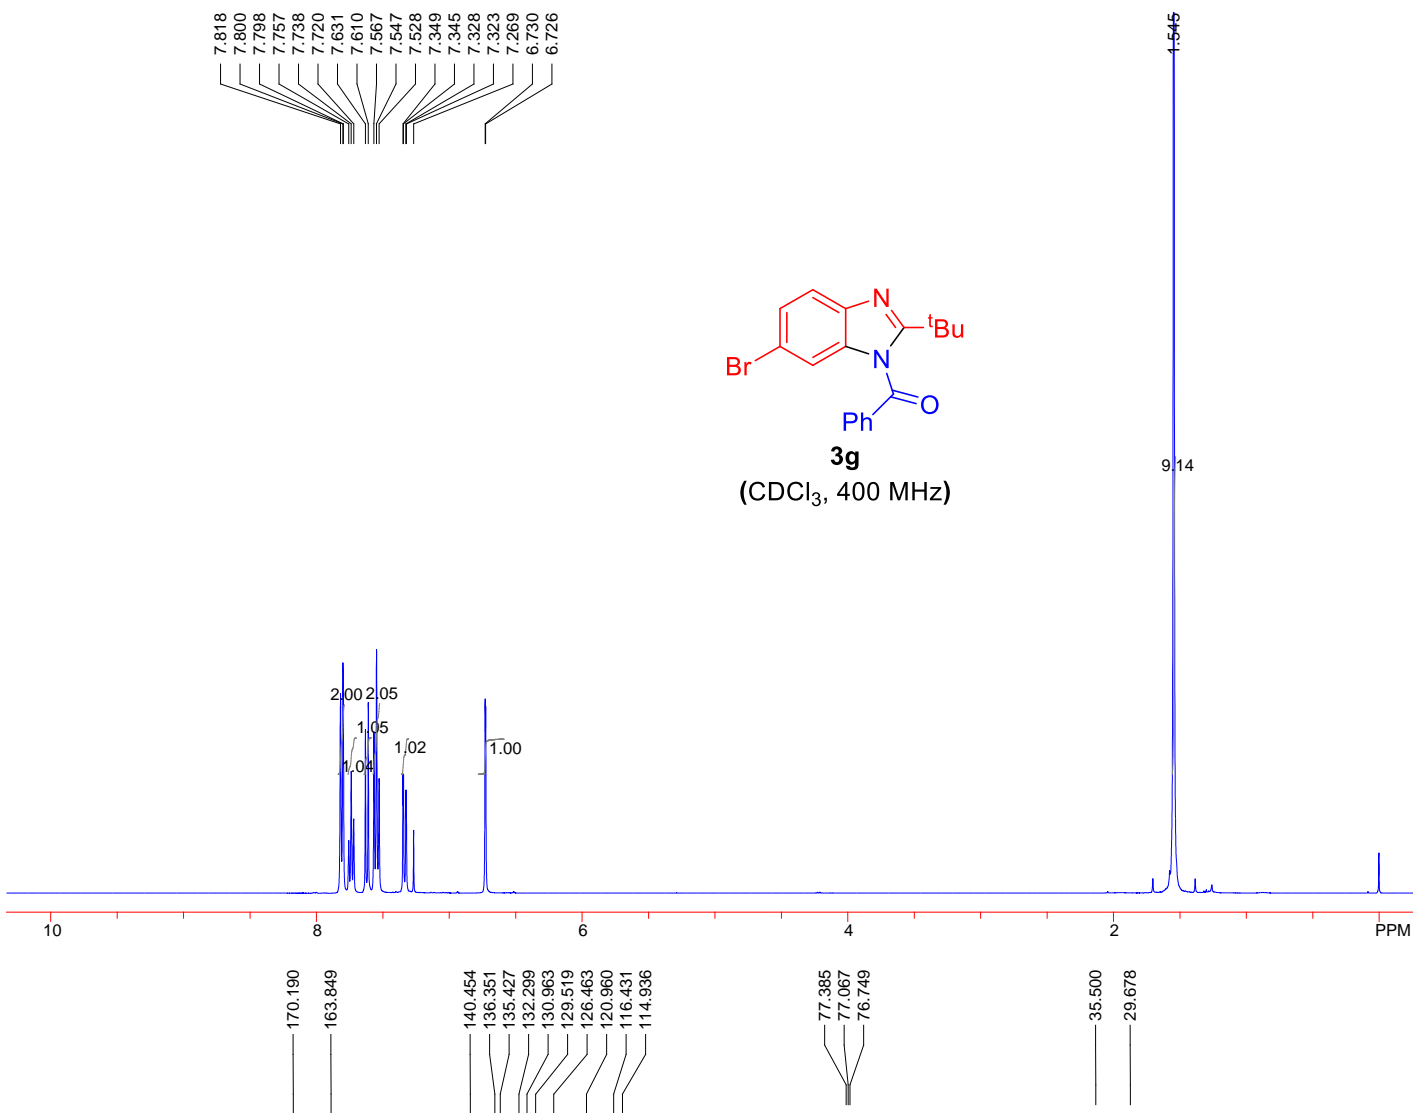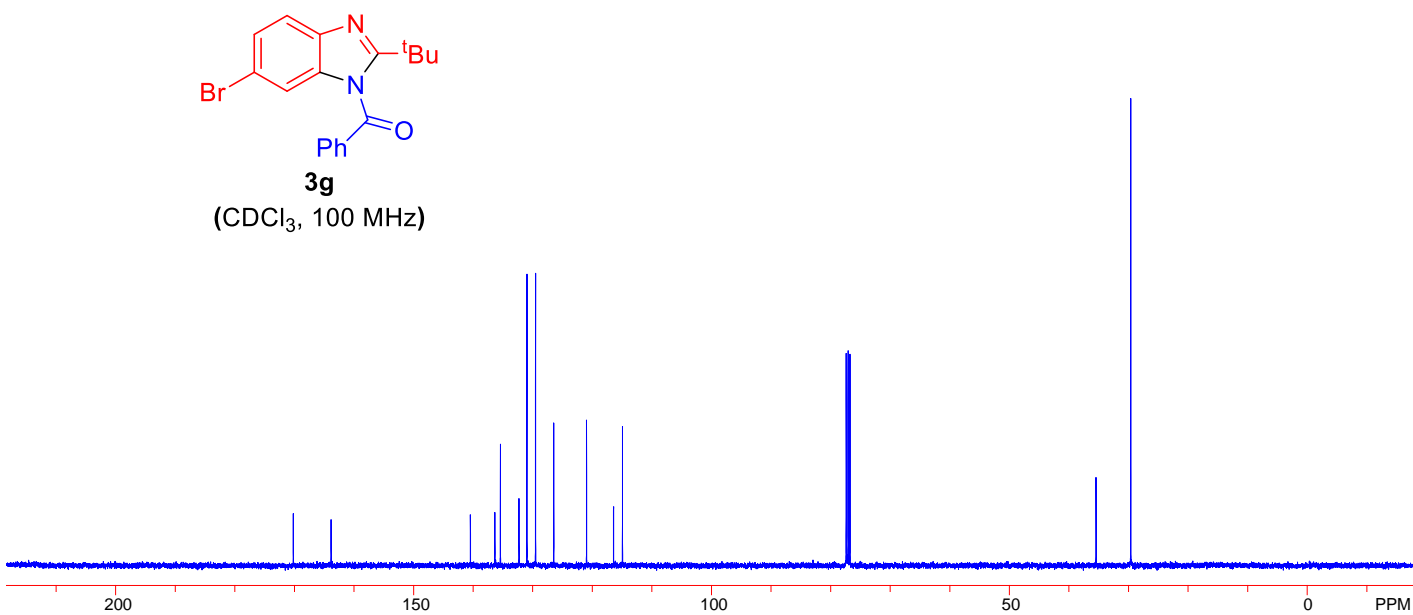



7.810  
7.808  
7.796  
7.794  
7.757  
7.744  
7.734  
7.732  
7.730  
7.565  
7.553  
7.552  
7.539  
7.534  
7.520  
7.517  
7.263  
6.917

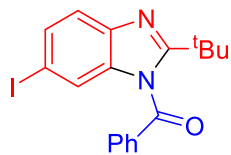

**3h**  
(CDCl<sub>3</sub>, 600 MHz)

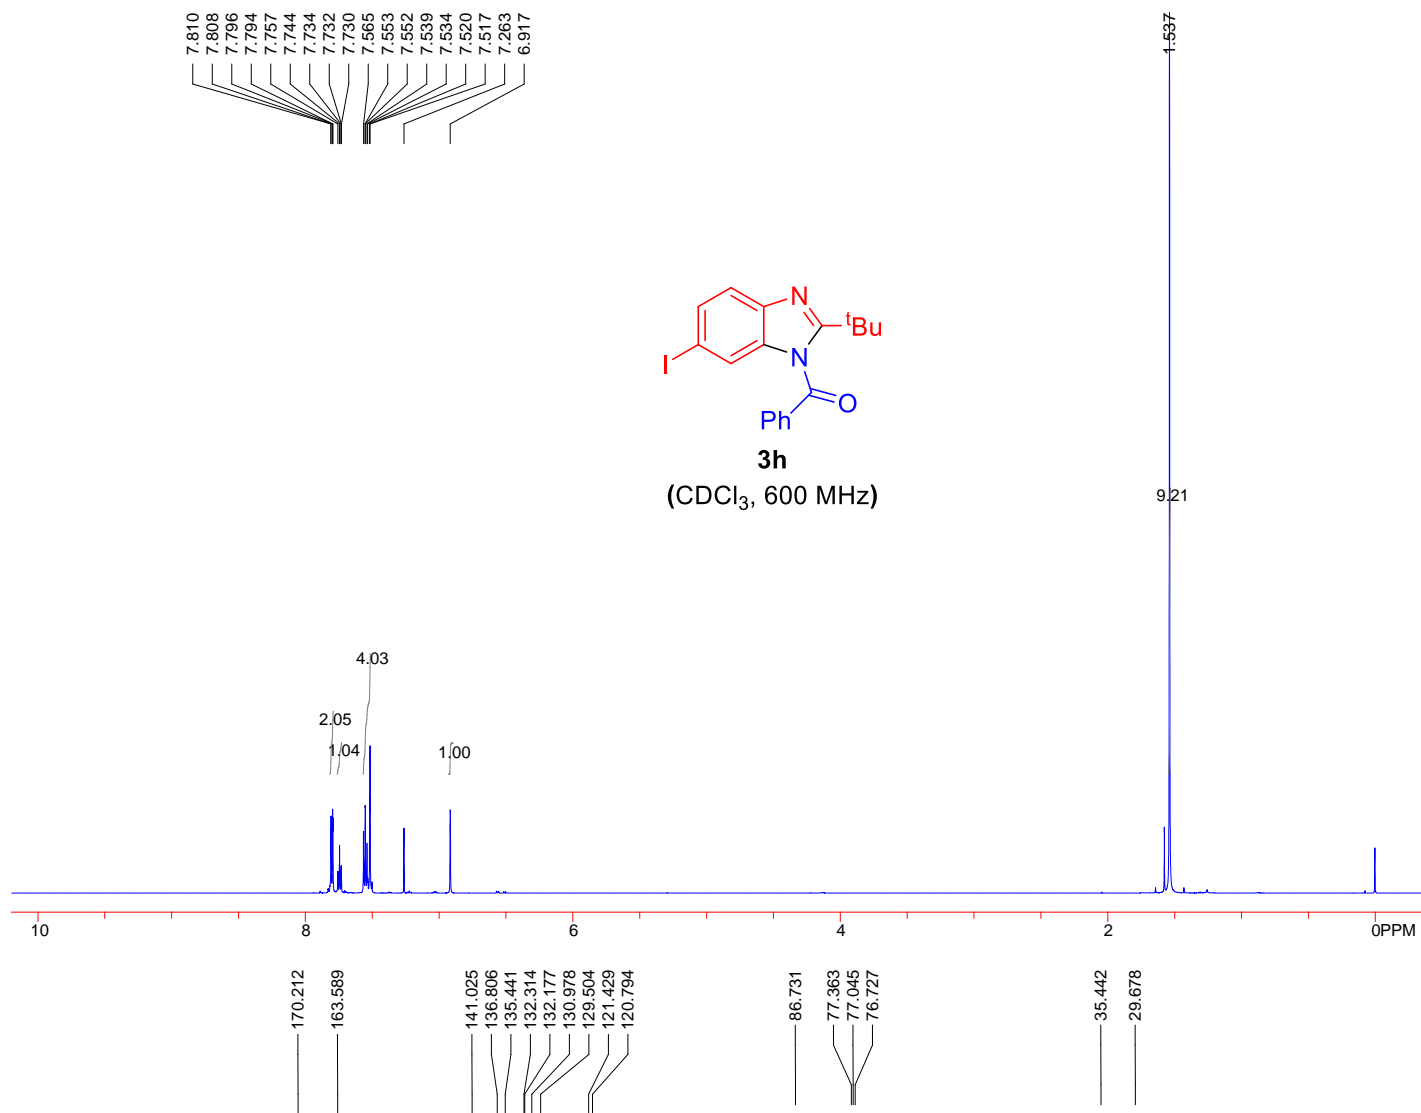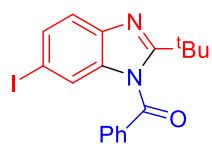

**3h**  
(CDCl<sub>3</sub>, 100 MHz)

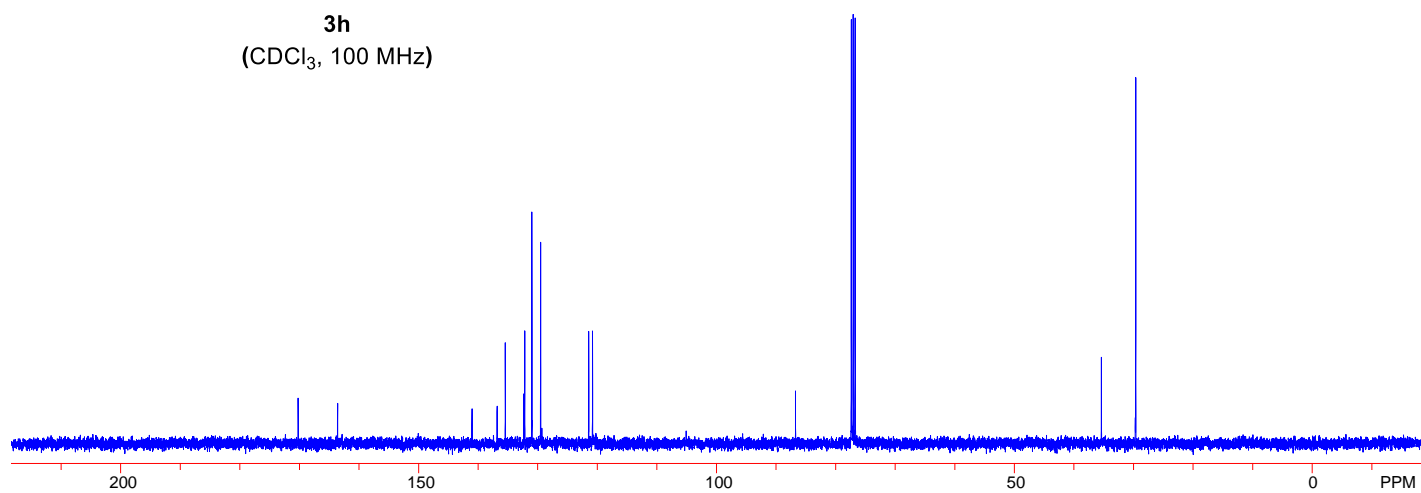

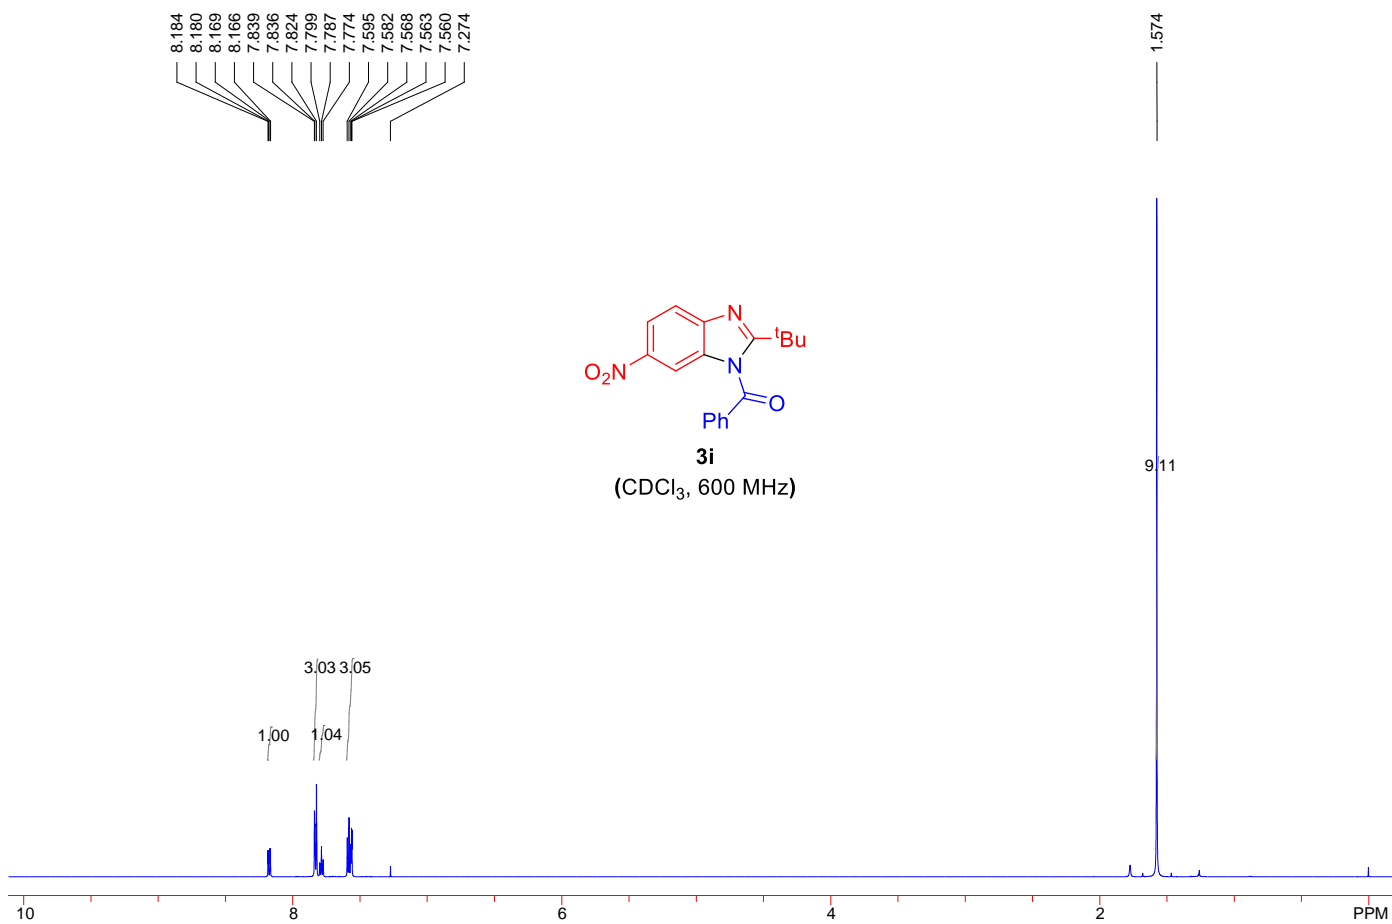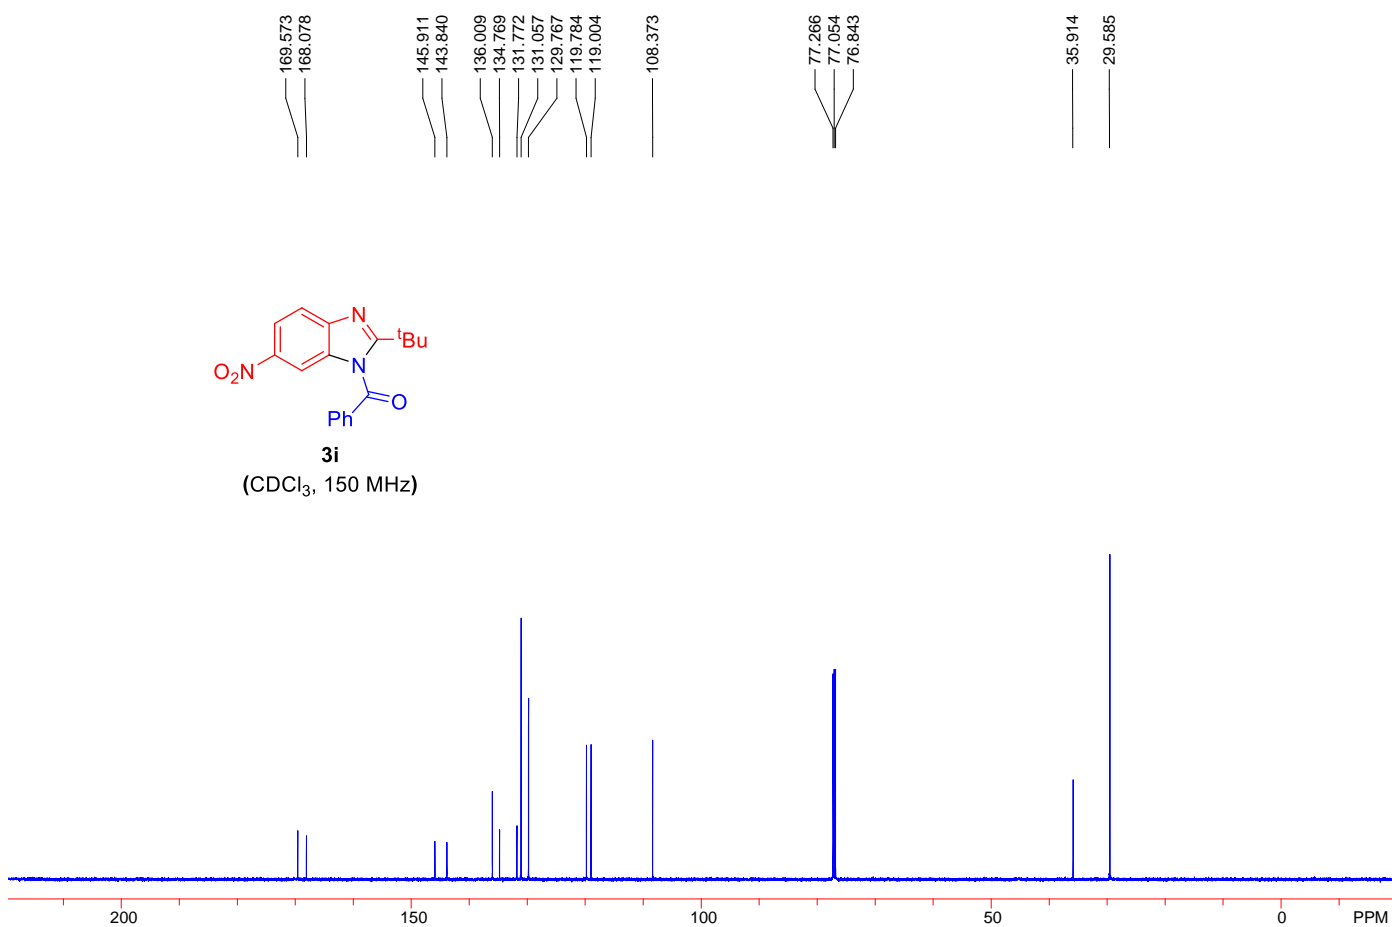

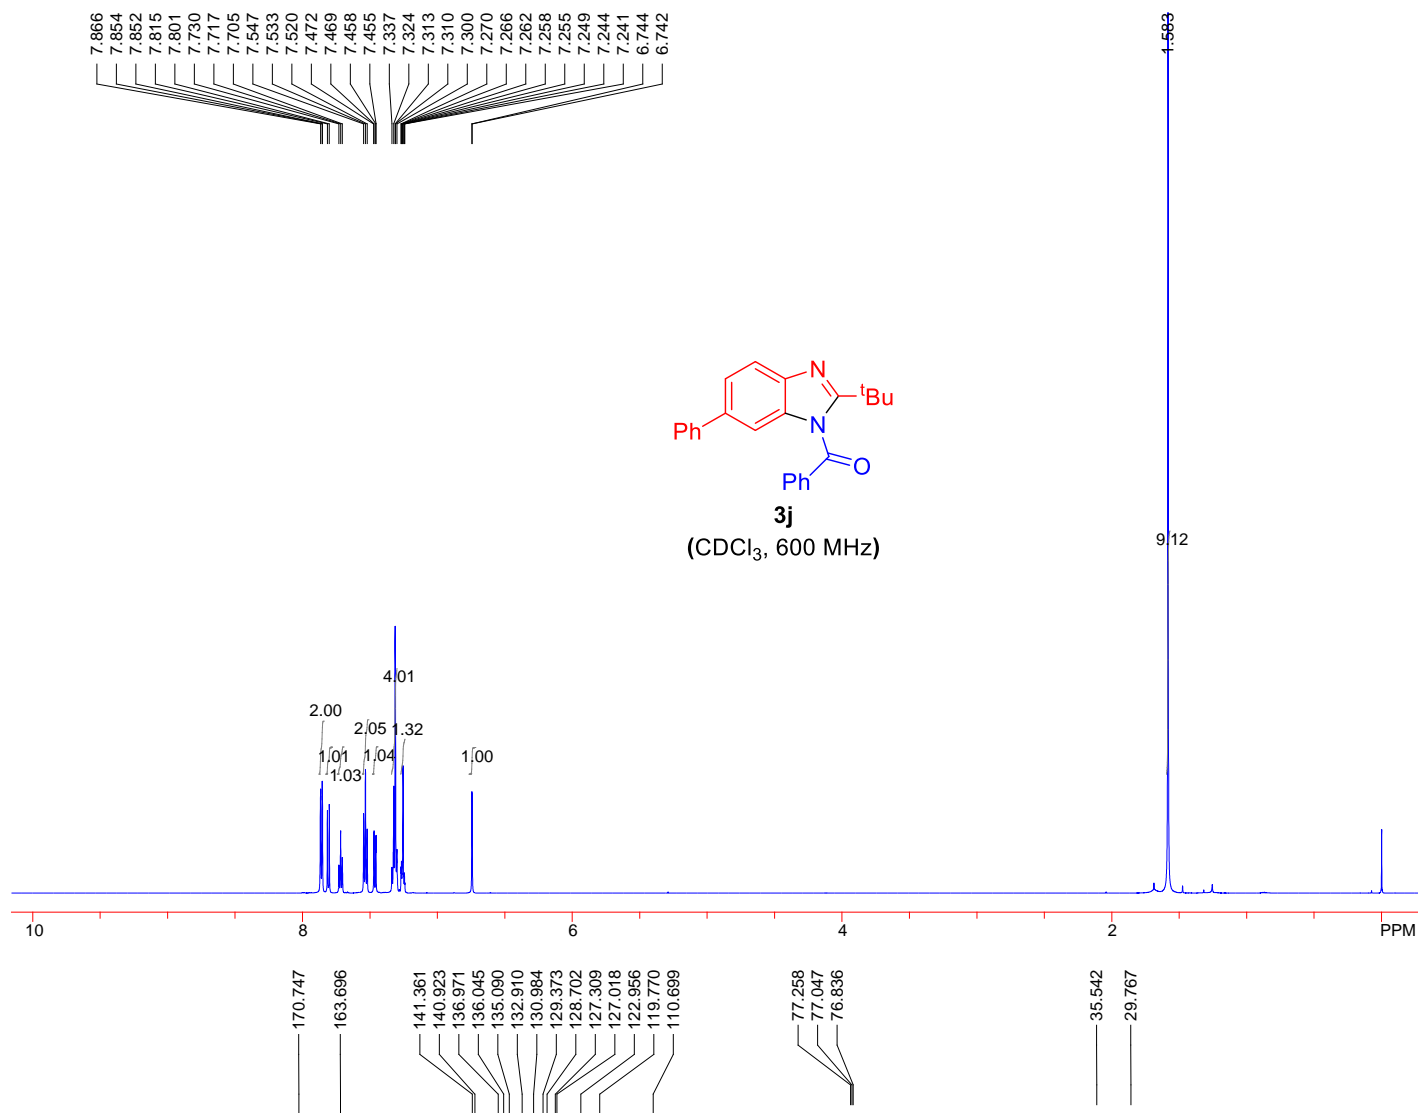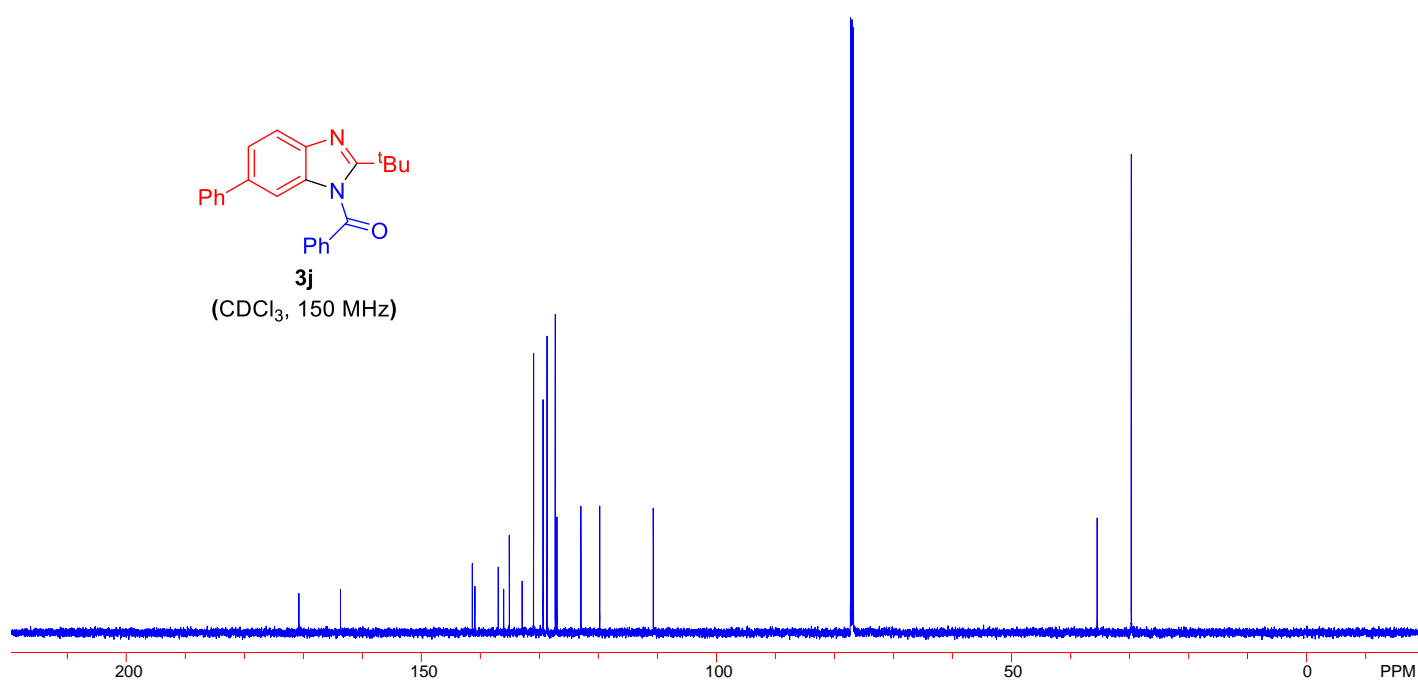

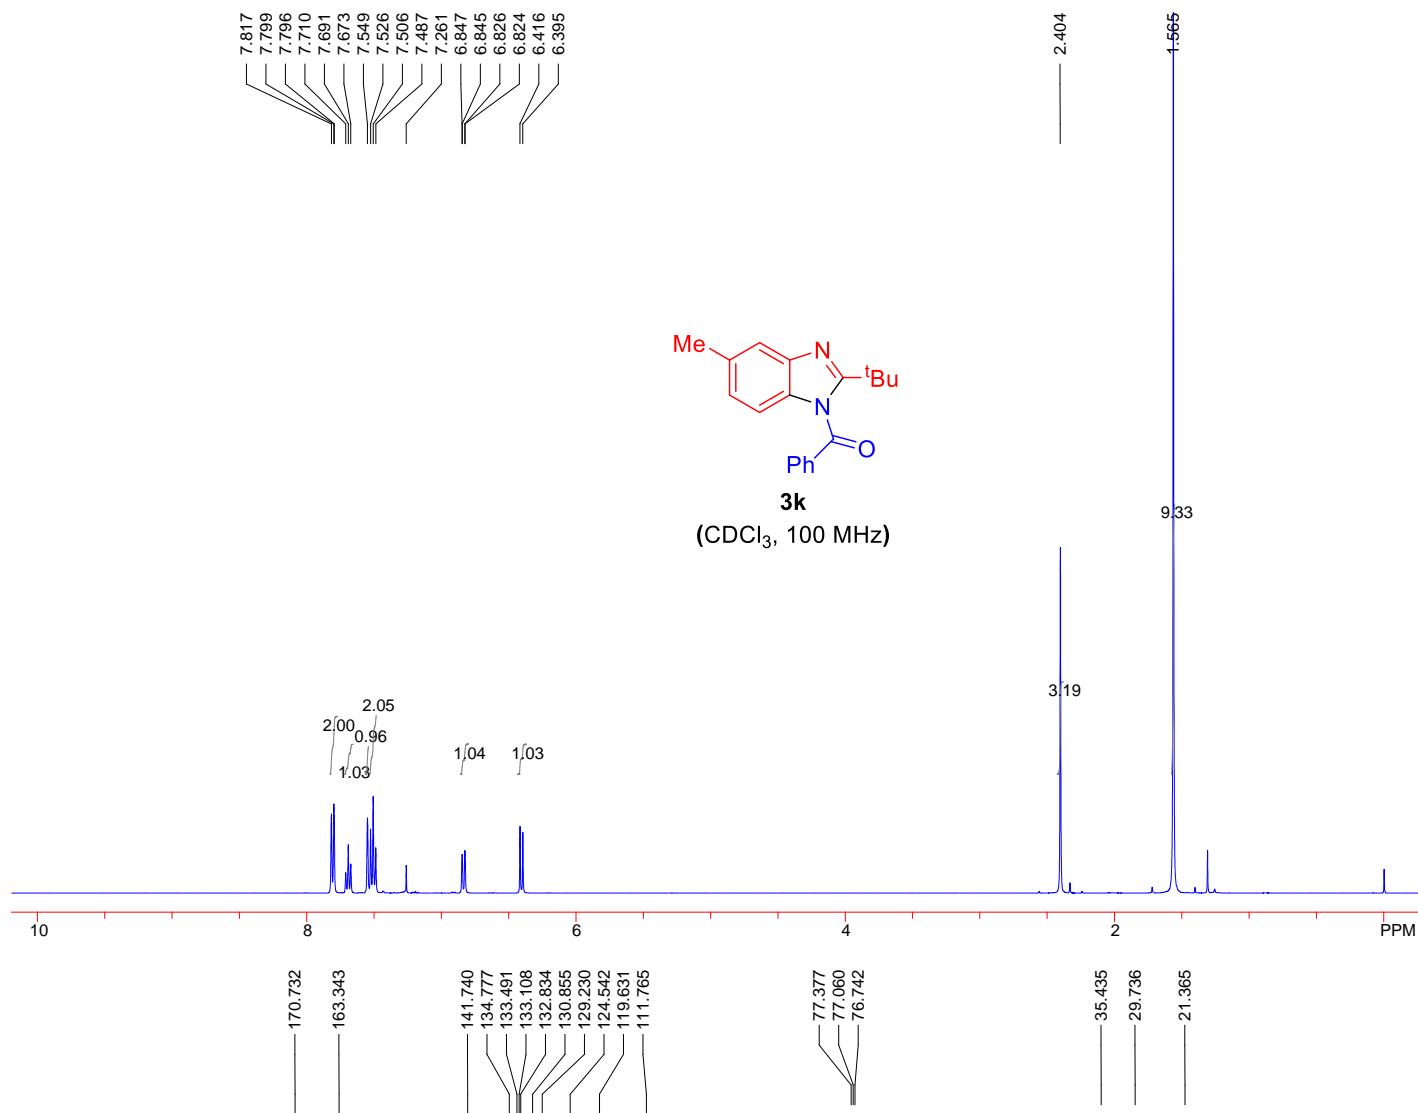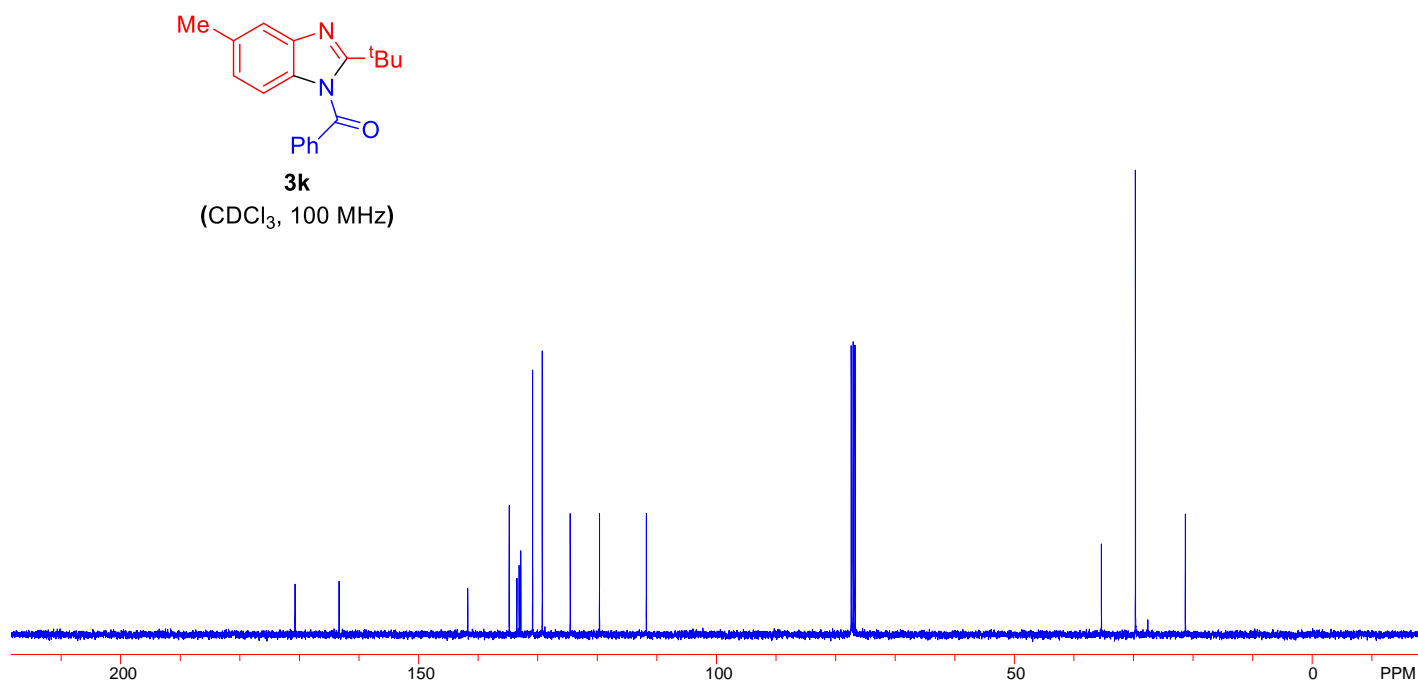

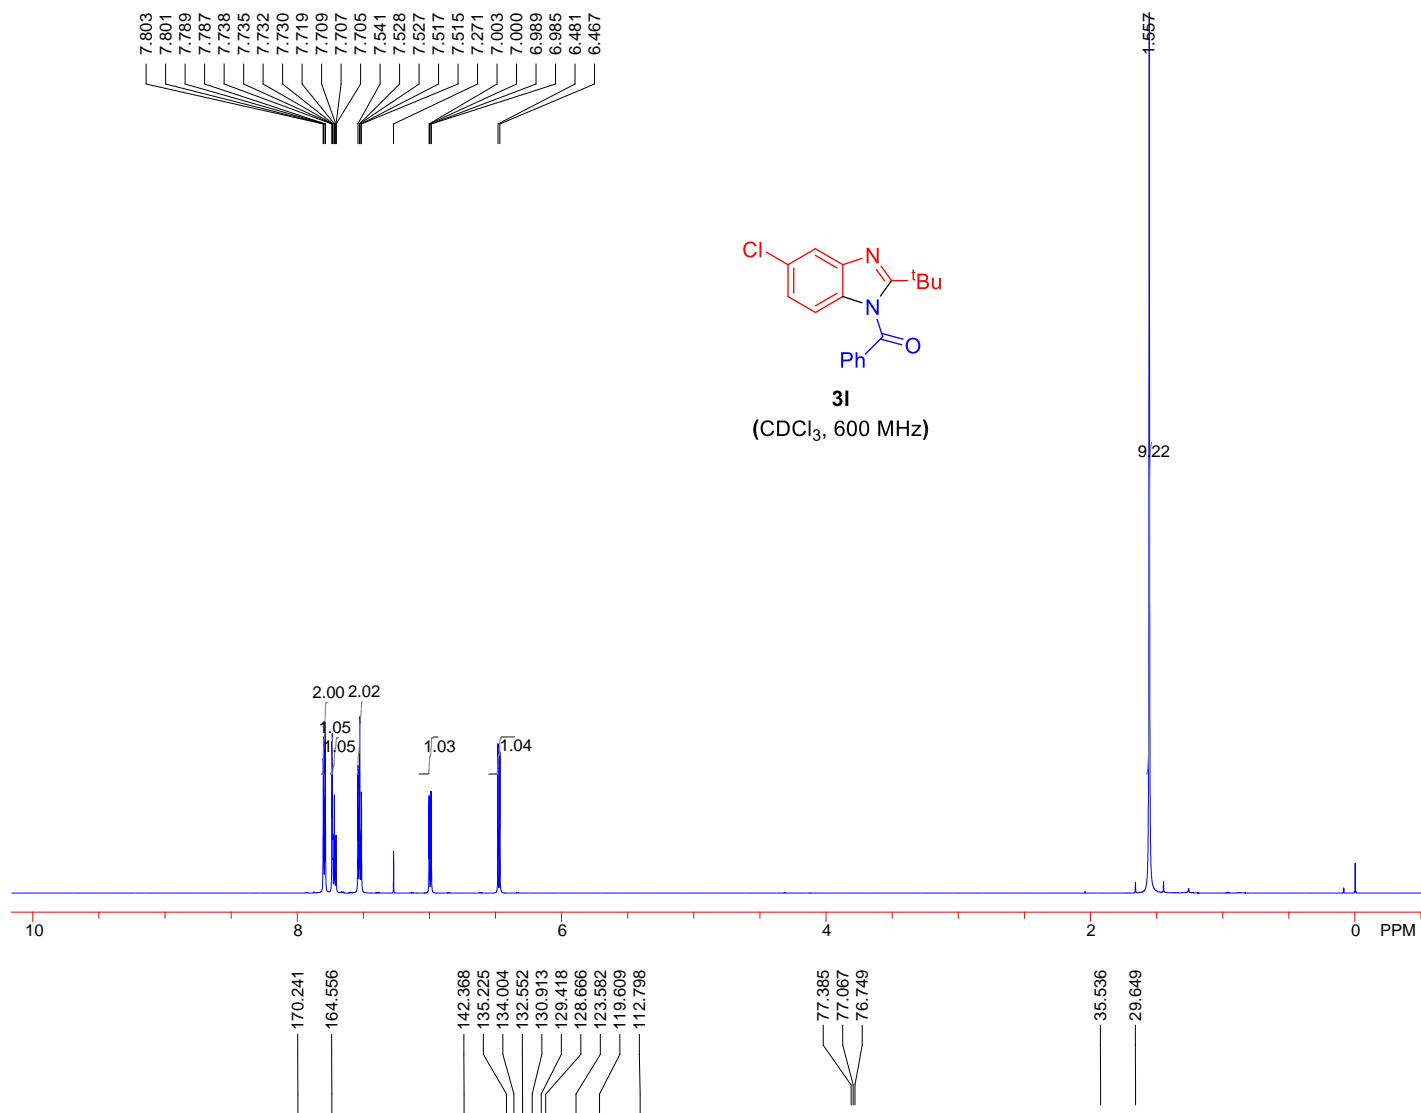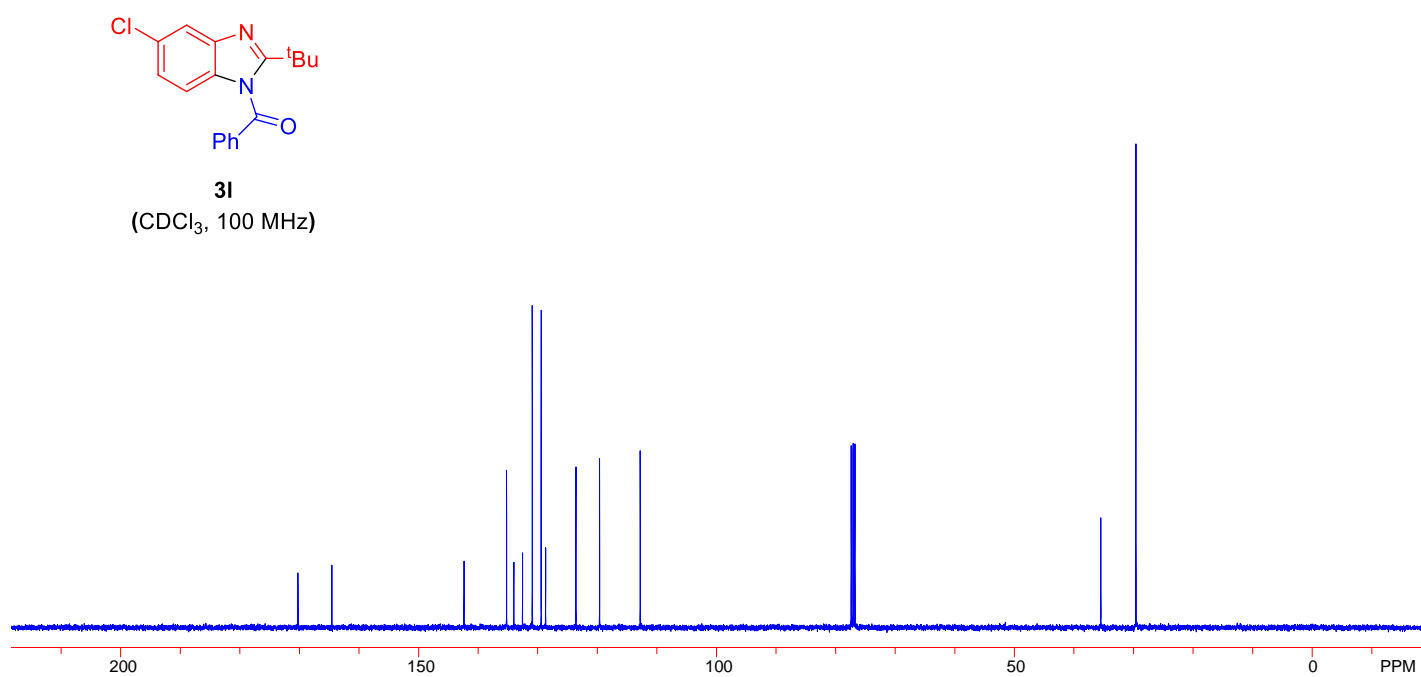

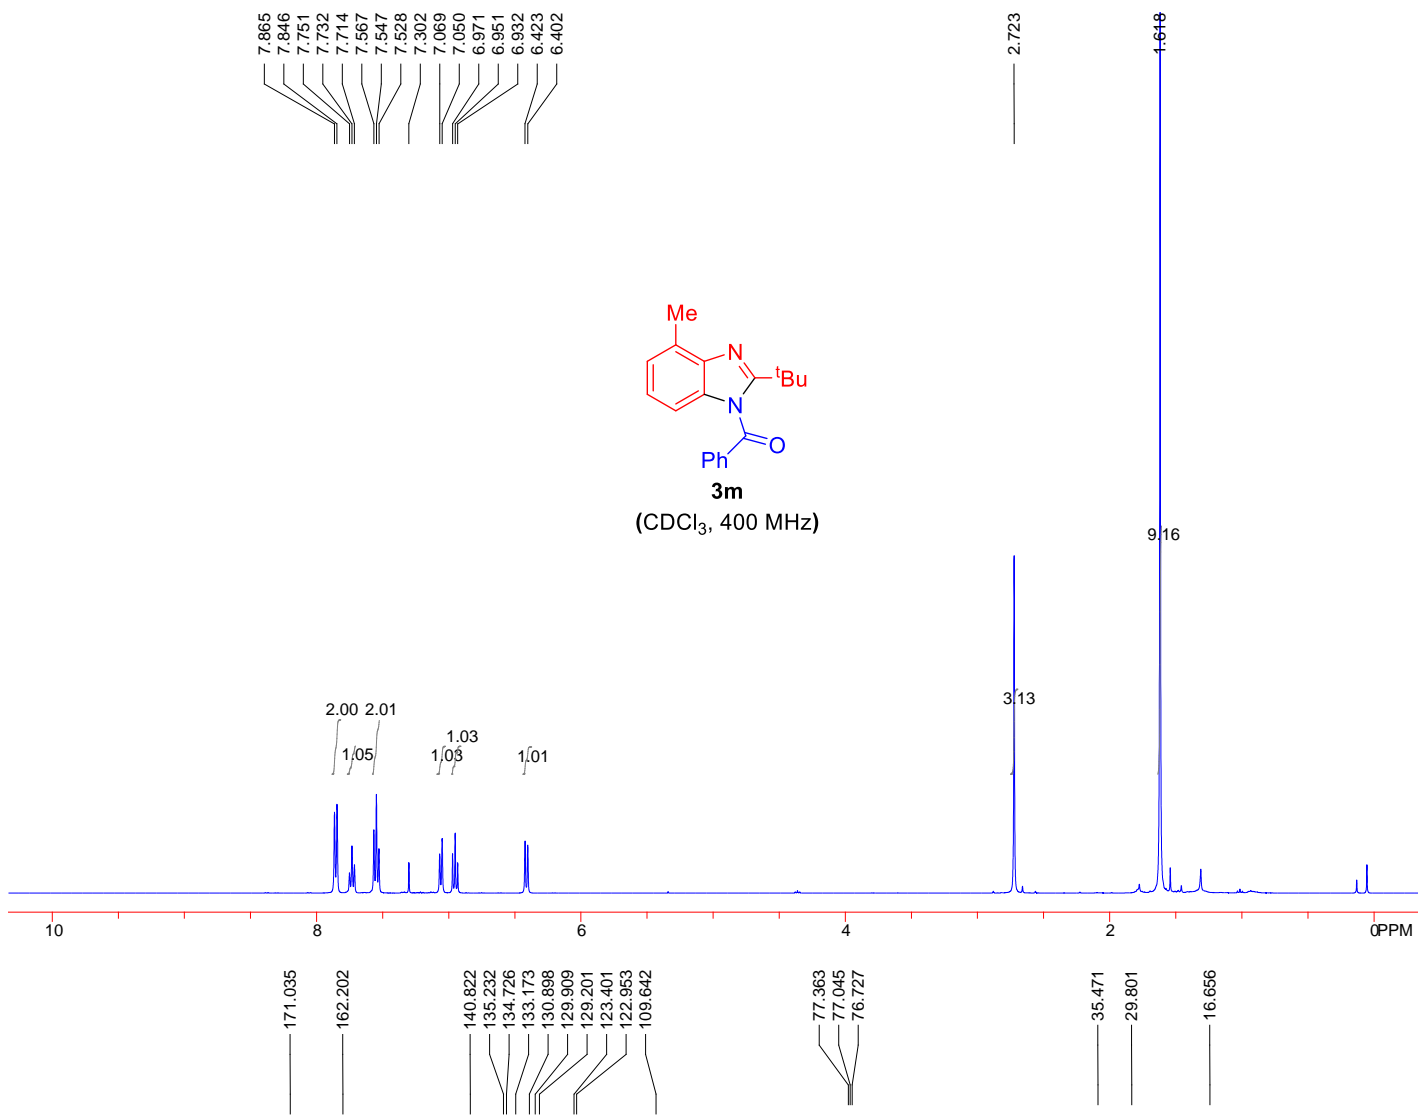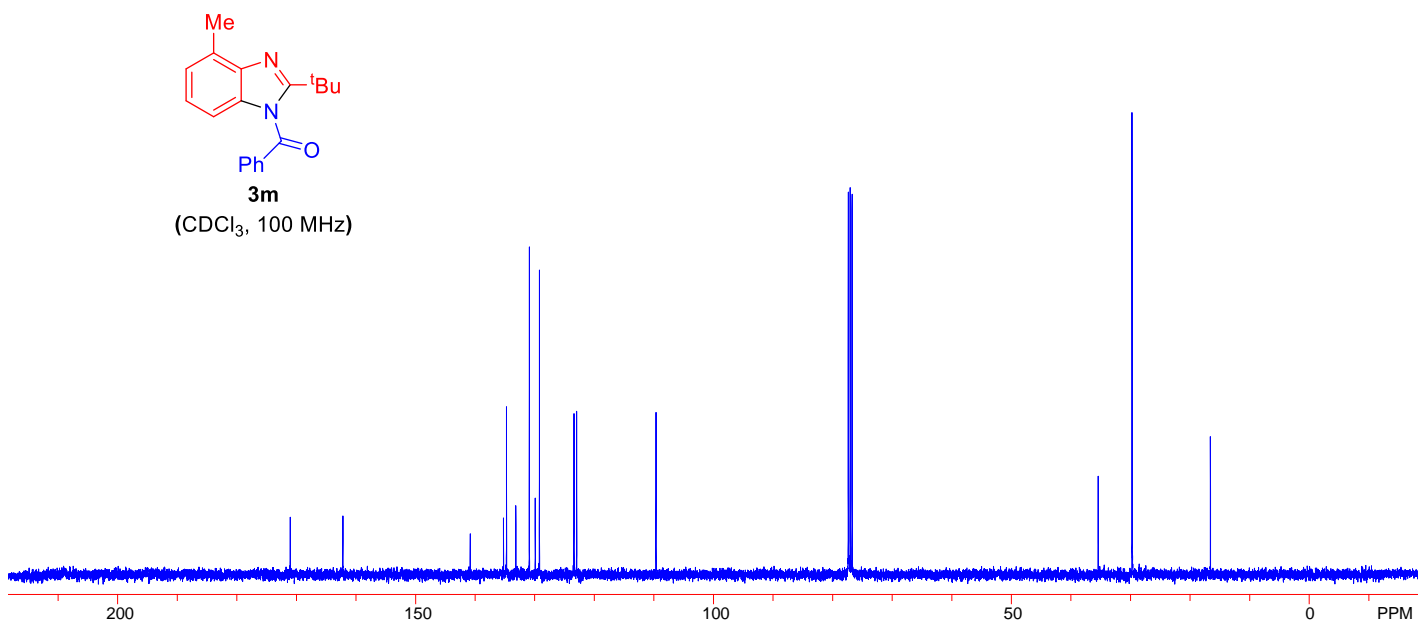

7.799  
7.797  
7.788  
7.785  
7.783  
7.729  
7.727  
7.725  
7.714  
7.704  
7.702  
7.700  
7.534  
7.531  
7.521  
7.520  
7.511  
7.508  
7.260  
7.236  
7.235  
7.223  
7.222  
6.959  
6.945  
6.932  
6.499  
6.497  
6.485  
6.484

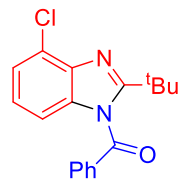

**3n**  
(CDCl<sub>3</sub>, 600 MHz)

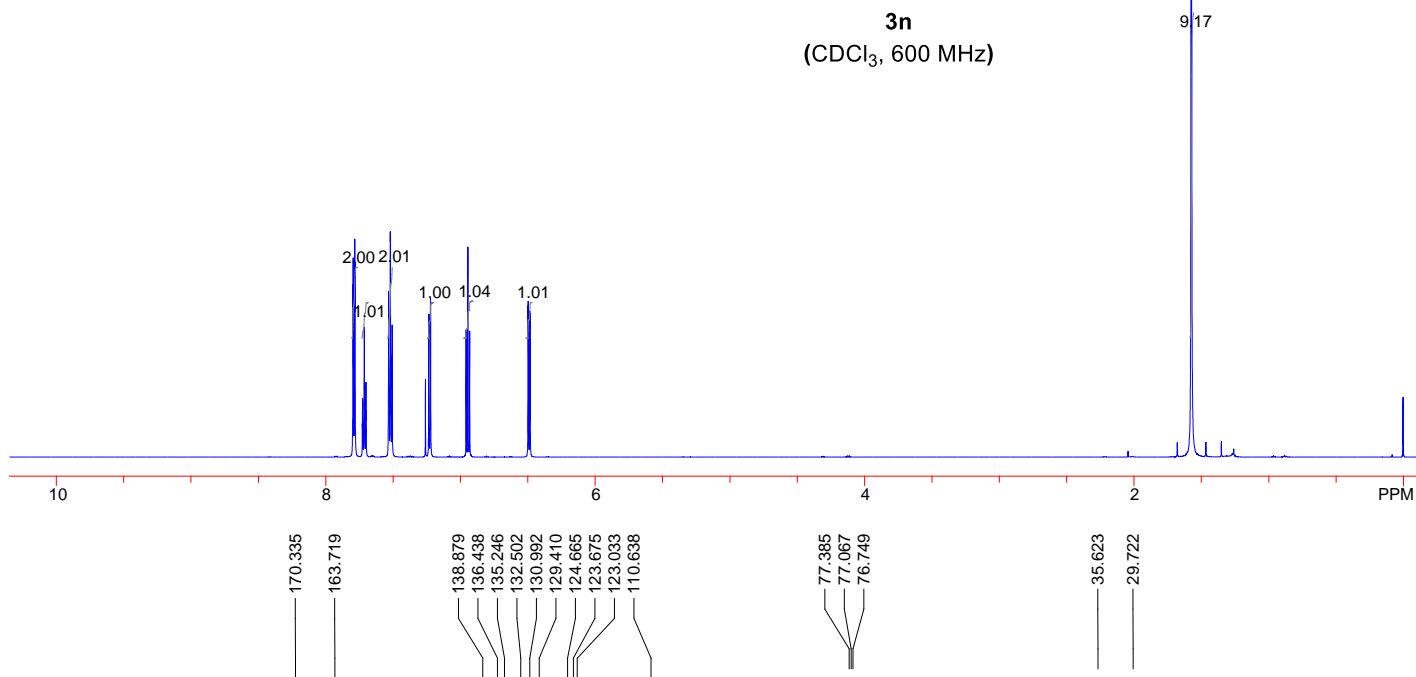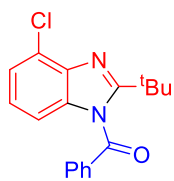

**3n**  
(CDCl<sub>3</sub>, 100 MHz)

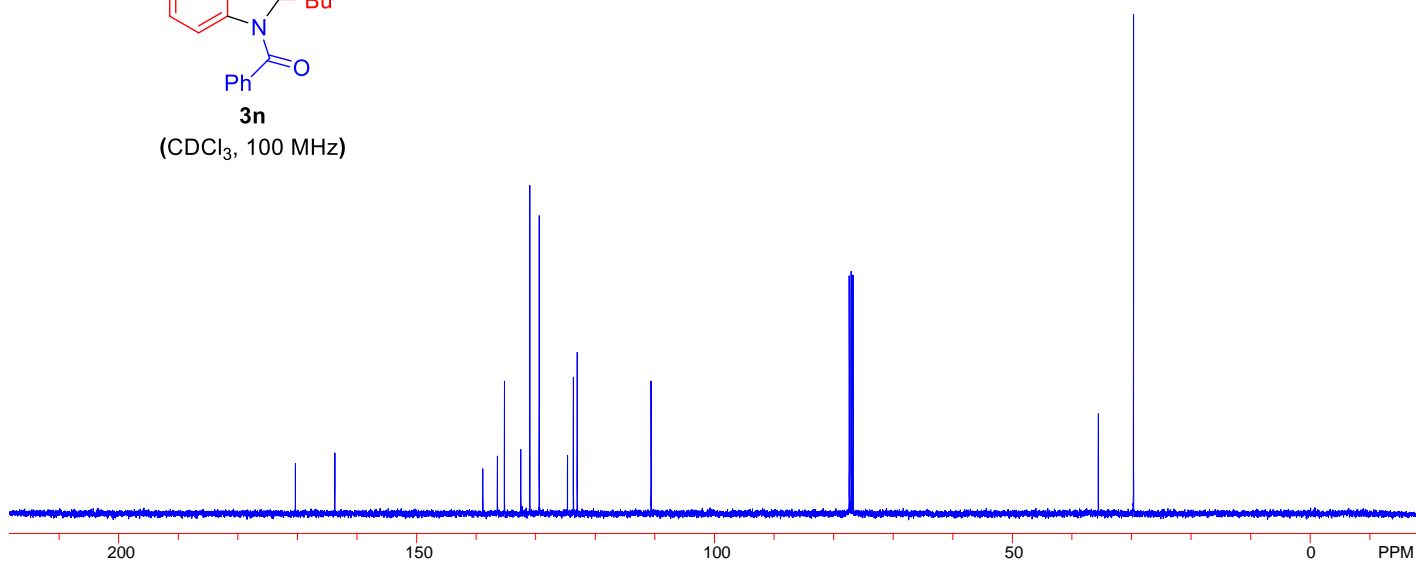

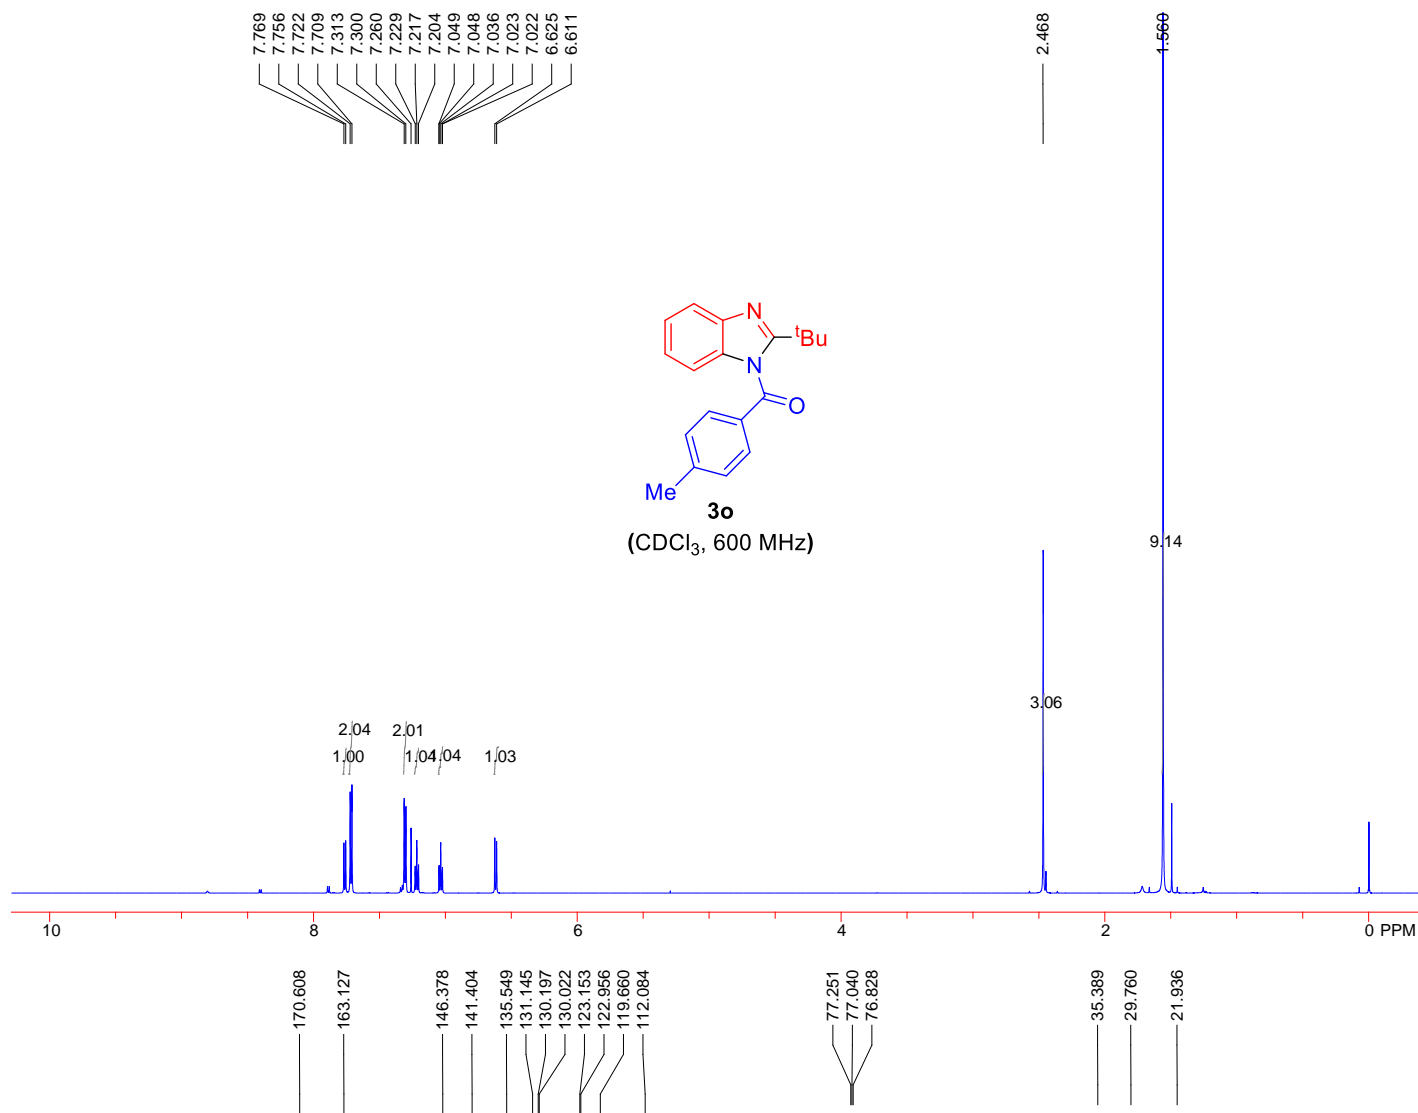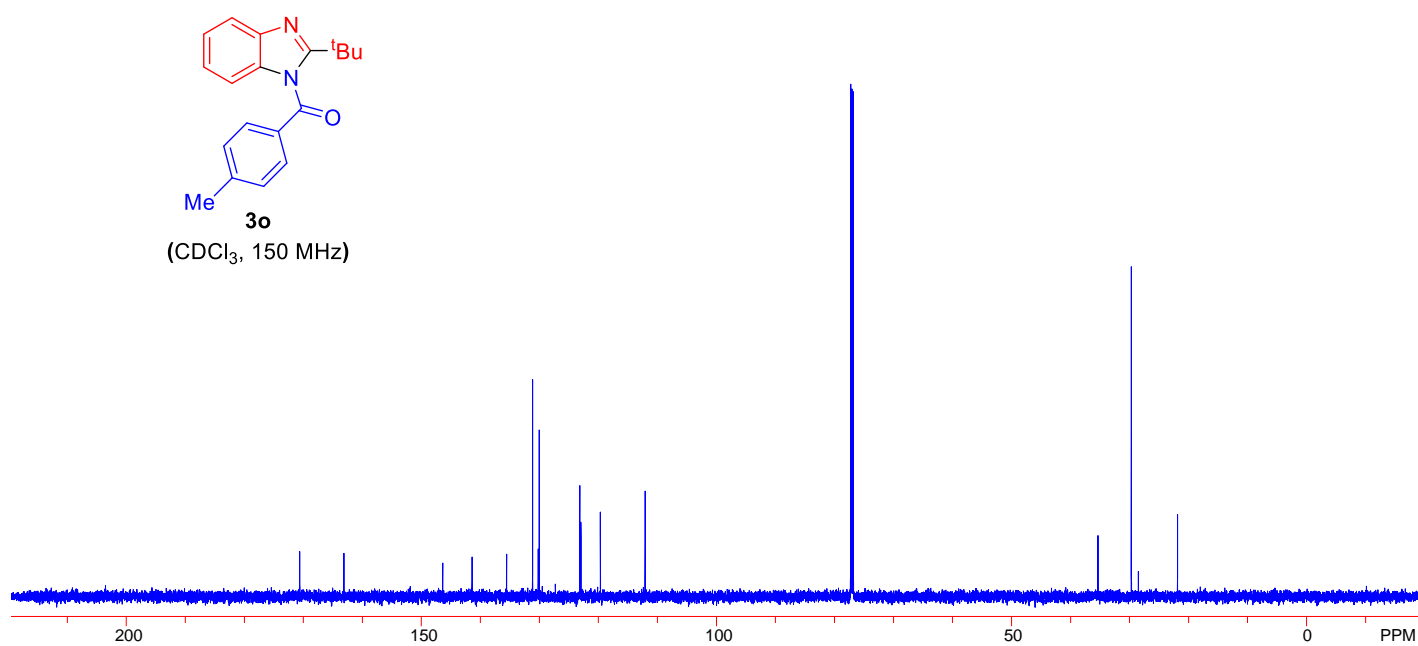



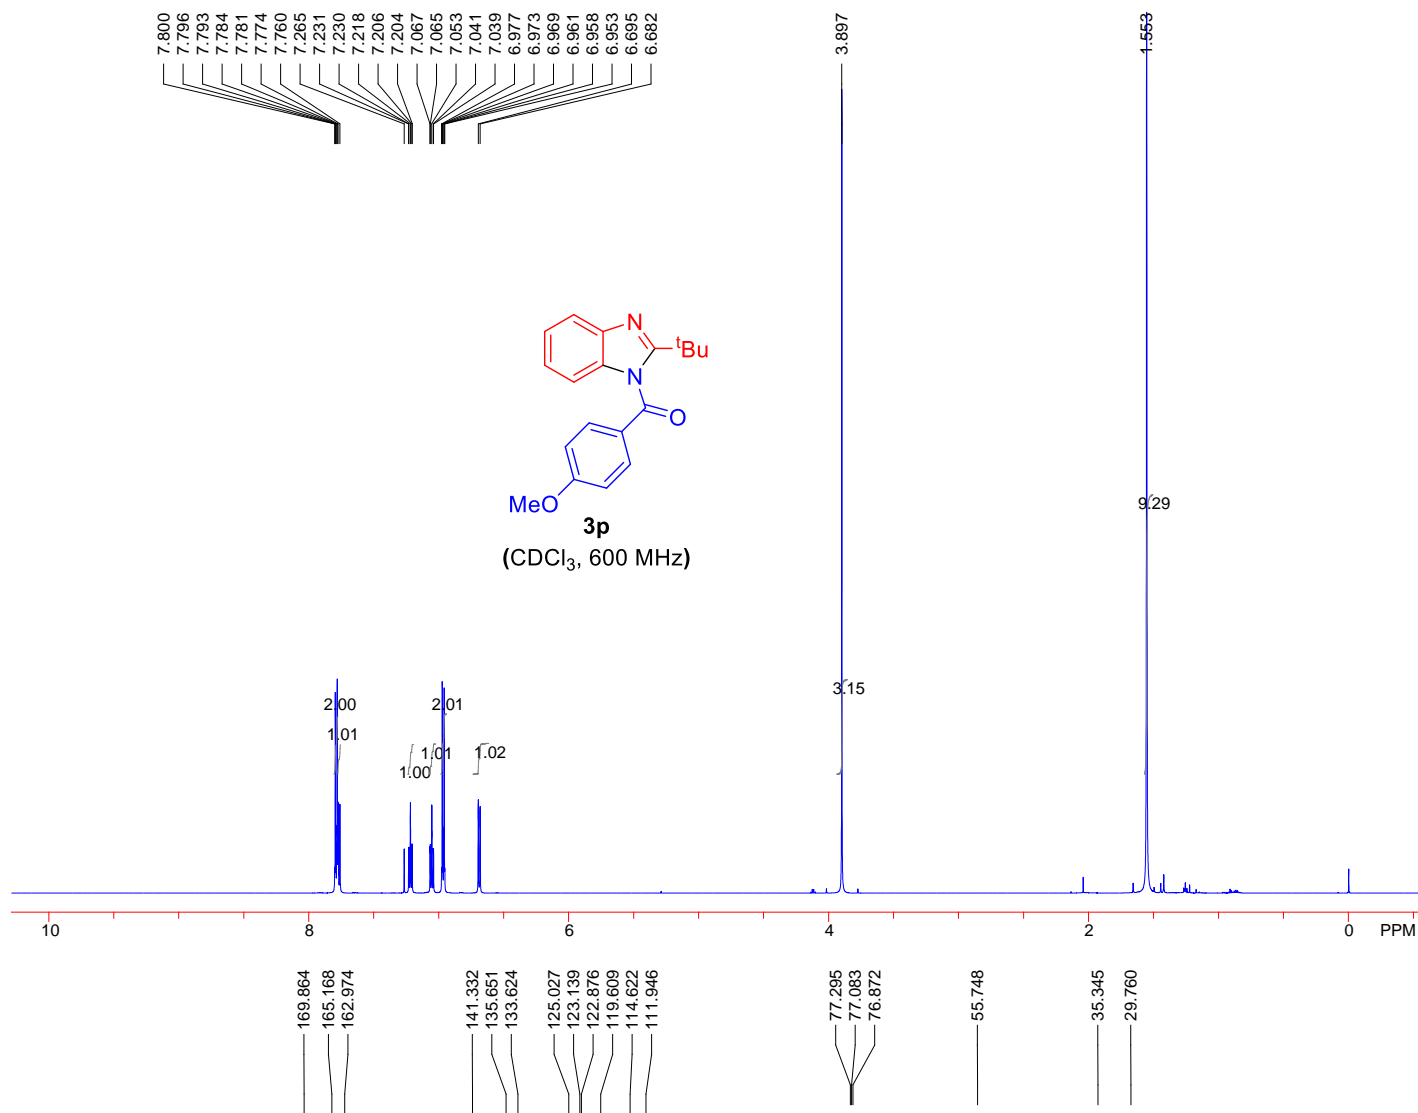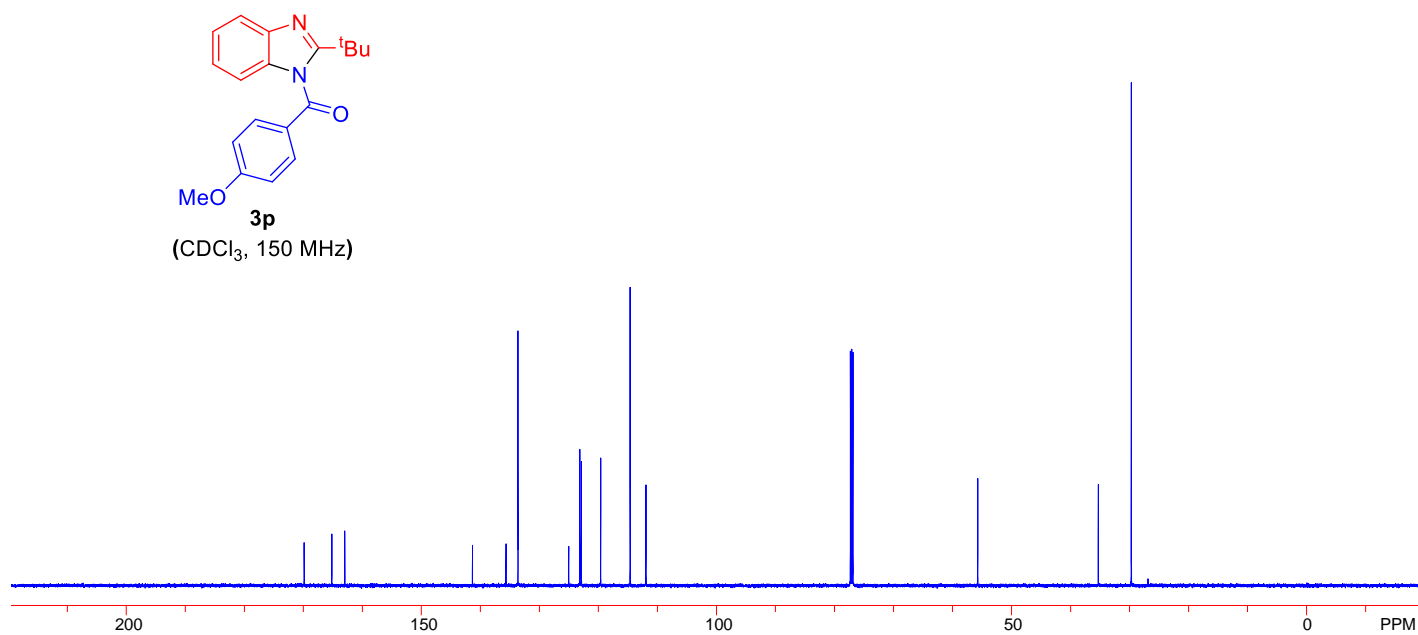

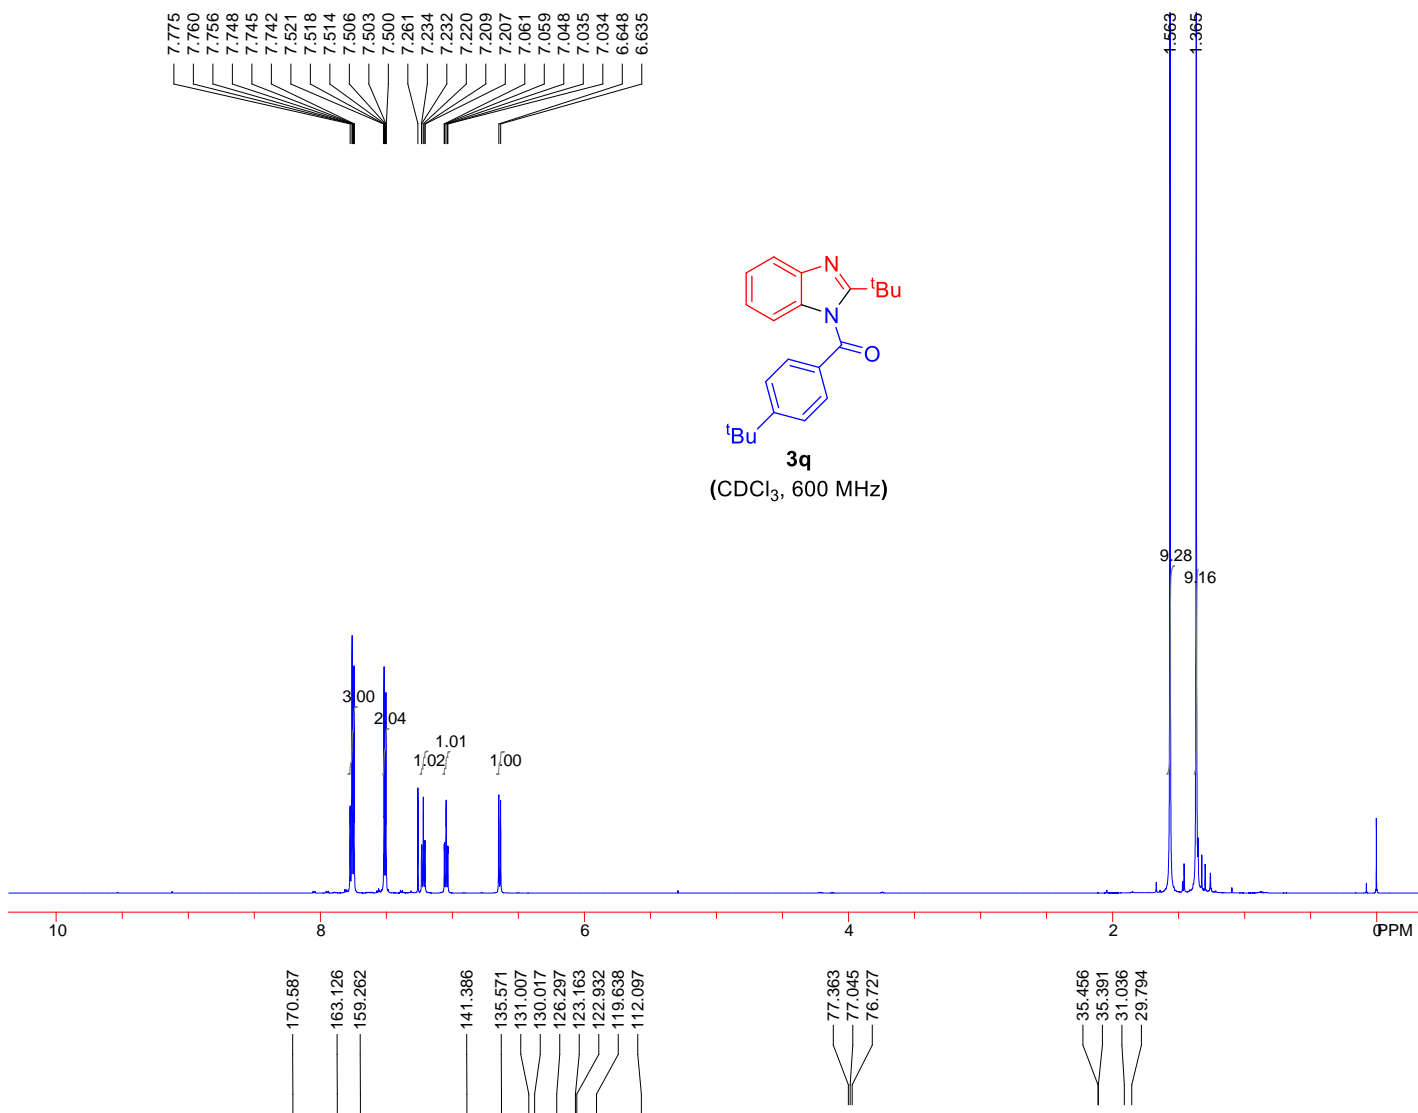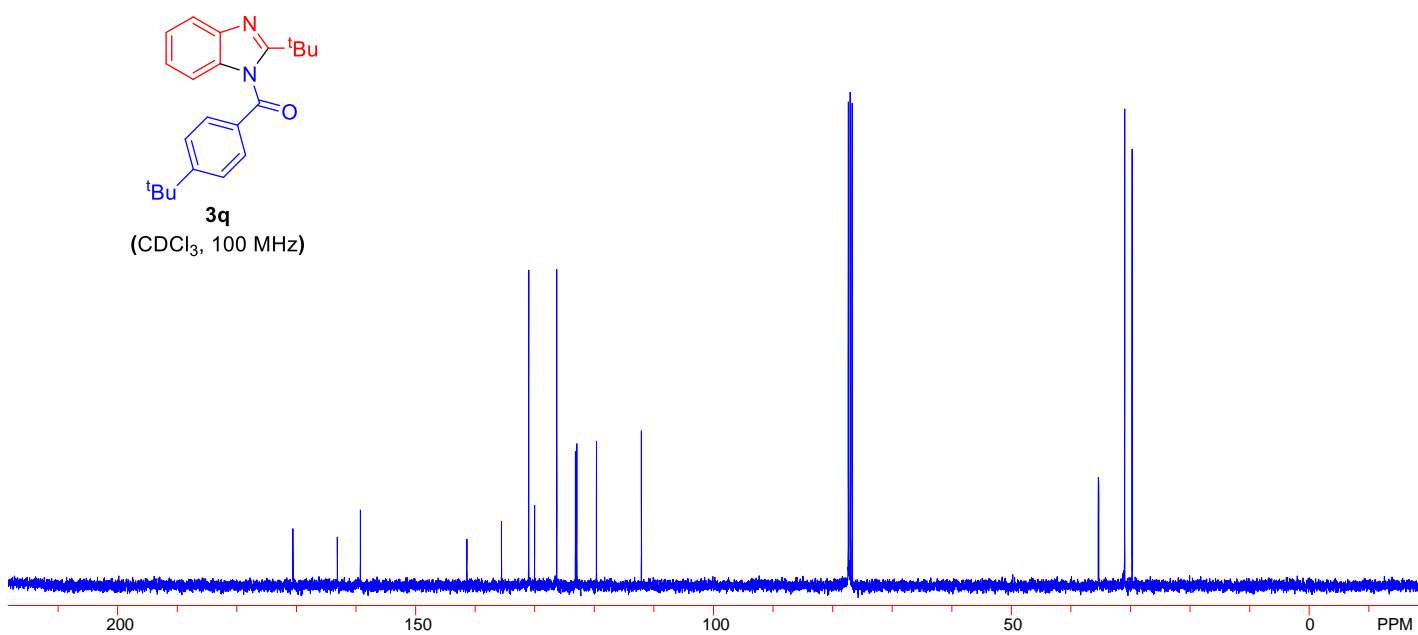

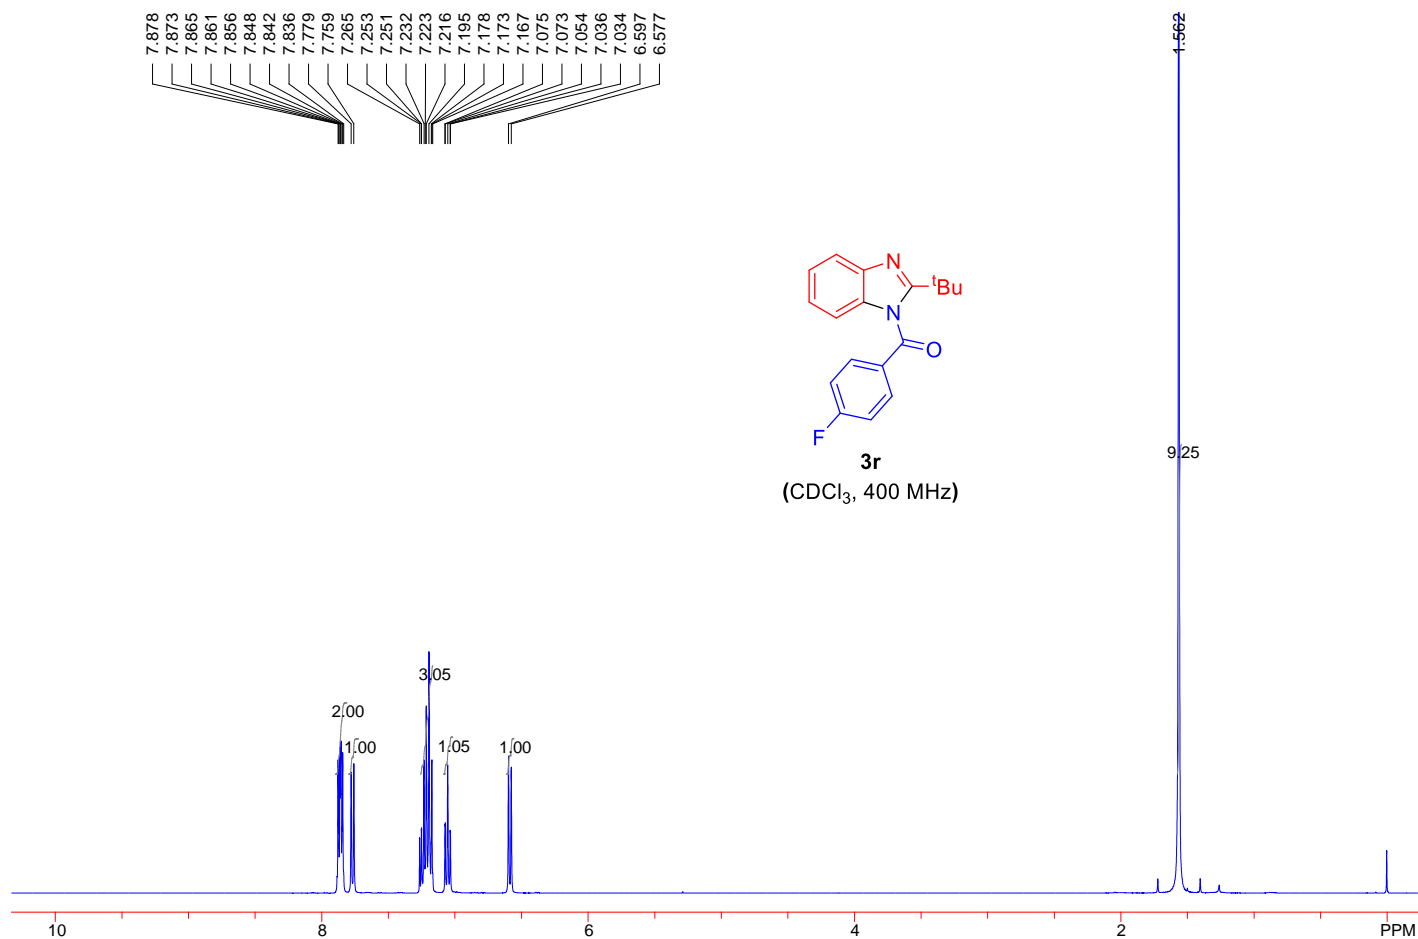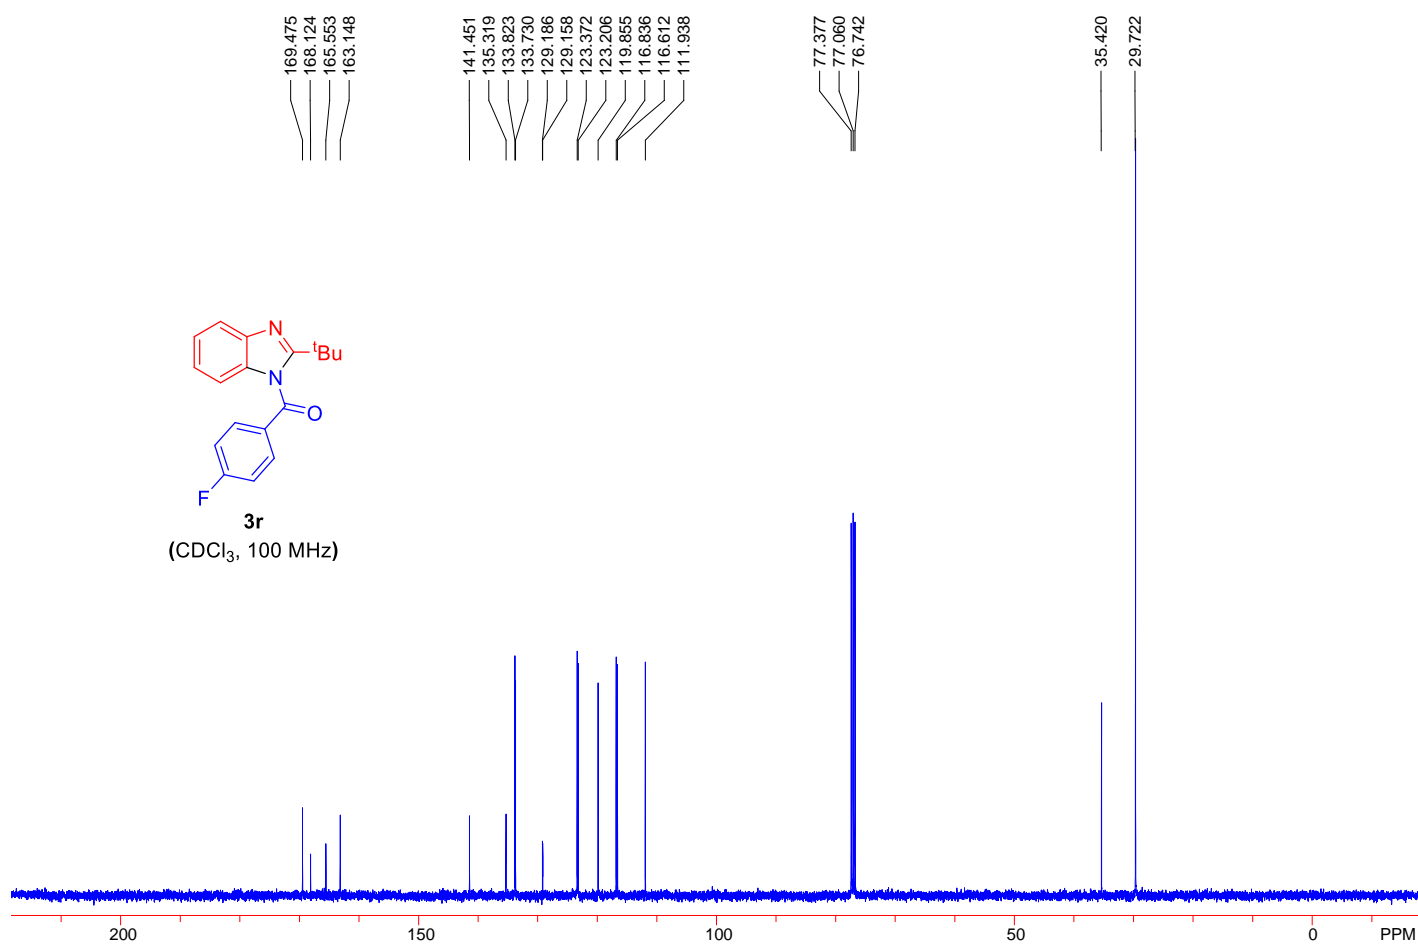

101.019  
101.034  
101.045  
101.052  
101.059  
101.066

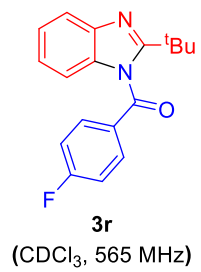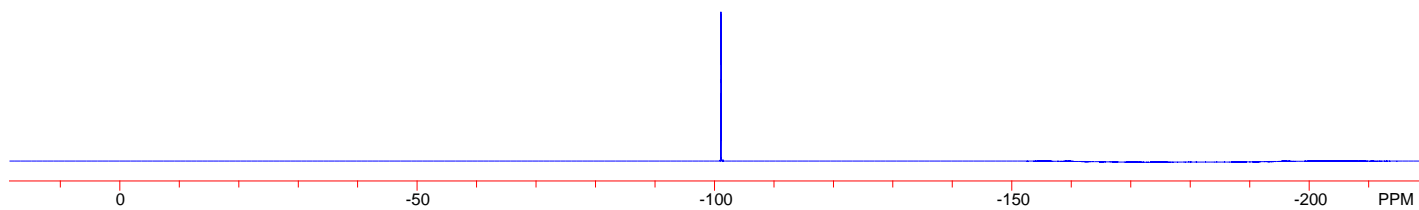

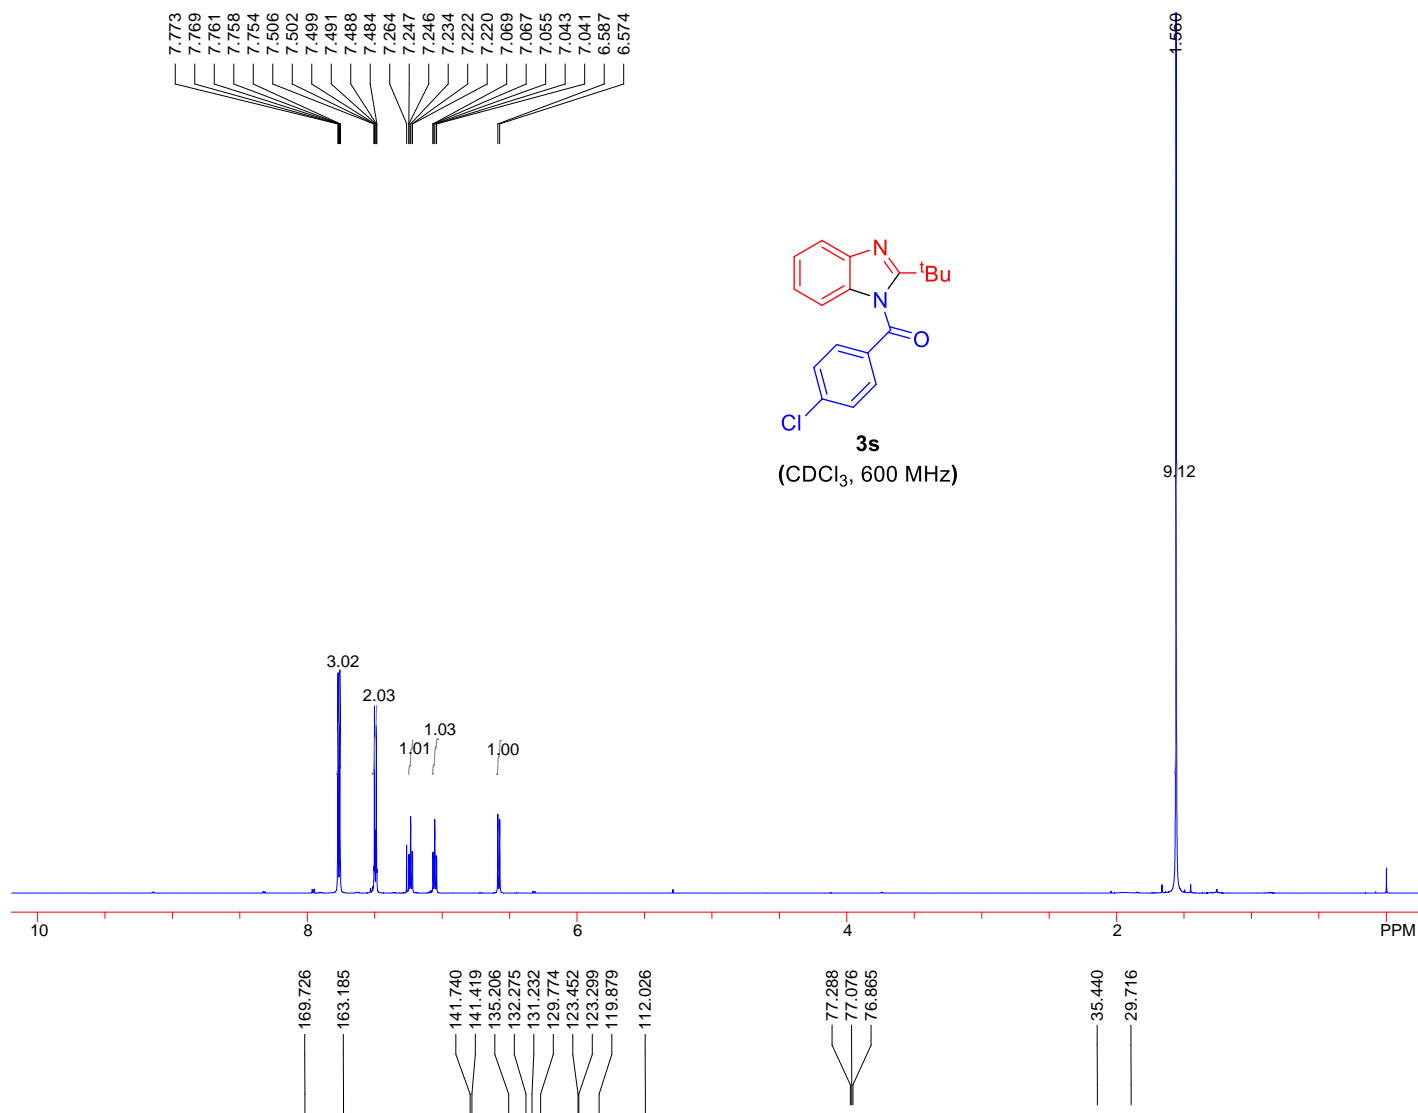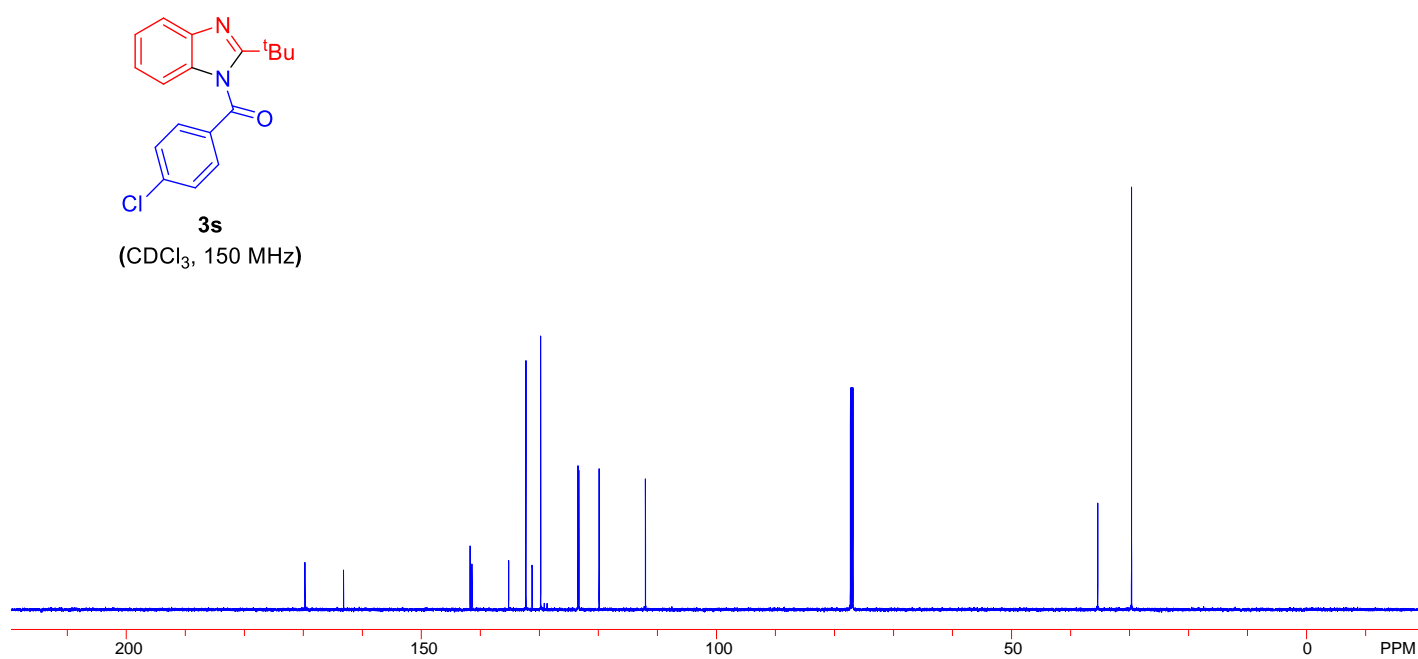

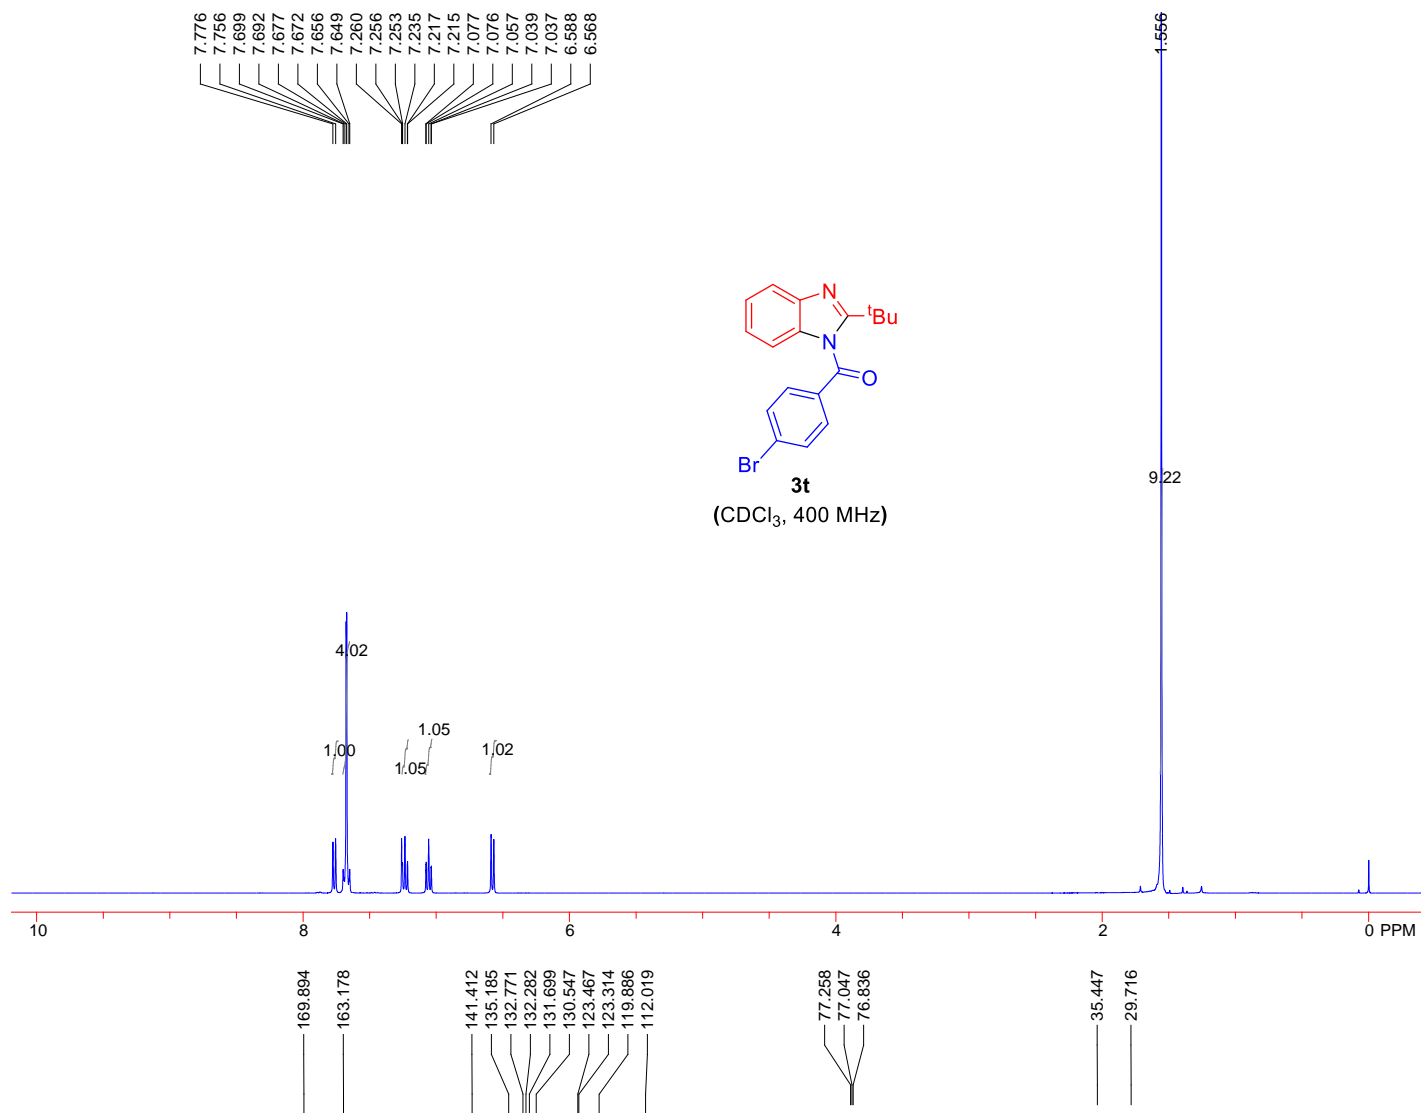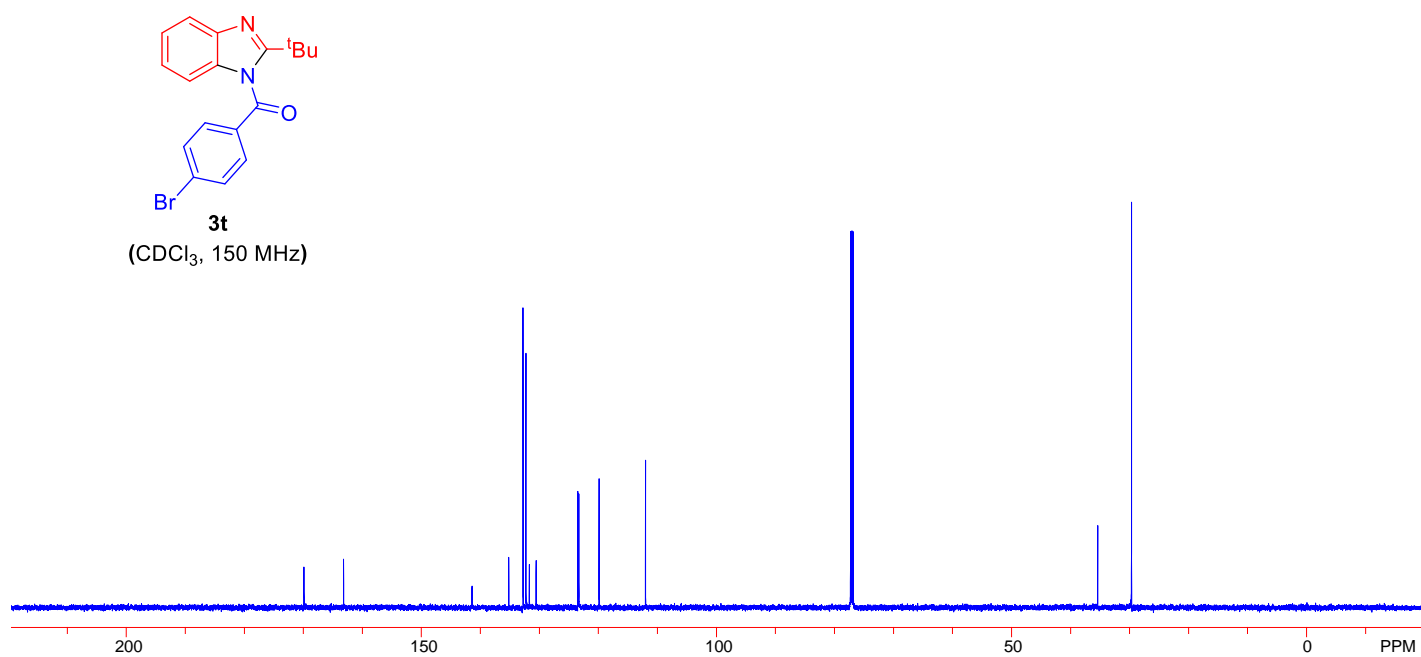

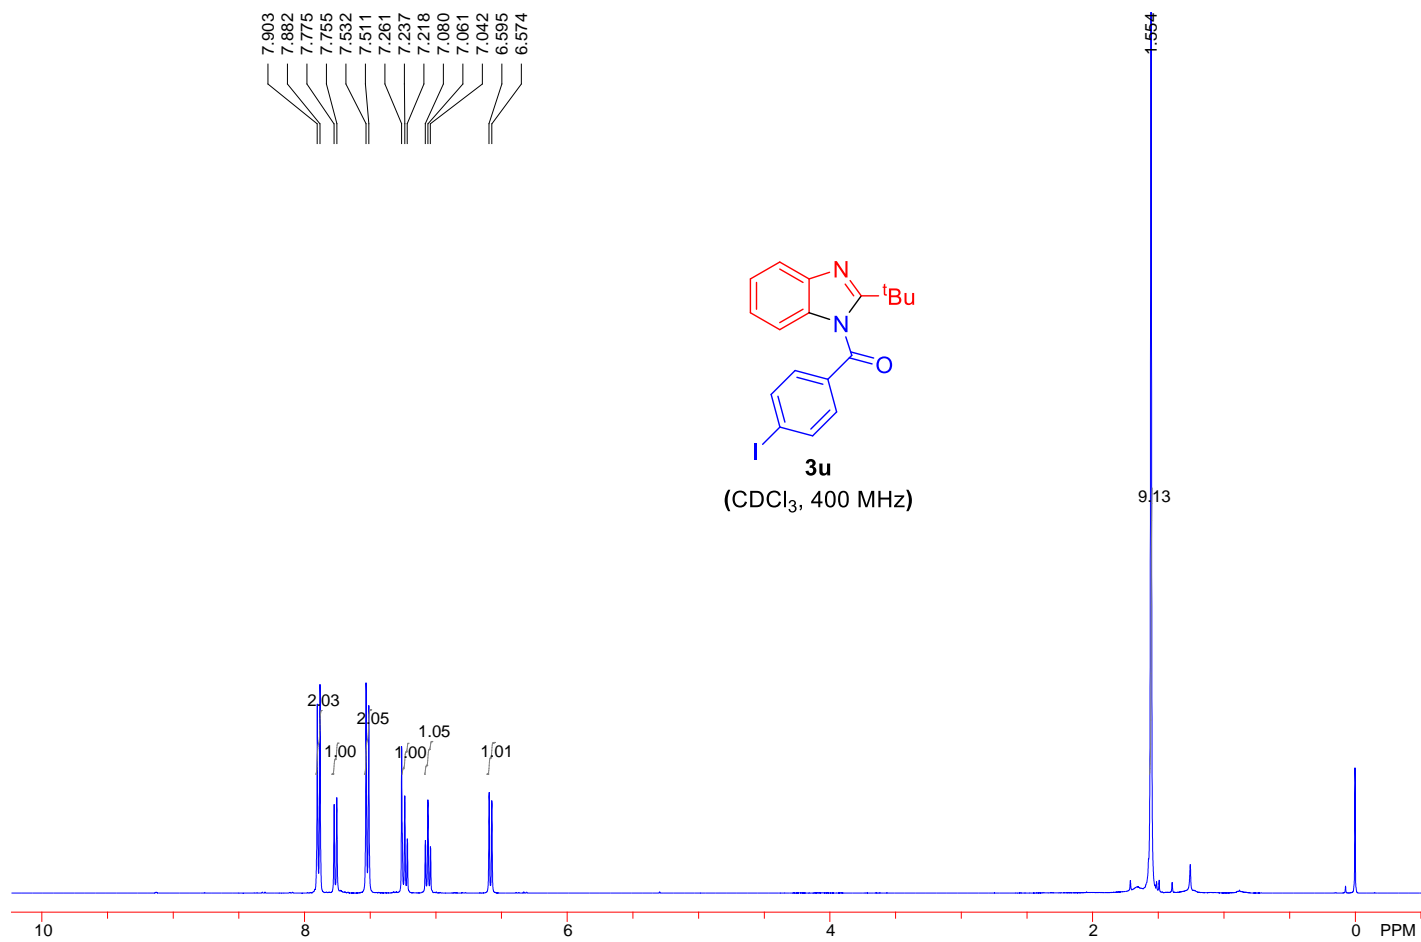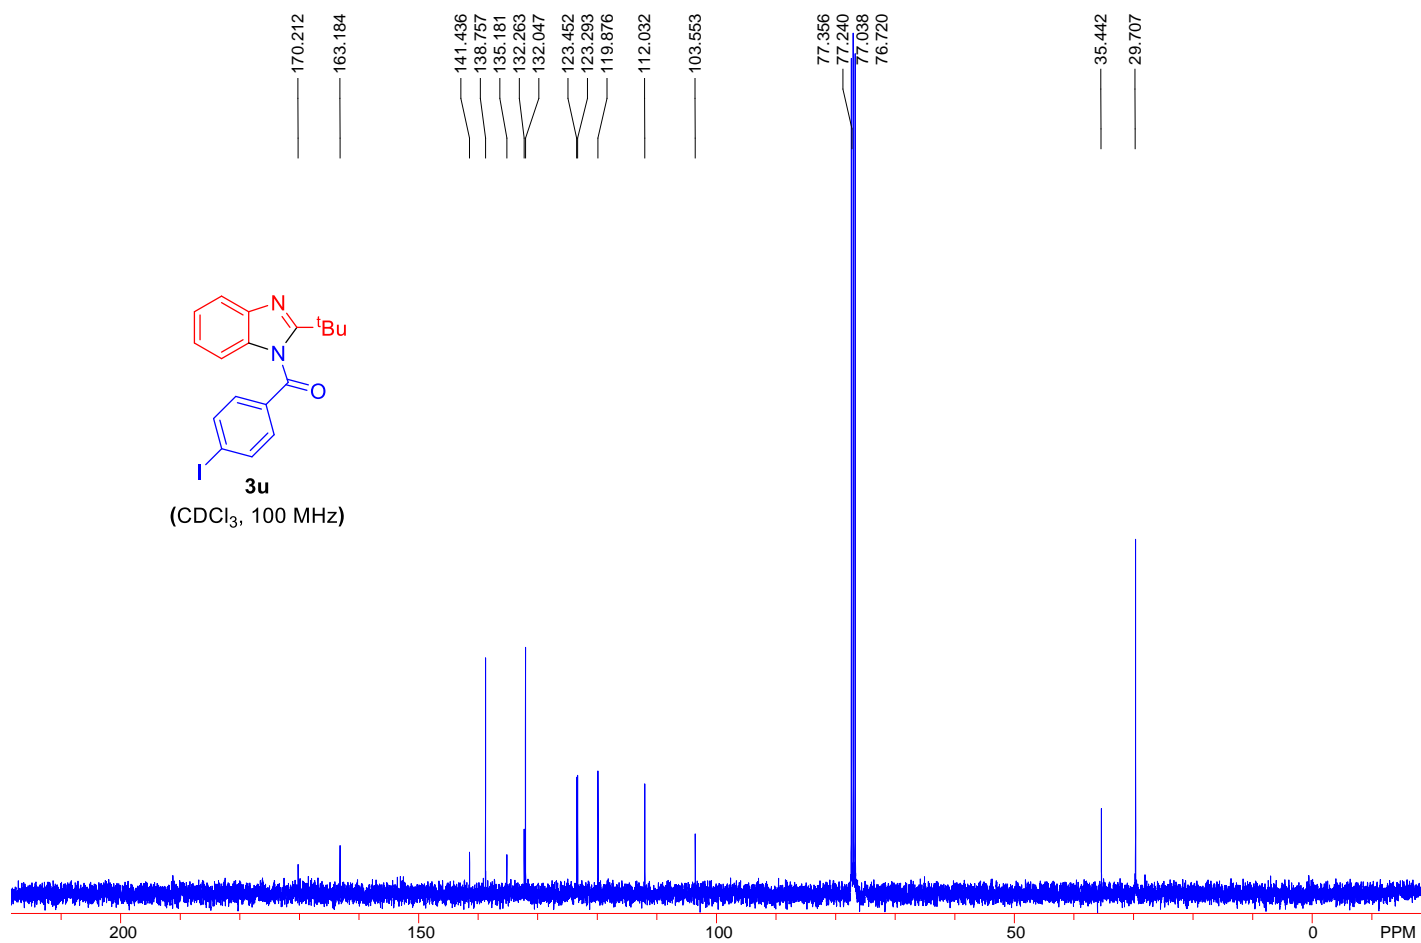

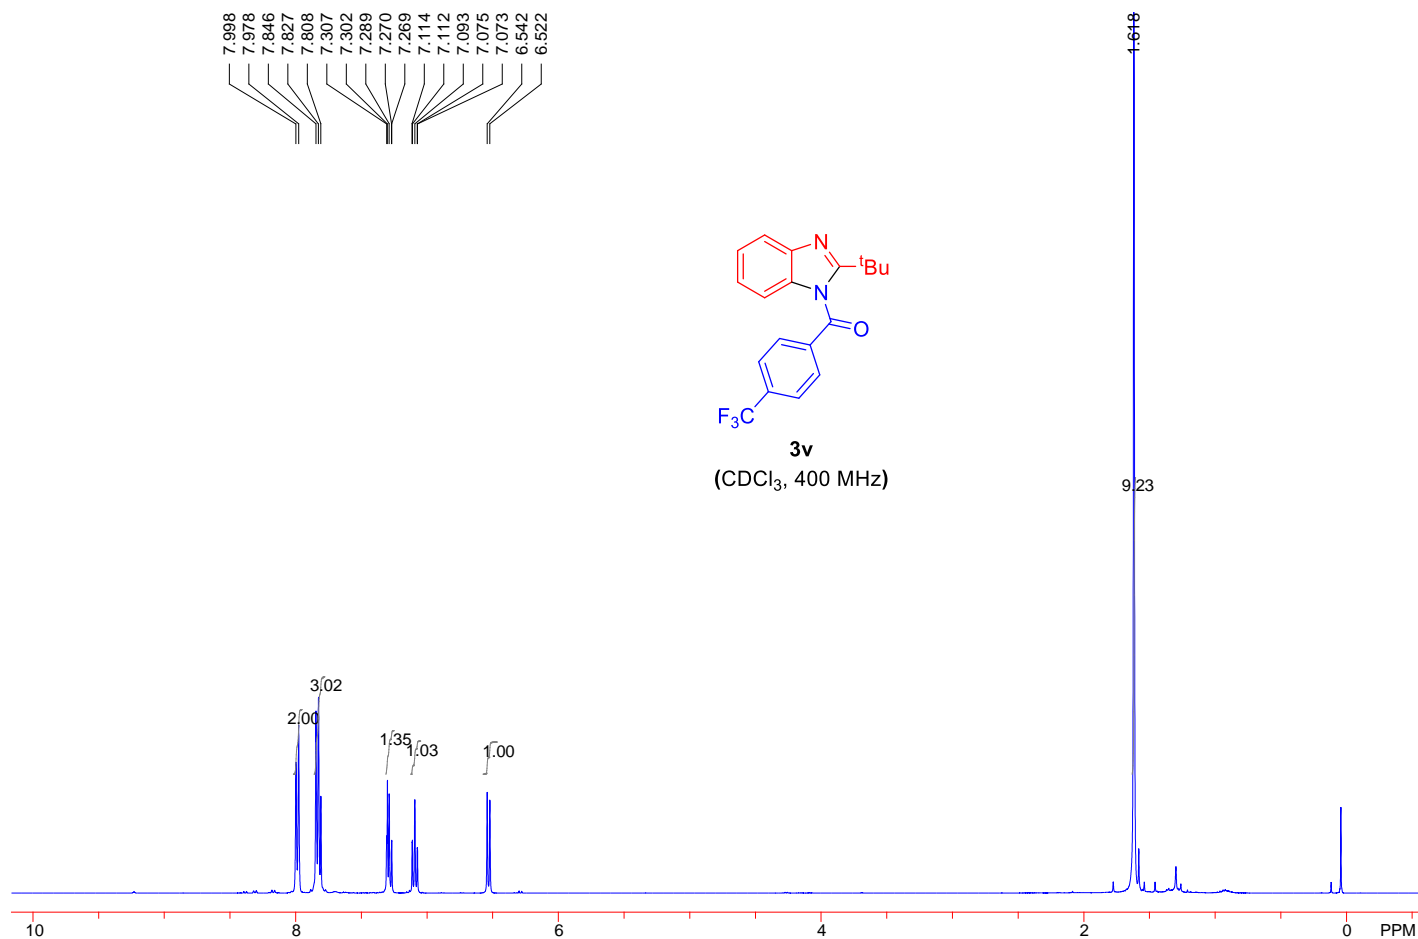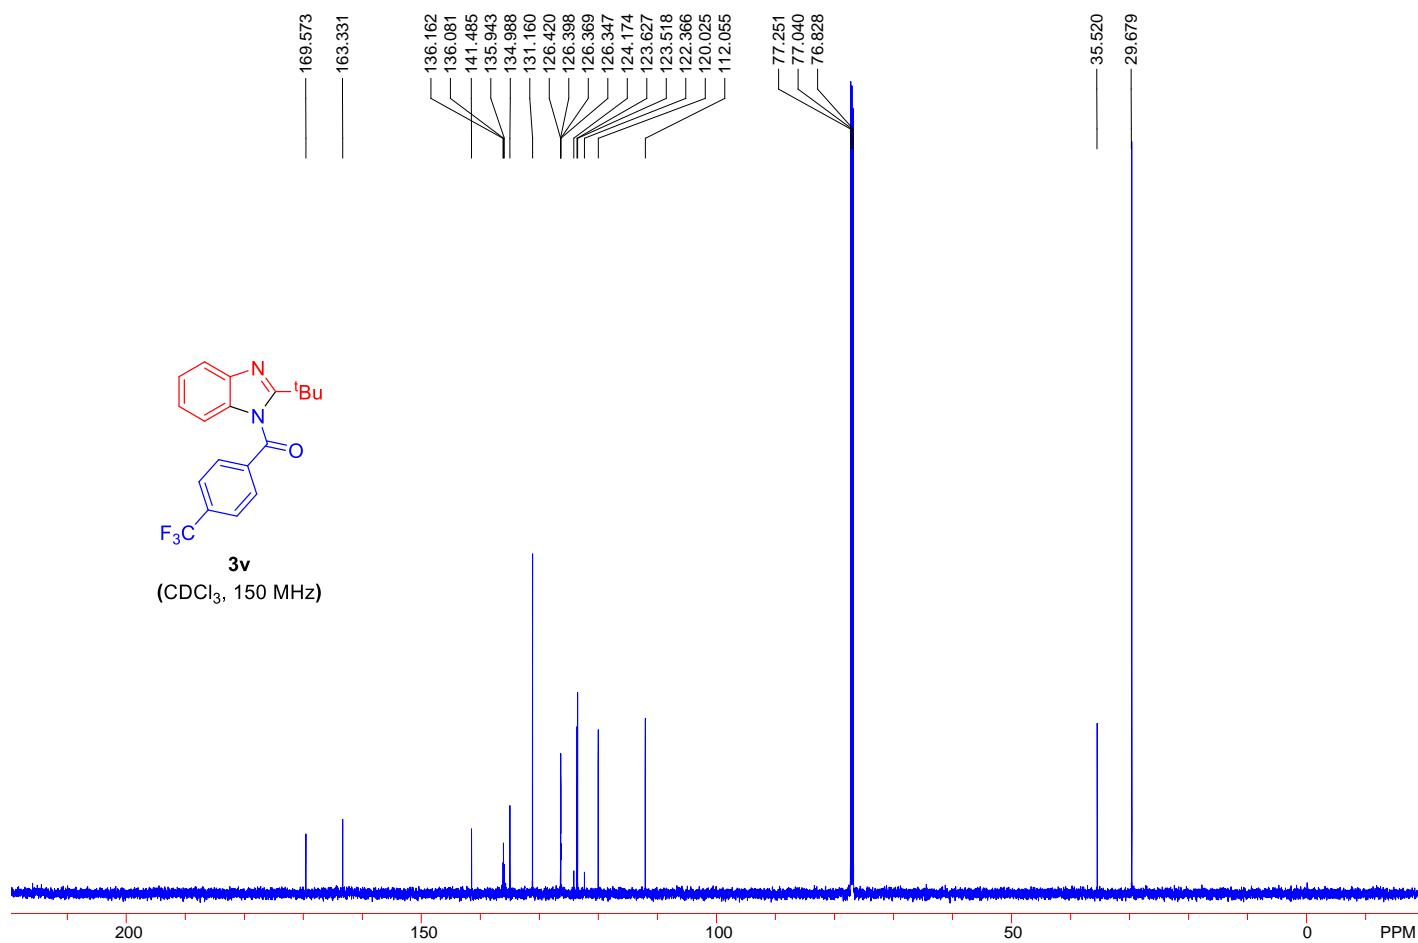



63.272

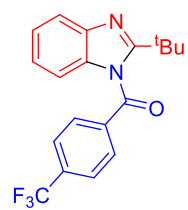

**3v**  
(CDCl<sub>3</sub>, 565 MHz)

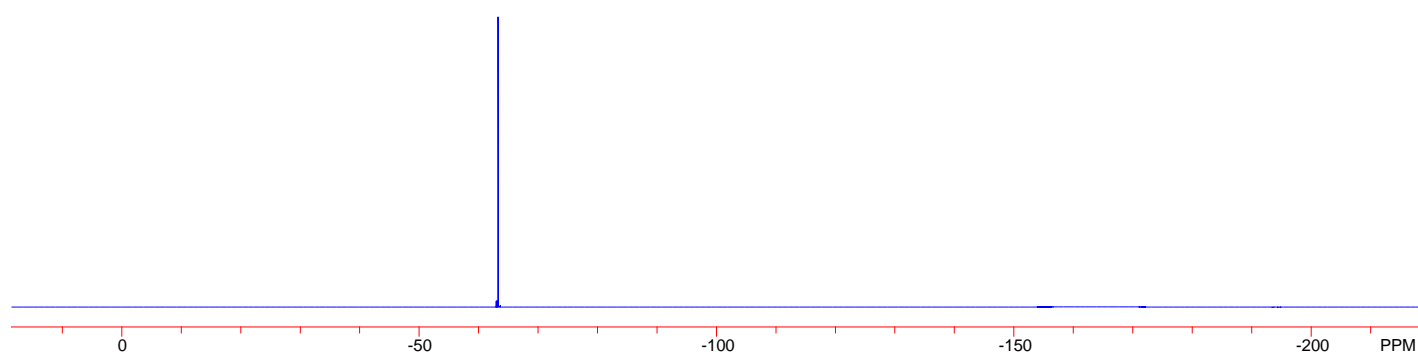

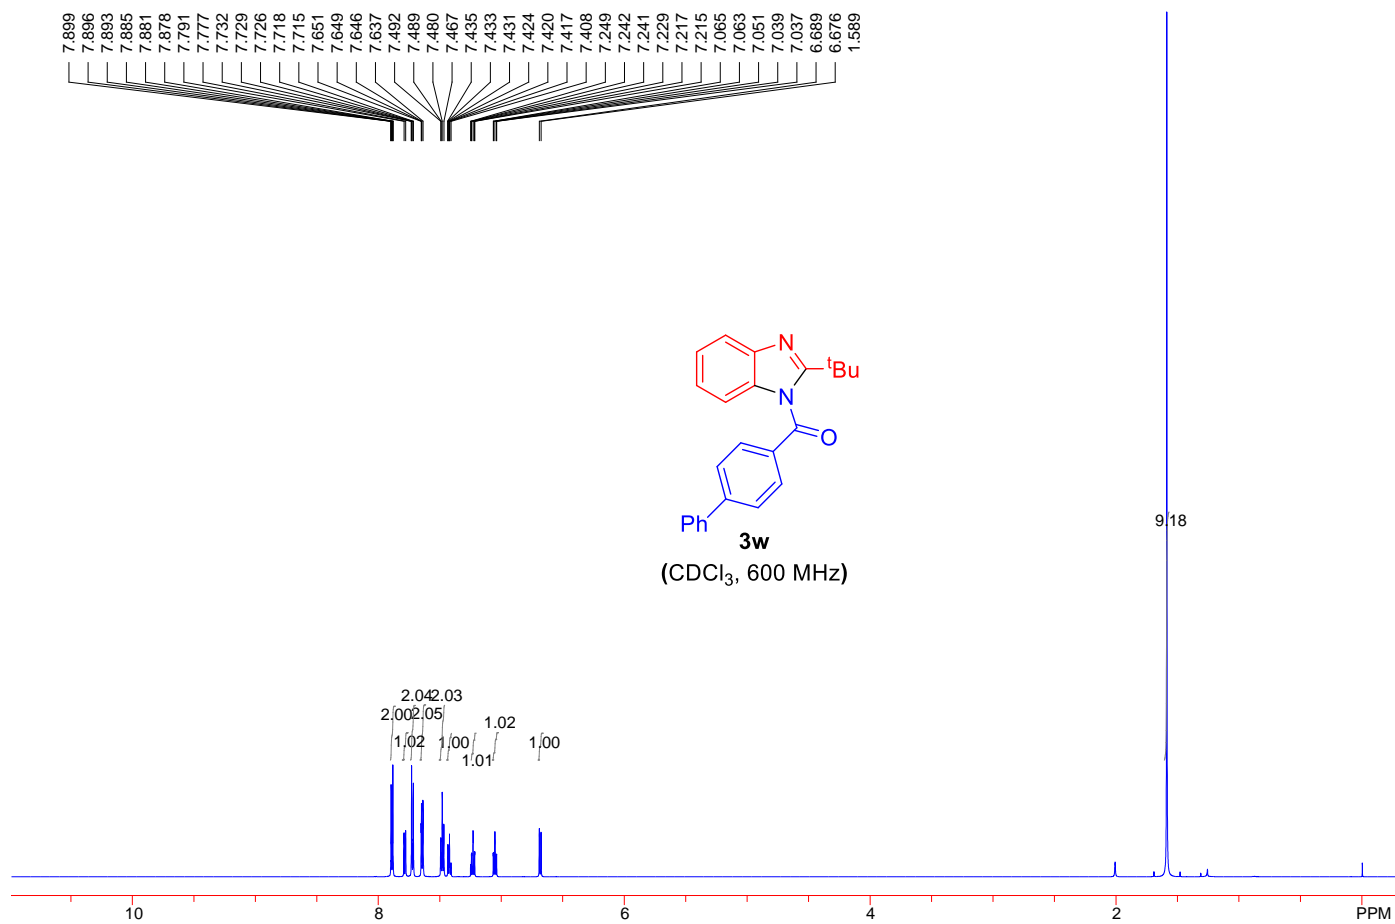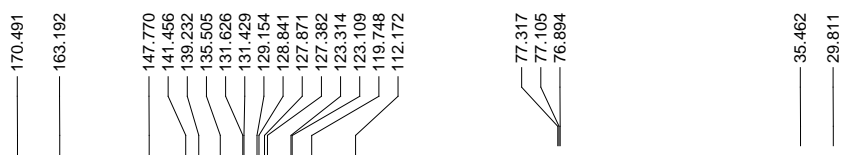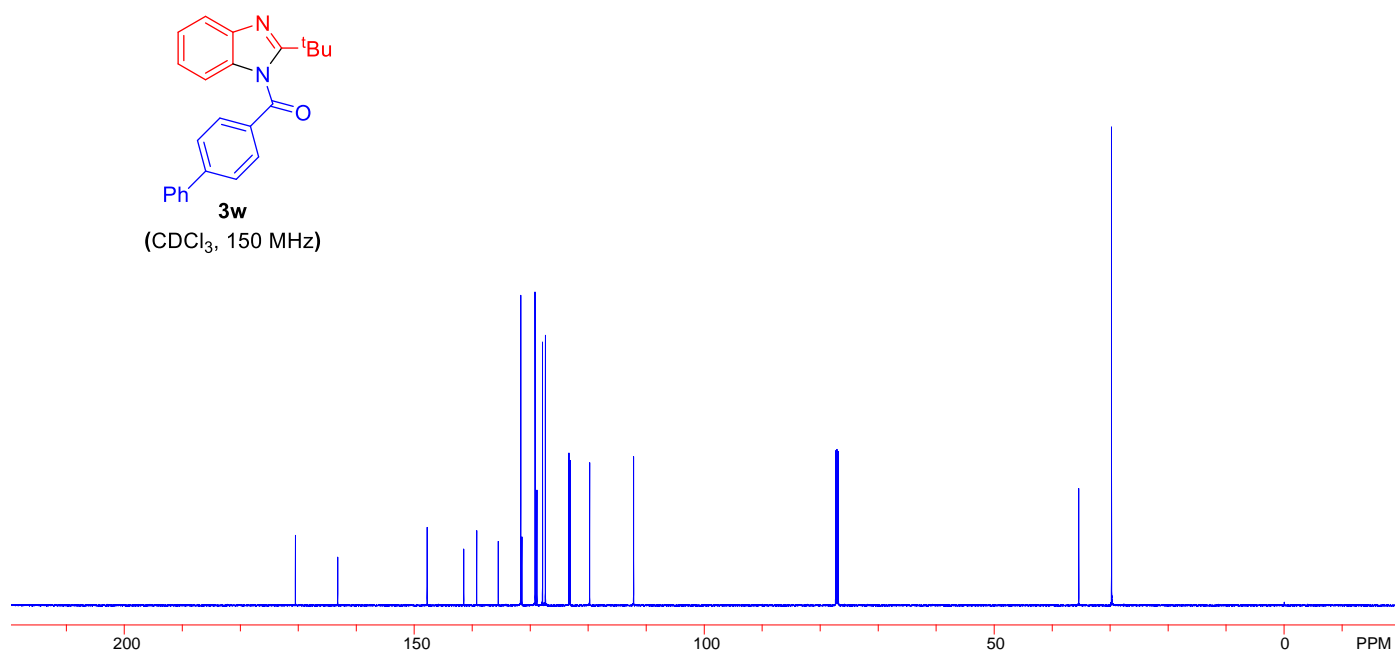

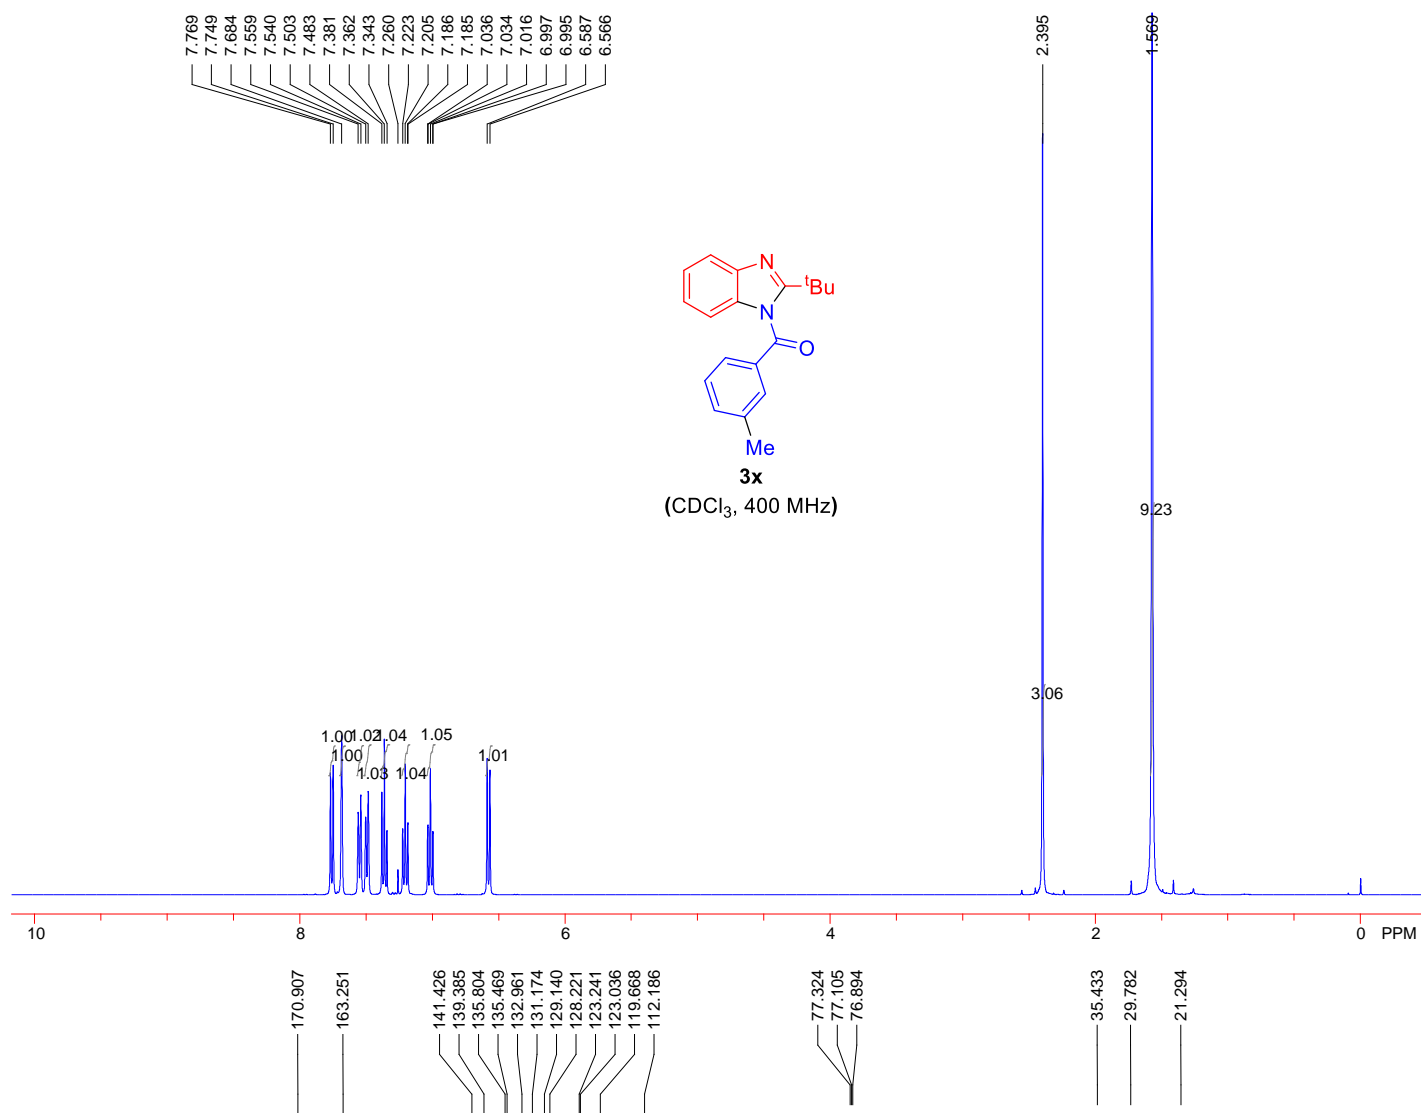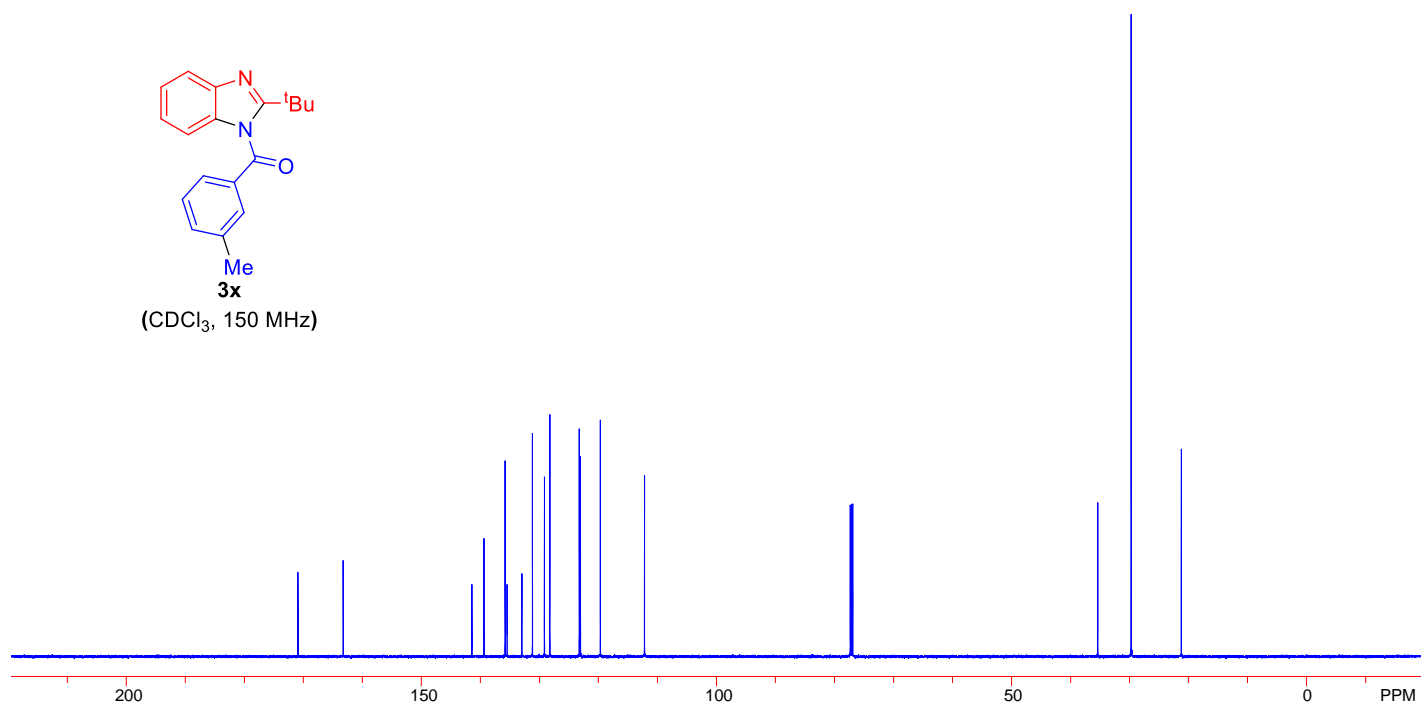

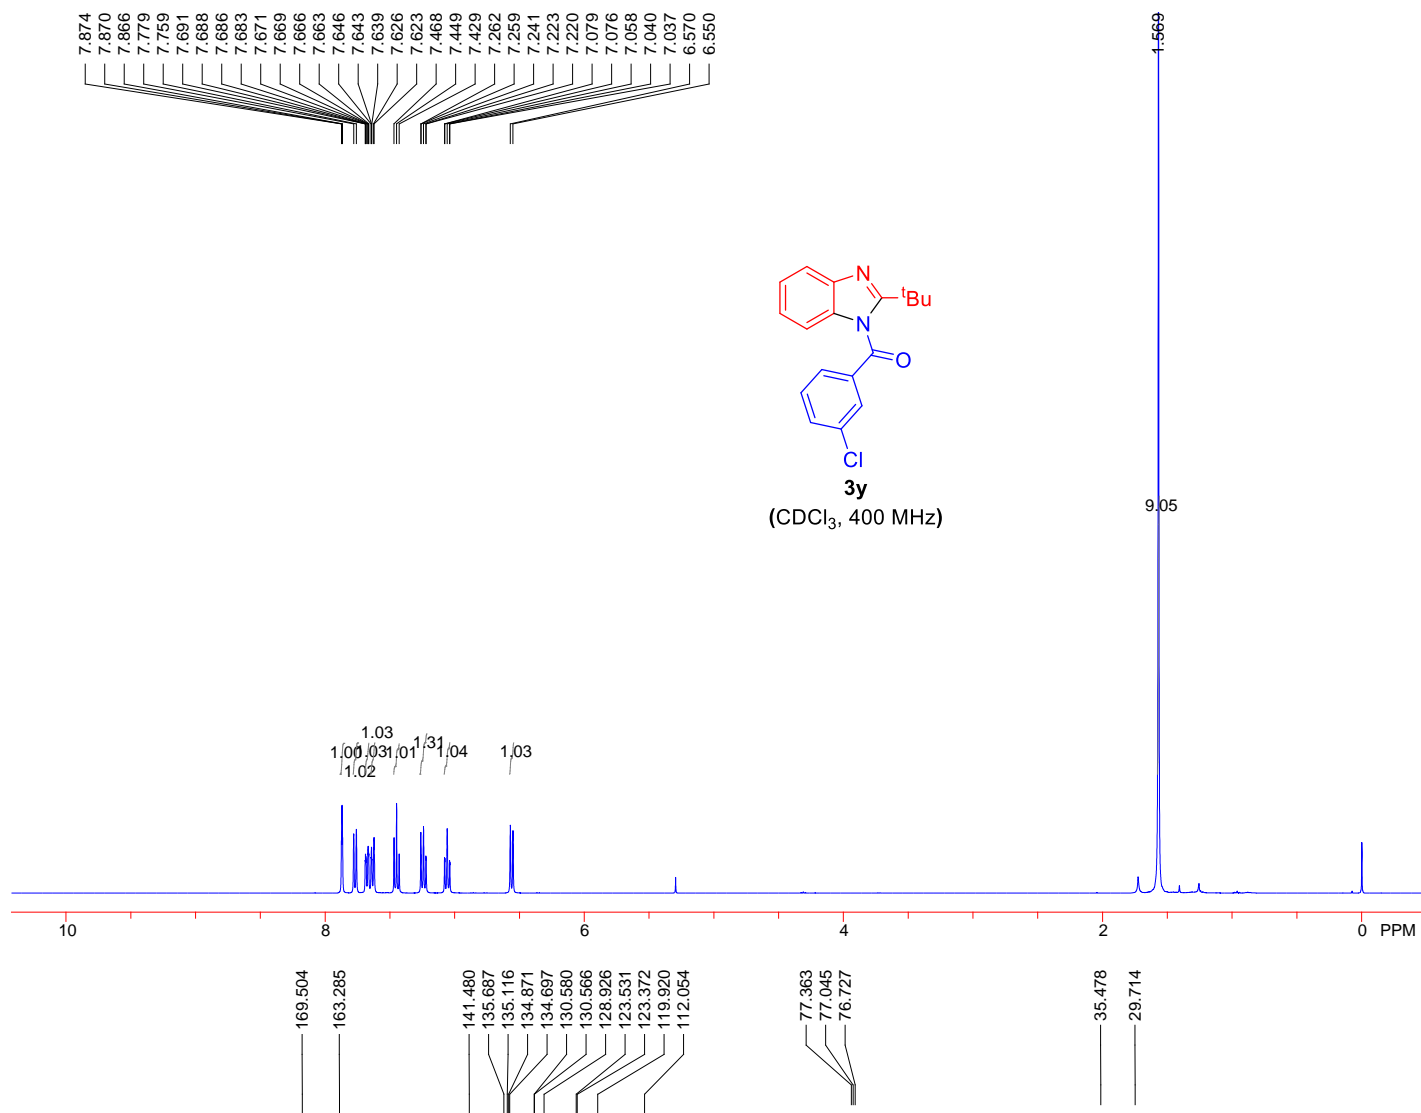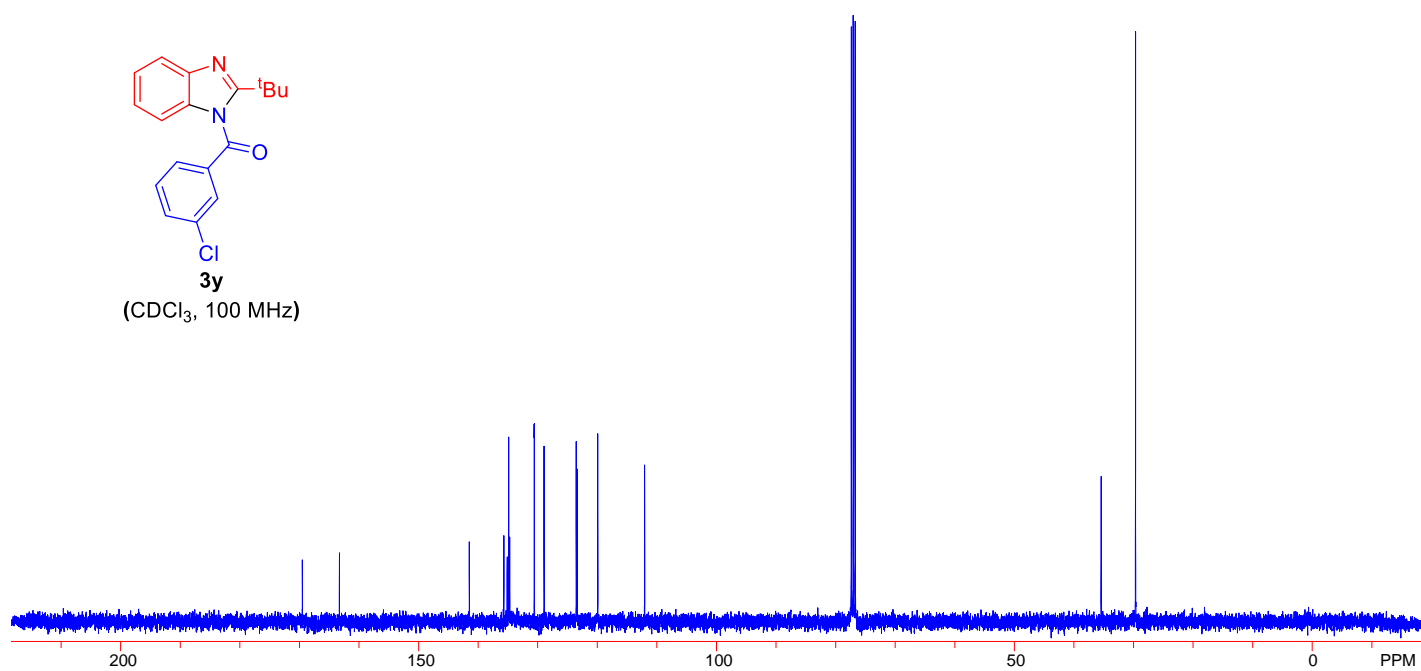

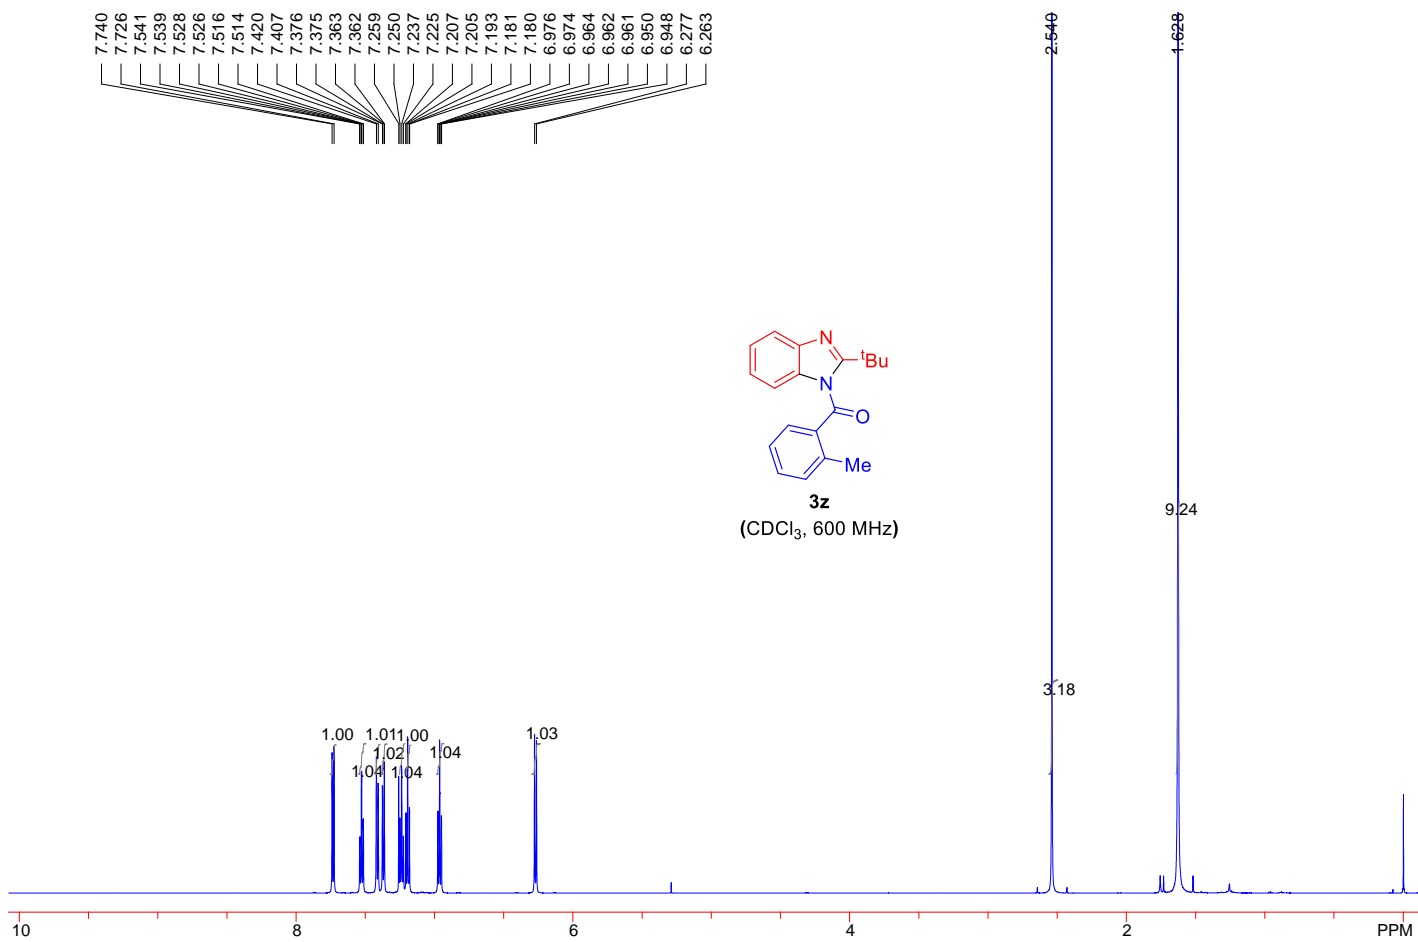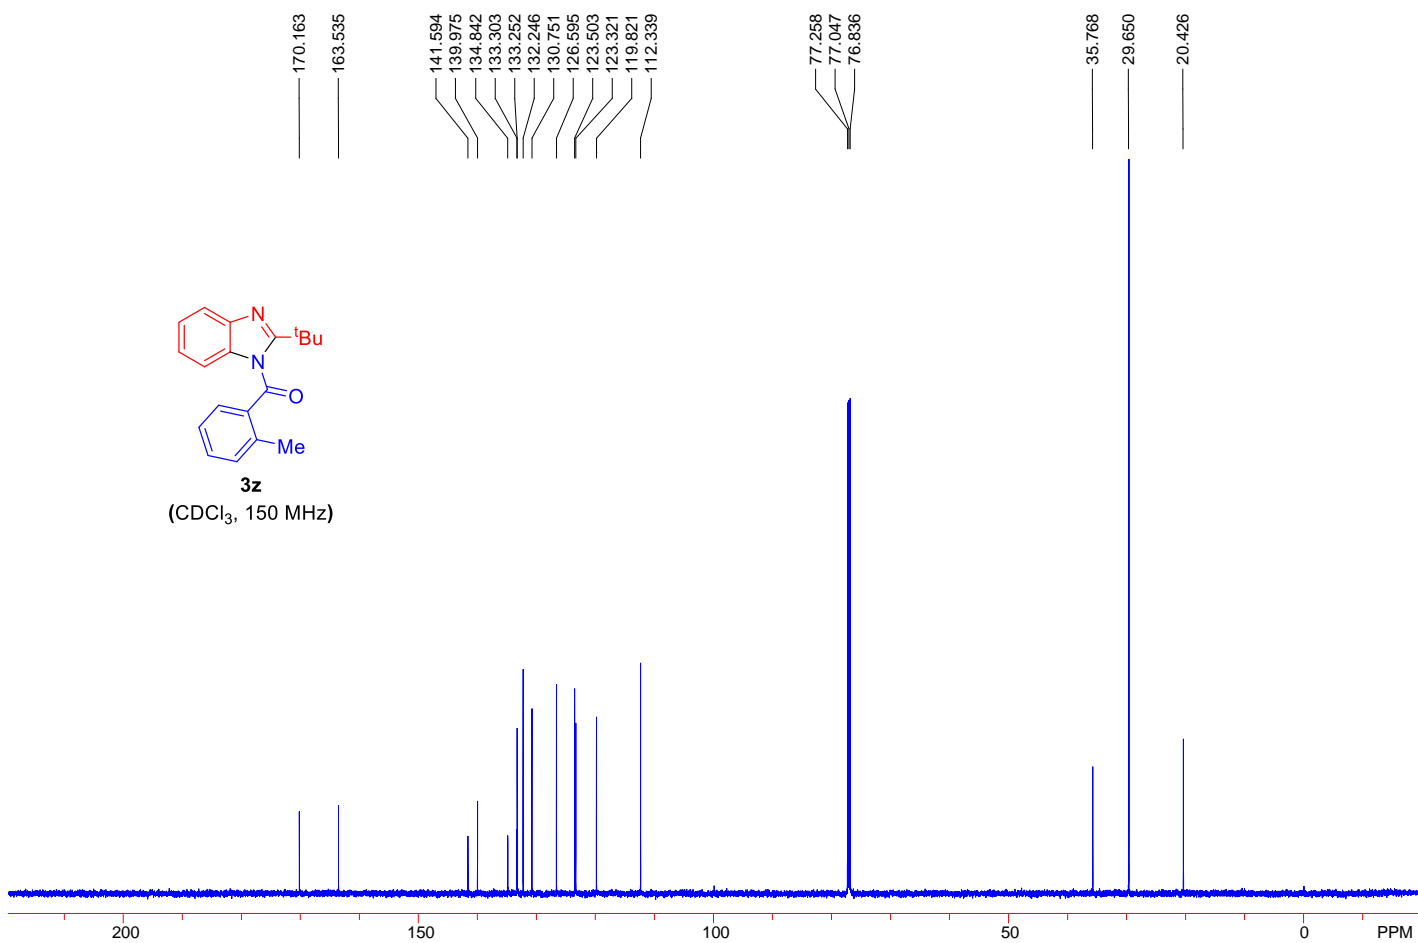

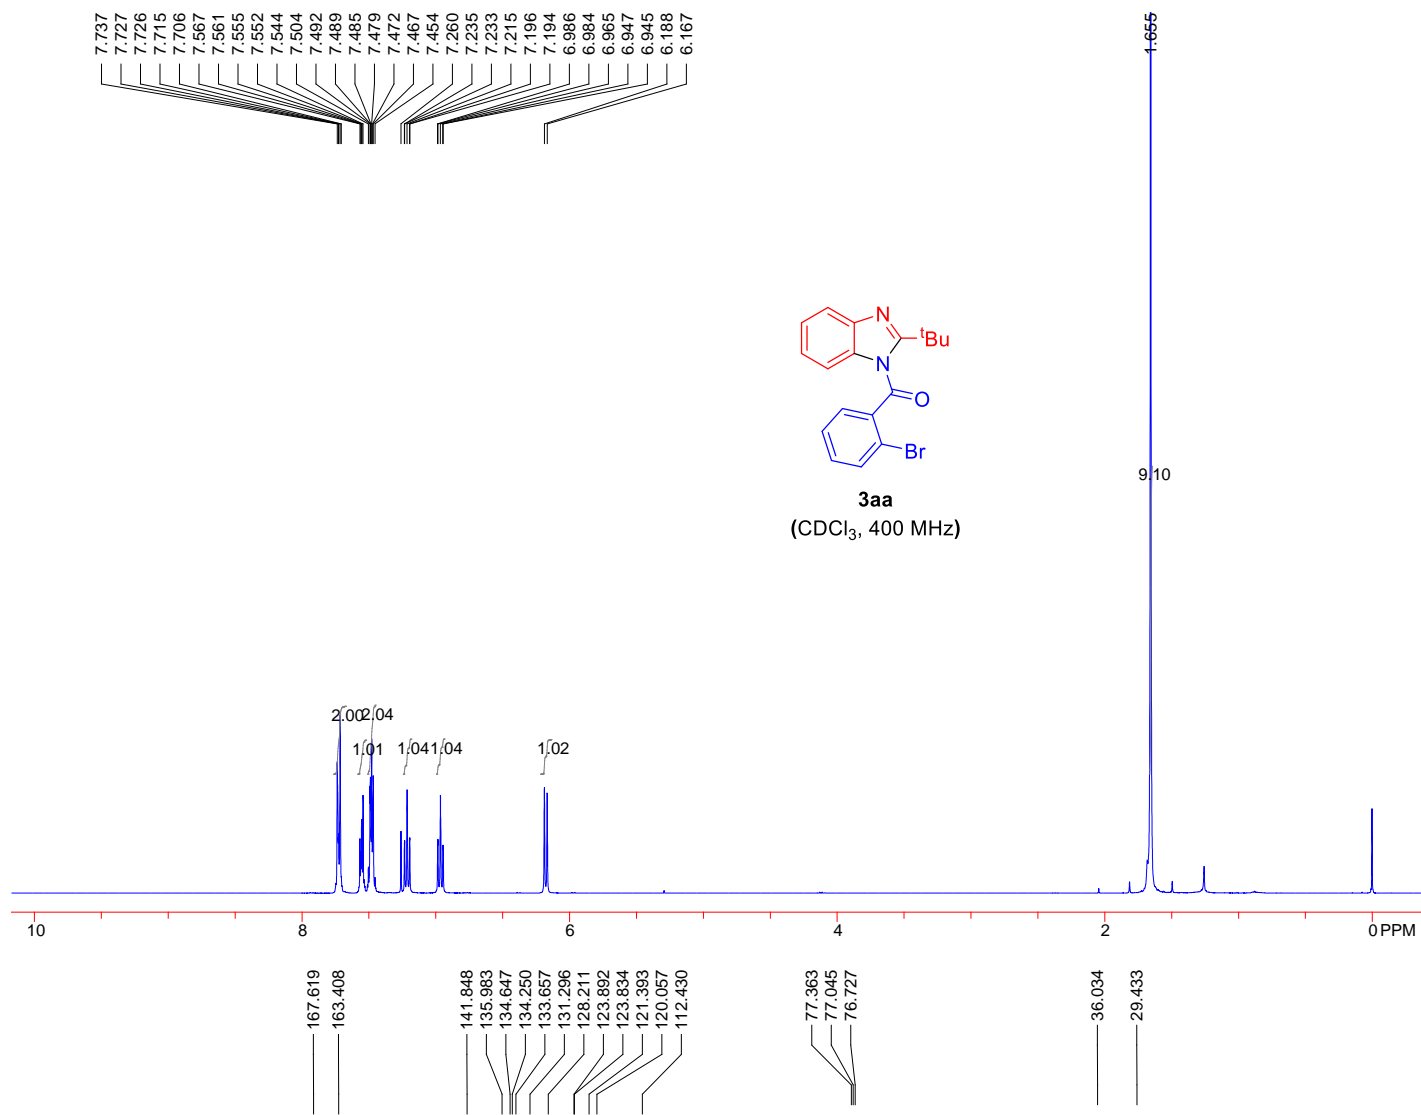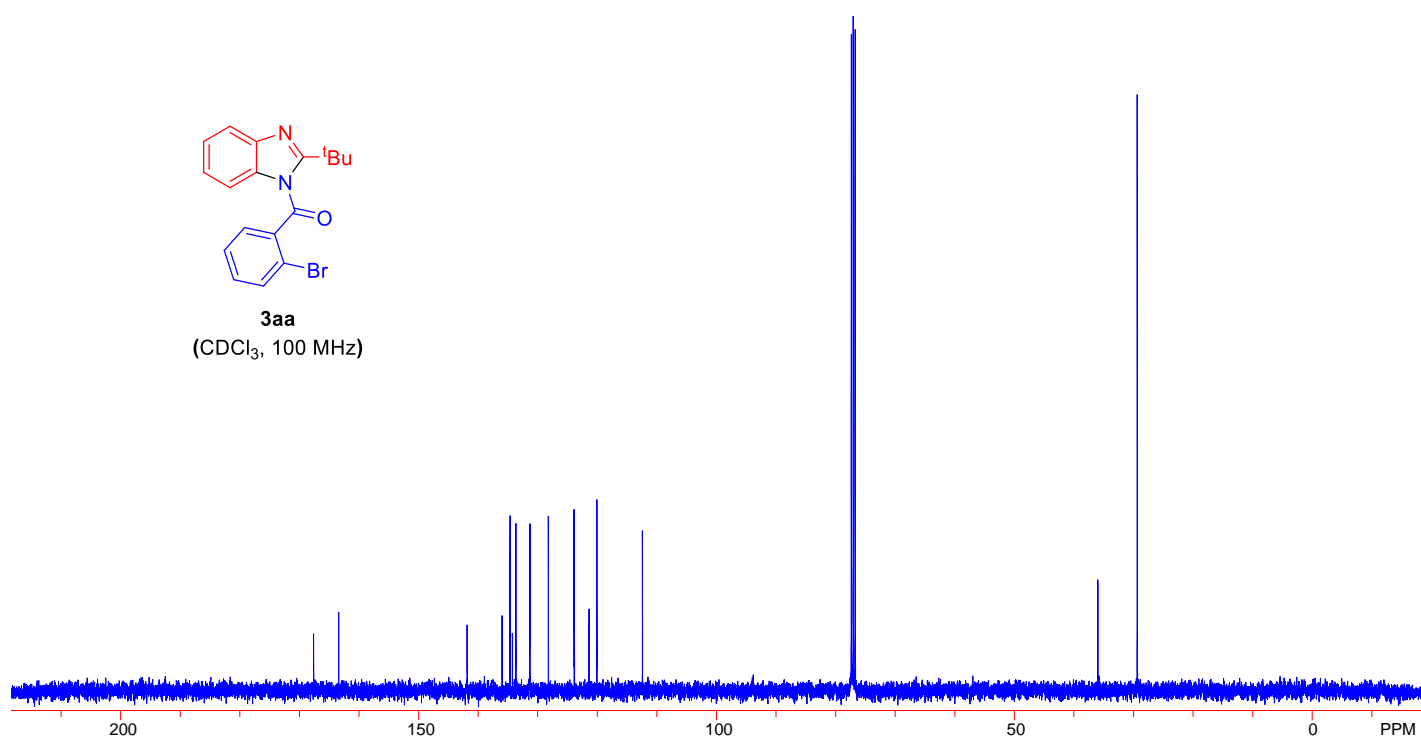

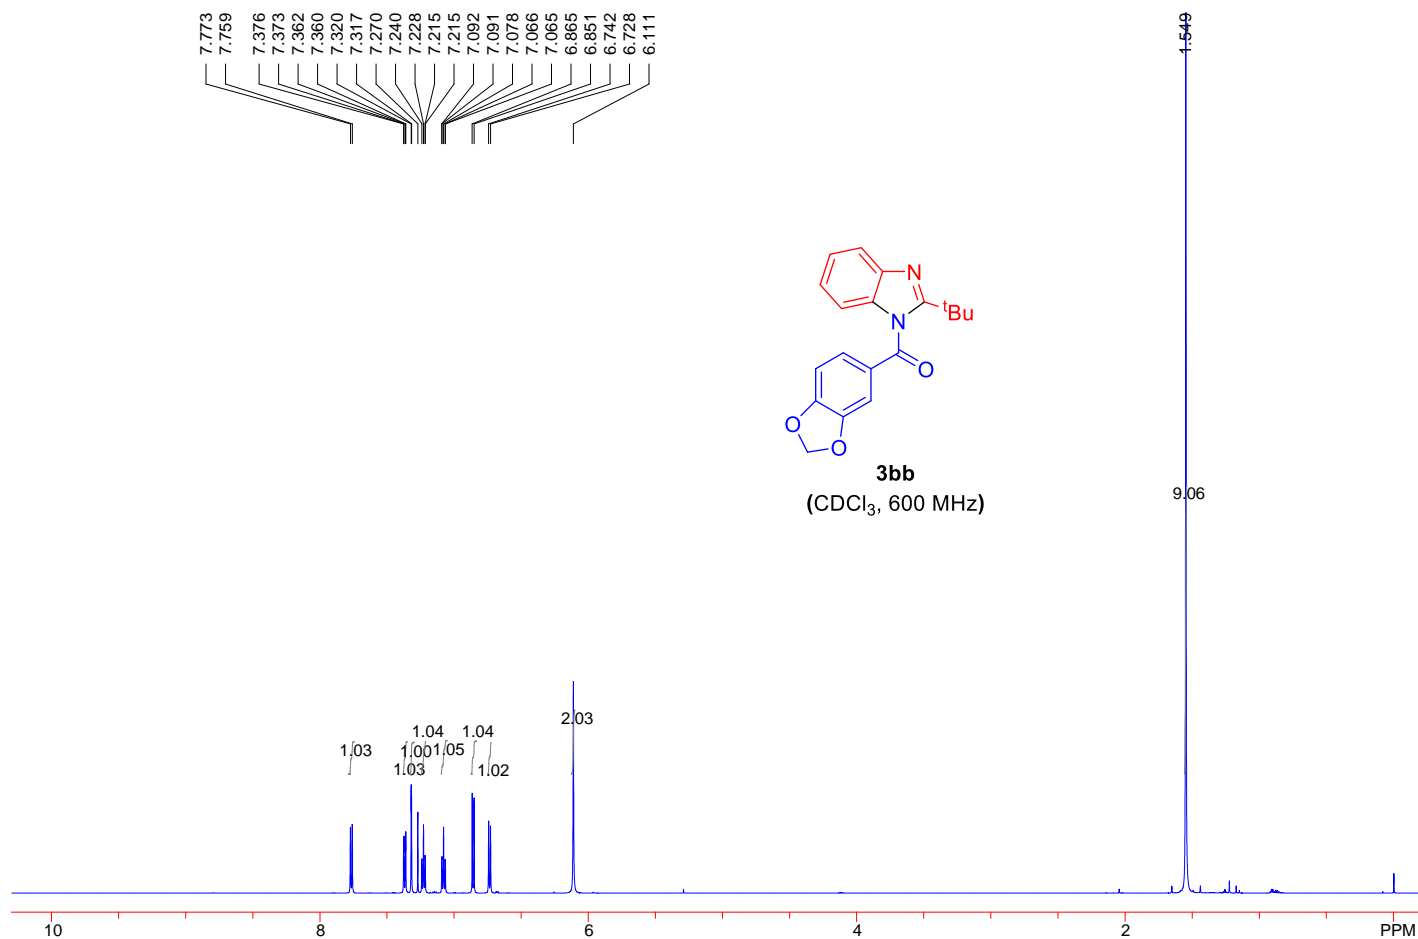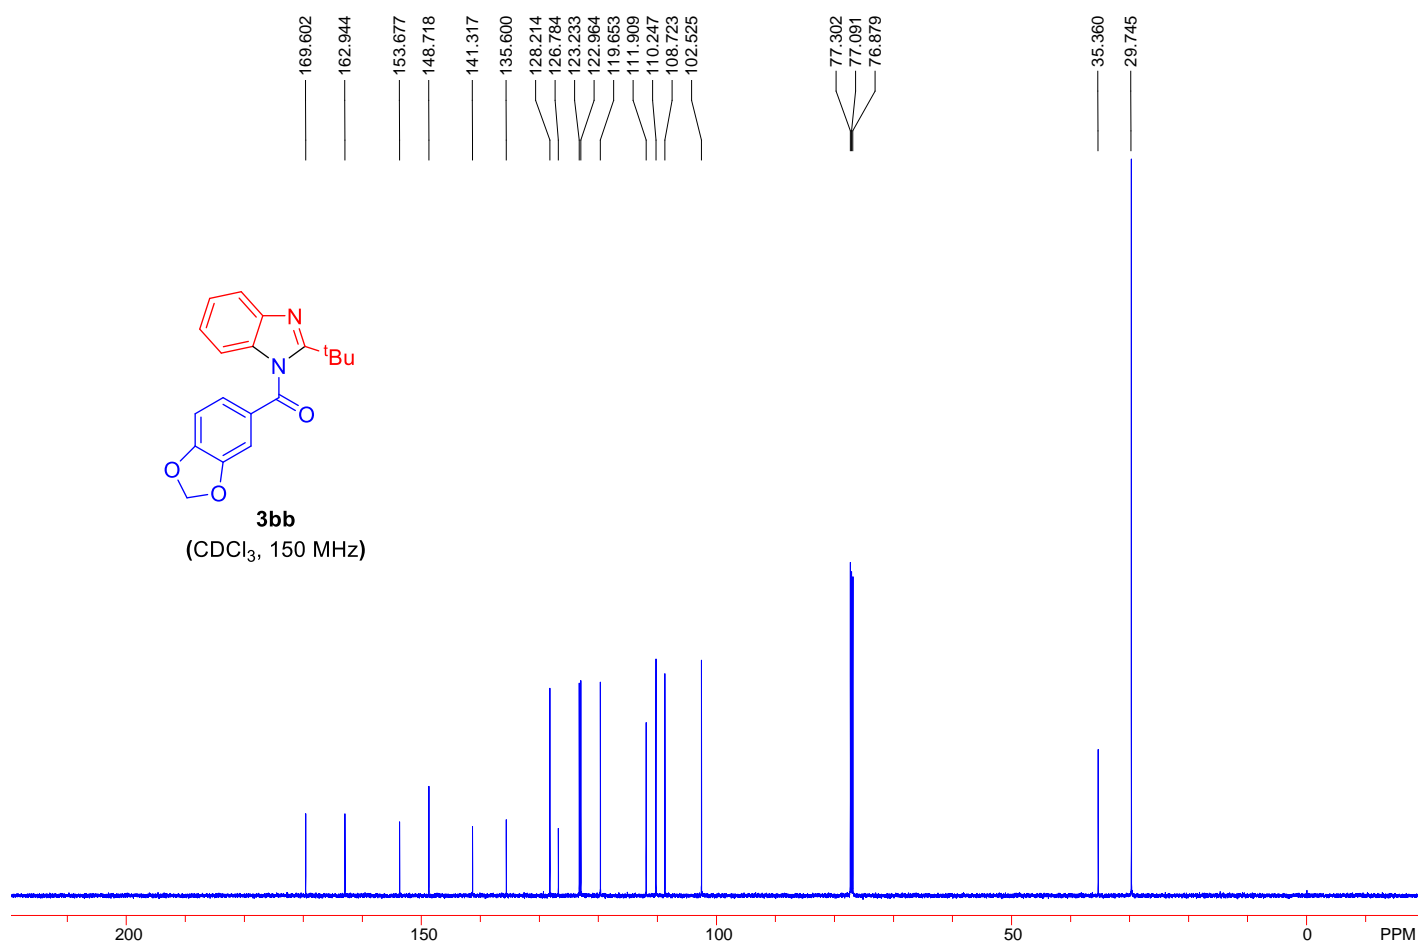

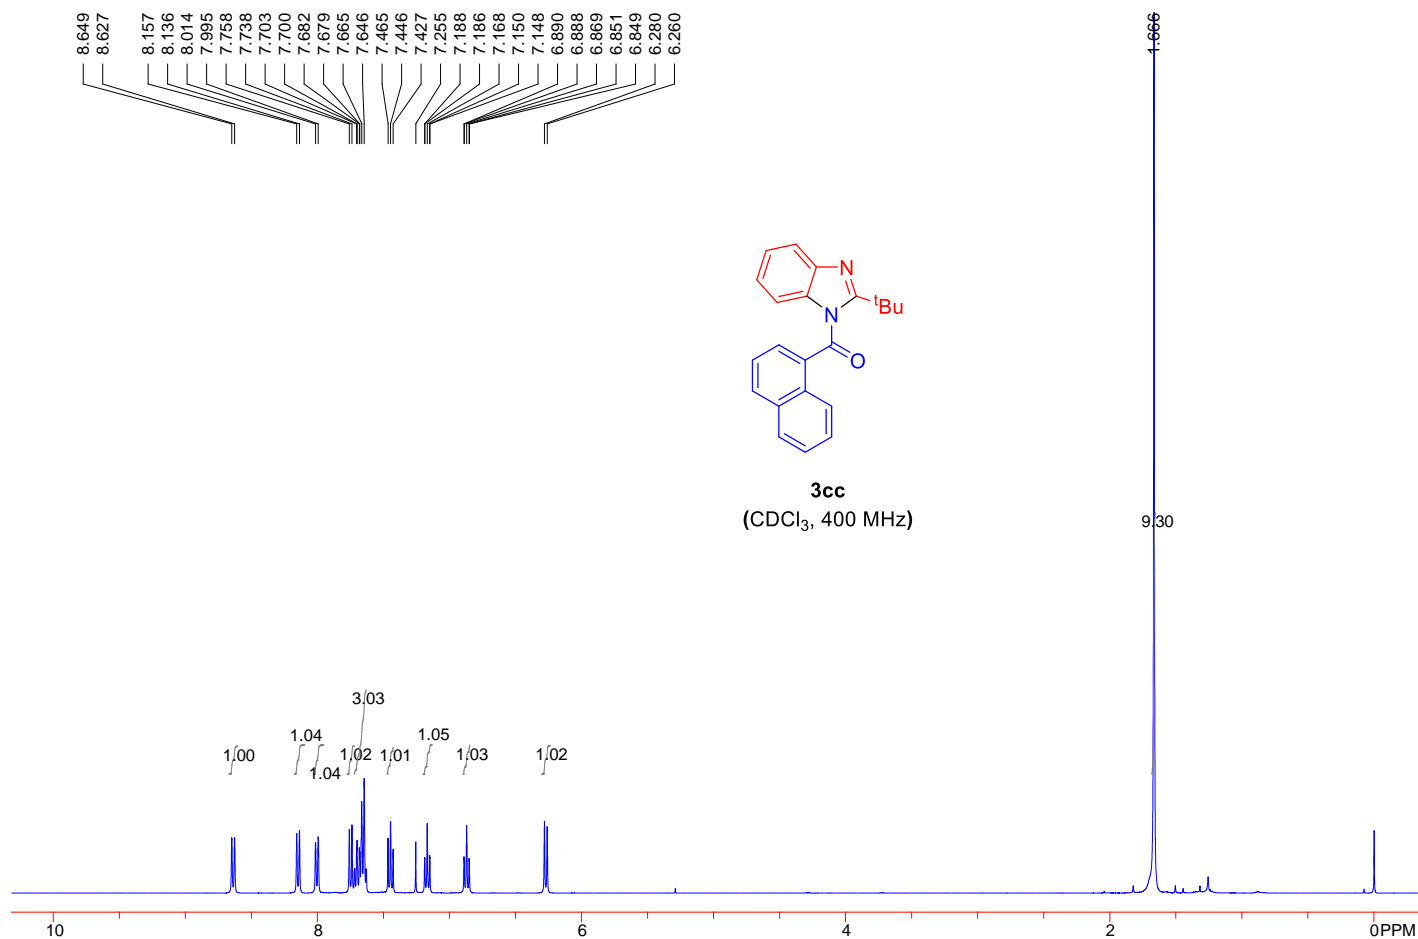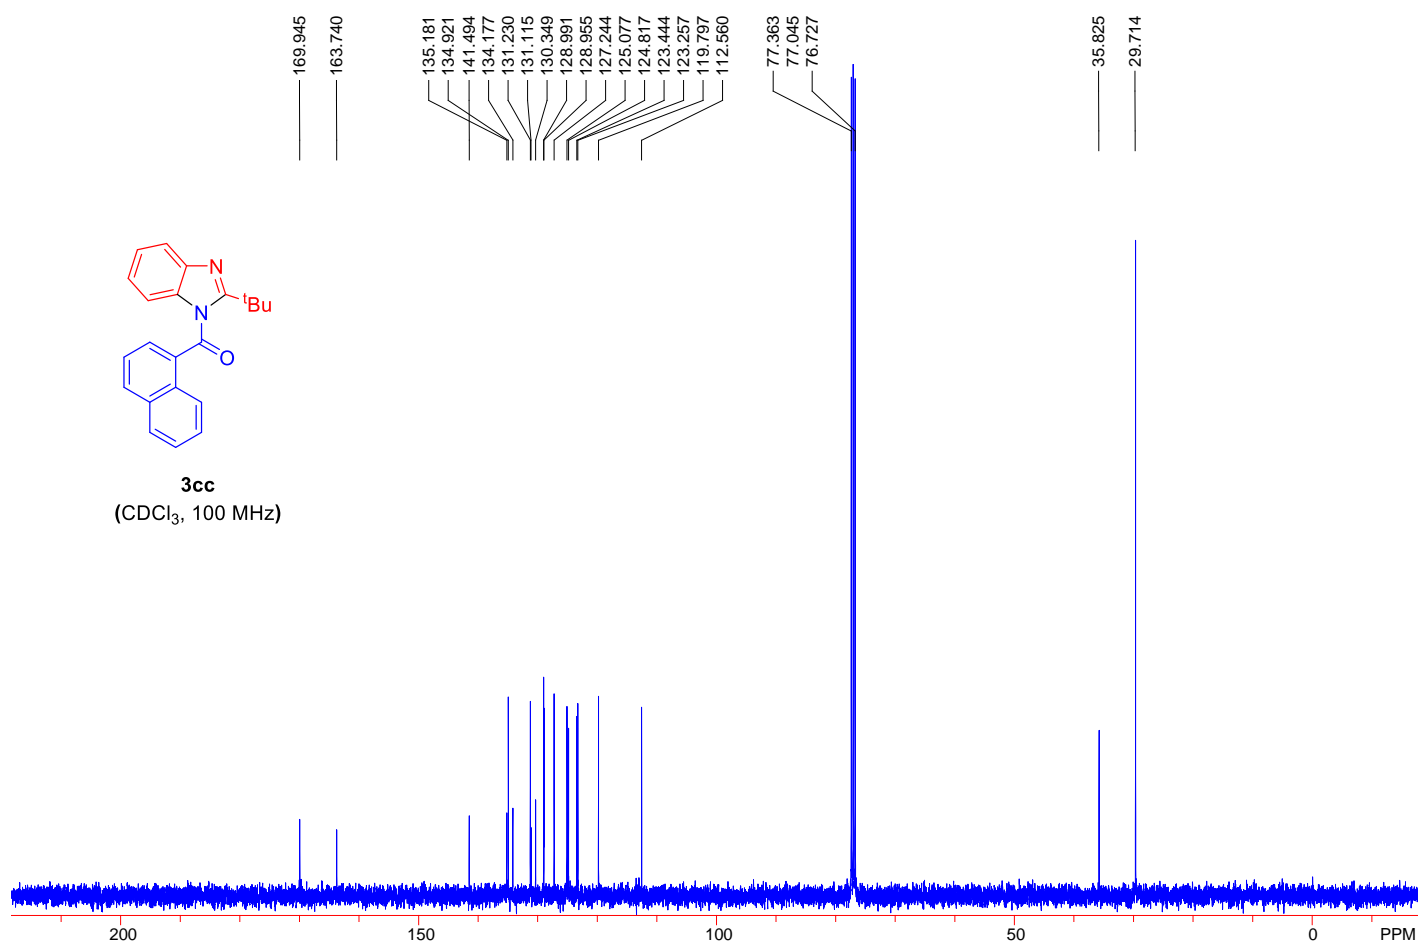



7.862  
7.860  
7.854  
7.852  
7.773  
7.759  
7.538  
7.536  
7.532  
7.530  
7.268  
7.257  
7.255  
7.244  
7.243  
7.231  
7.229  
7.152  
7.145  
7.144  
7.137  
7.130  
7.128  
7.116  
7.114  
7.104  
7.102  
6.939  
6.925

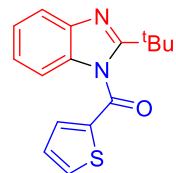

**3dd**  
(CDCl<sub>3</sub>, 600 MHz)

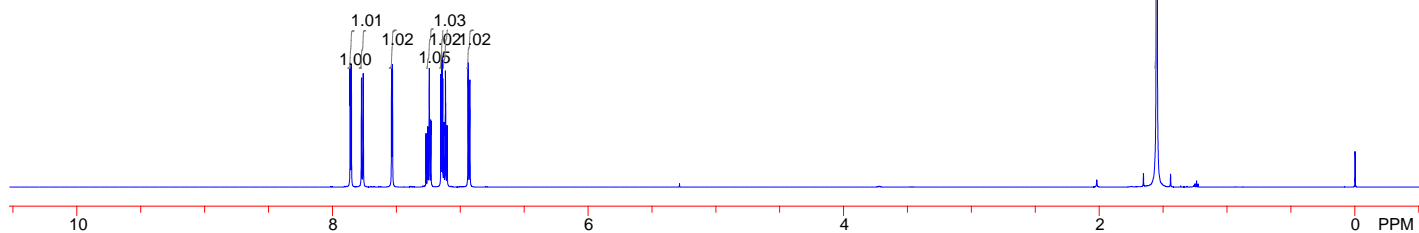

164.242  
162.427  
141.375  
137.700  
137.387  
137.051  
135.834  
128.863  
123.270  
123.066  
119.675  
111.603

77.295  
77.083  
76.872

35.389  
29.709

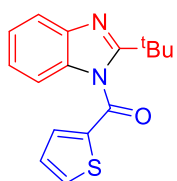

**3dd**  
(CDCl<sub>3</sub>, 150 MHz)

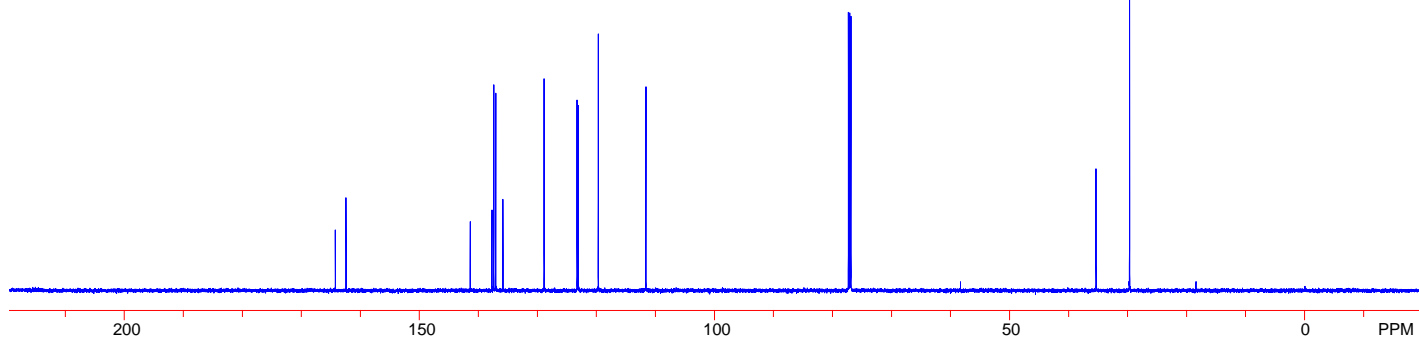

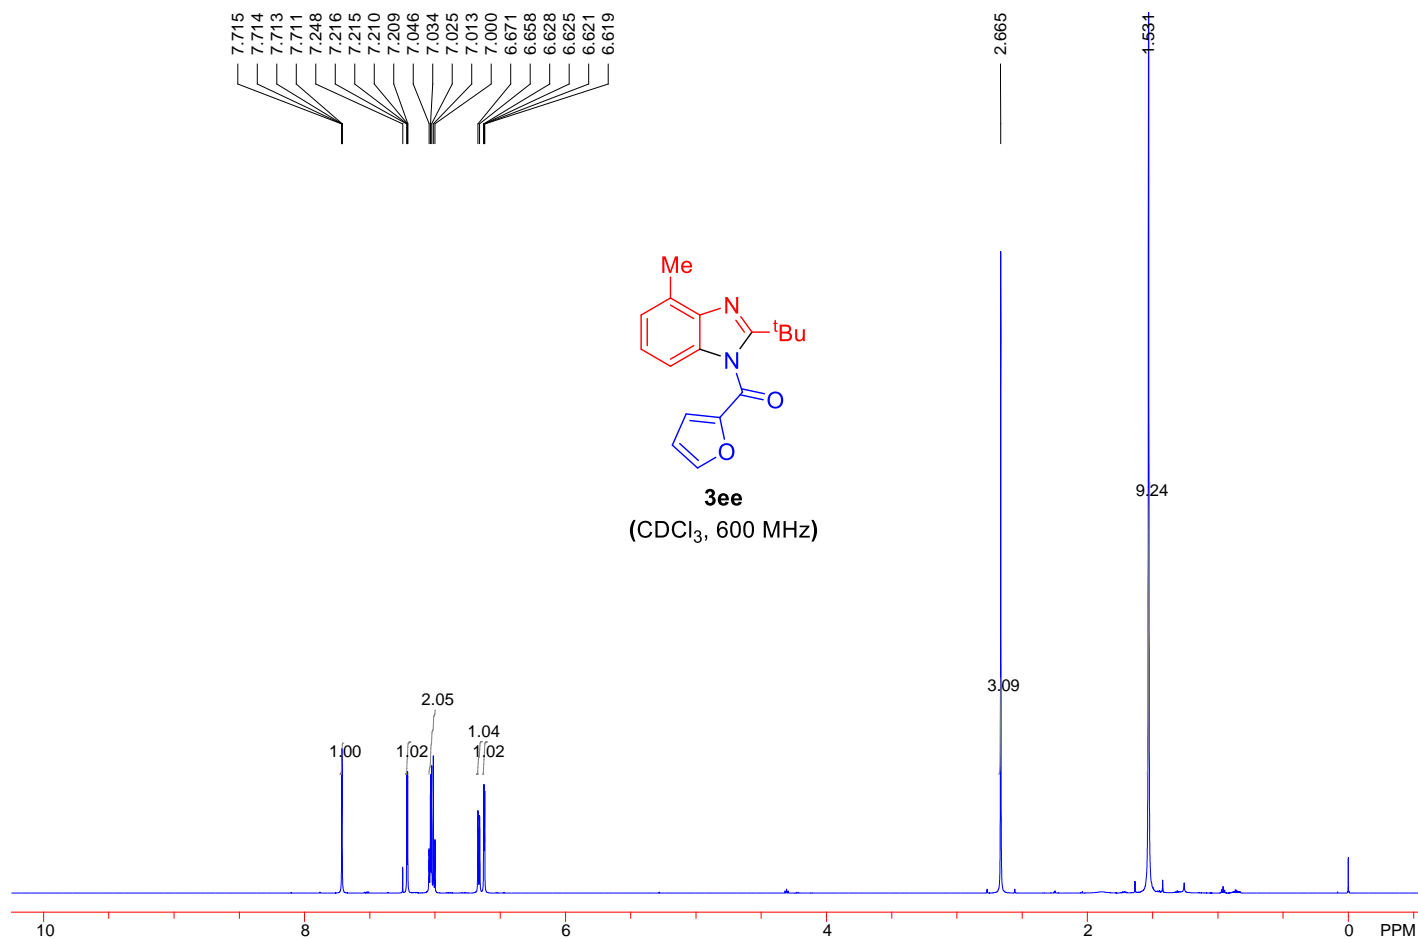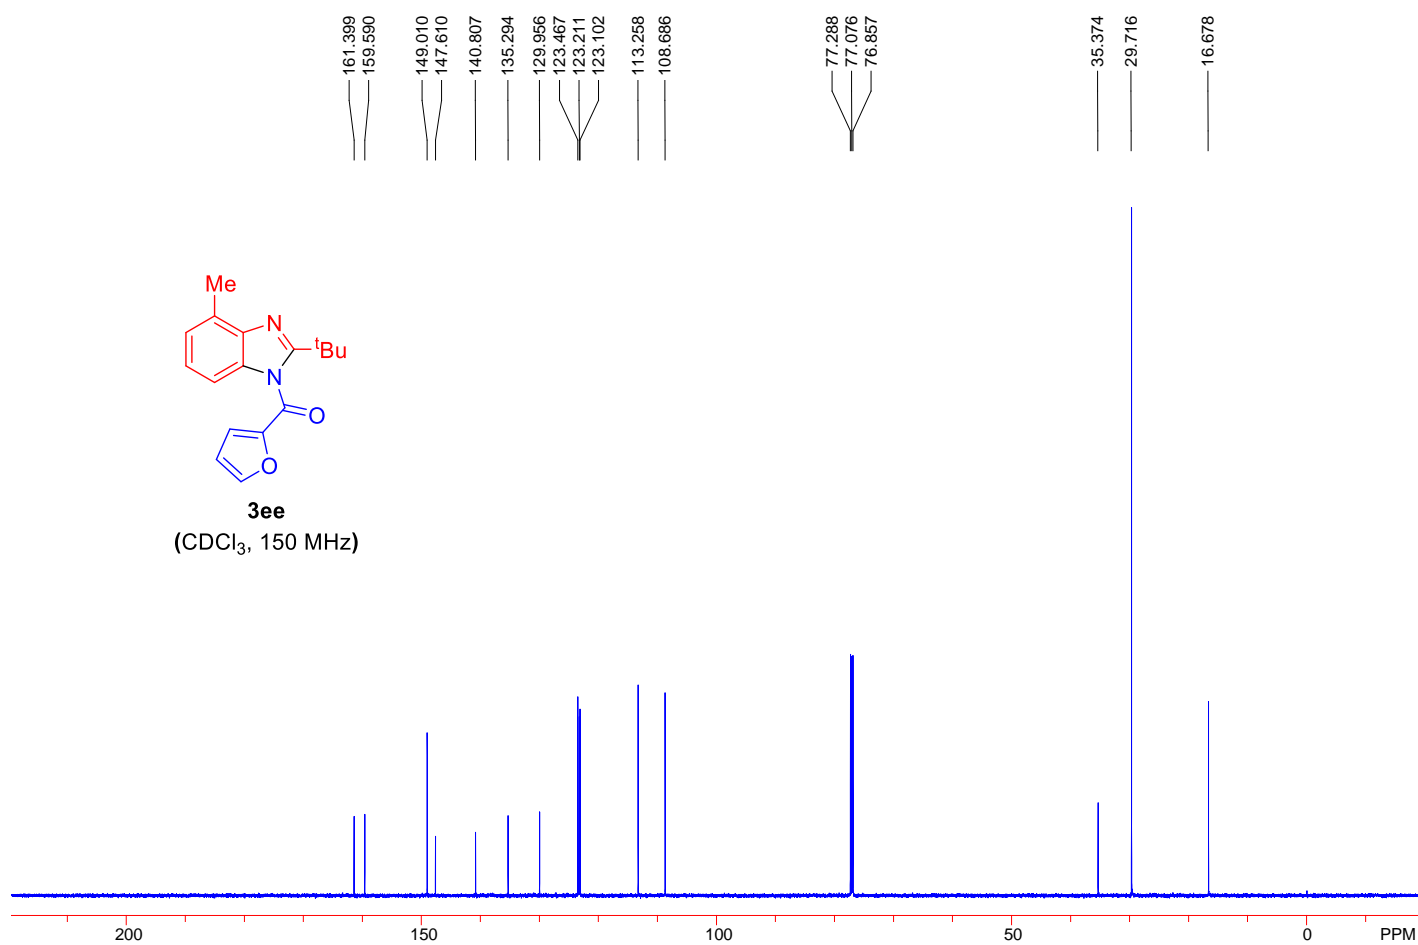

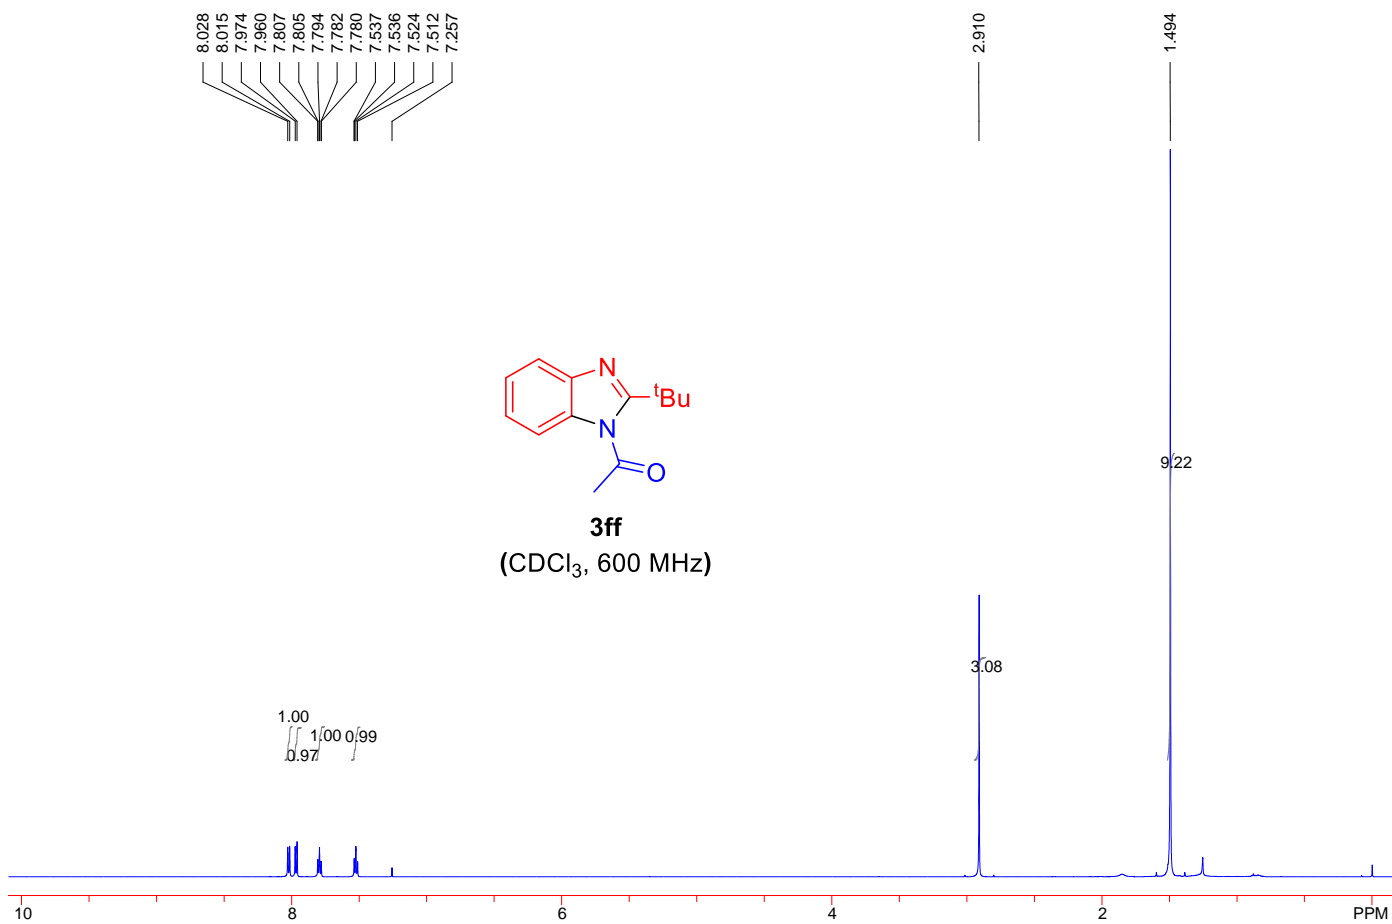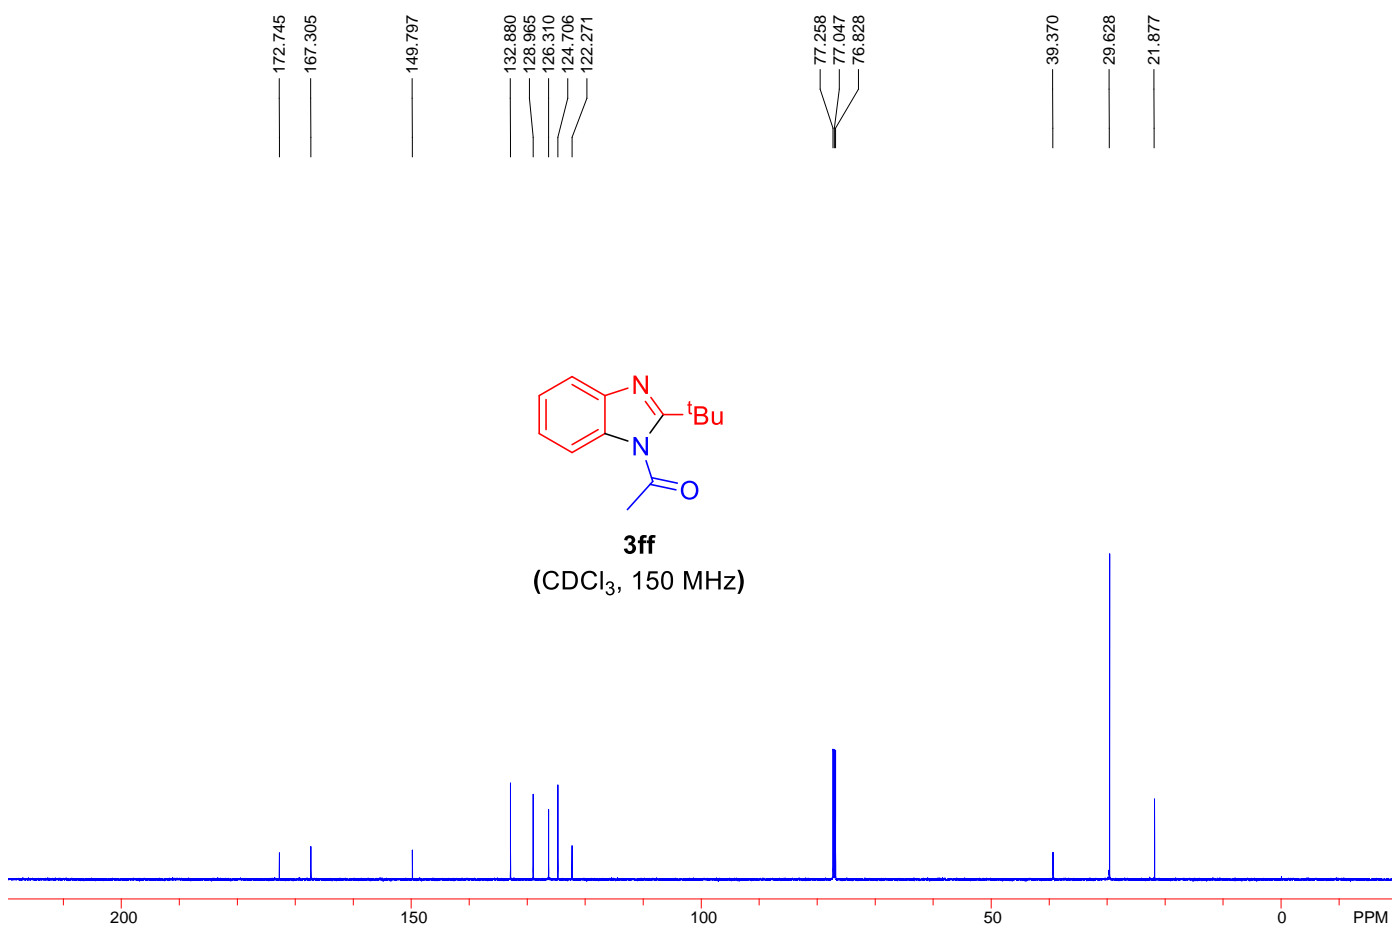

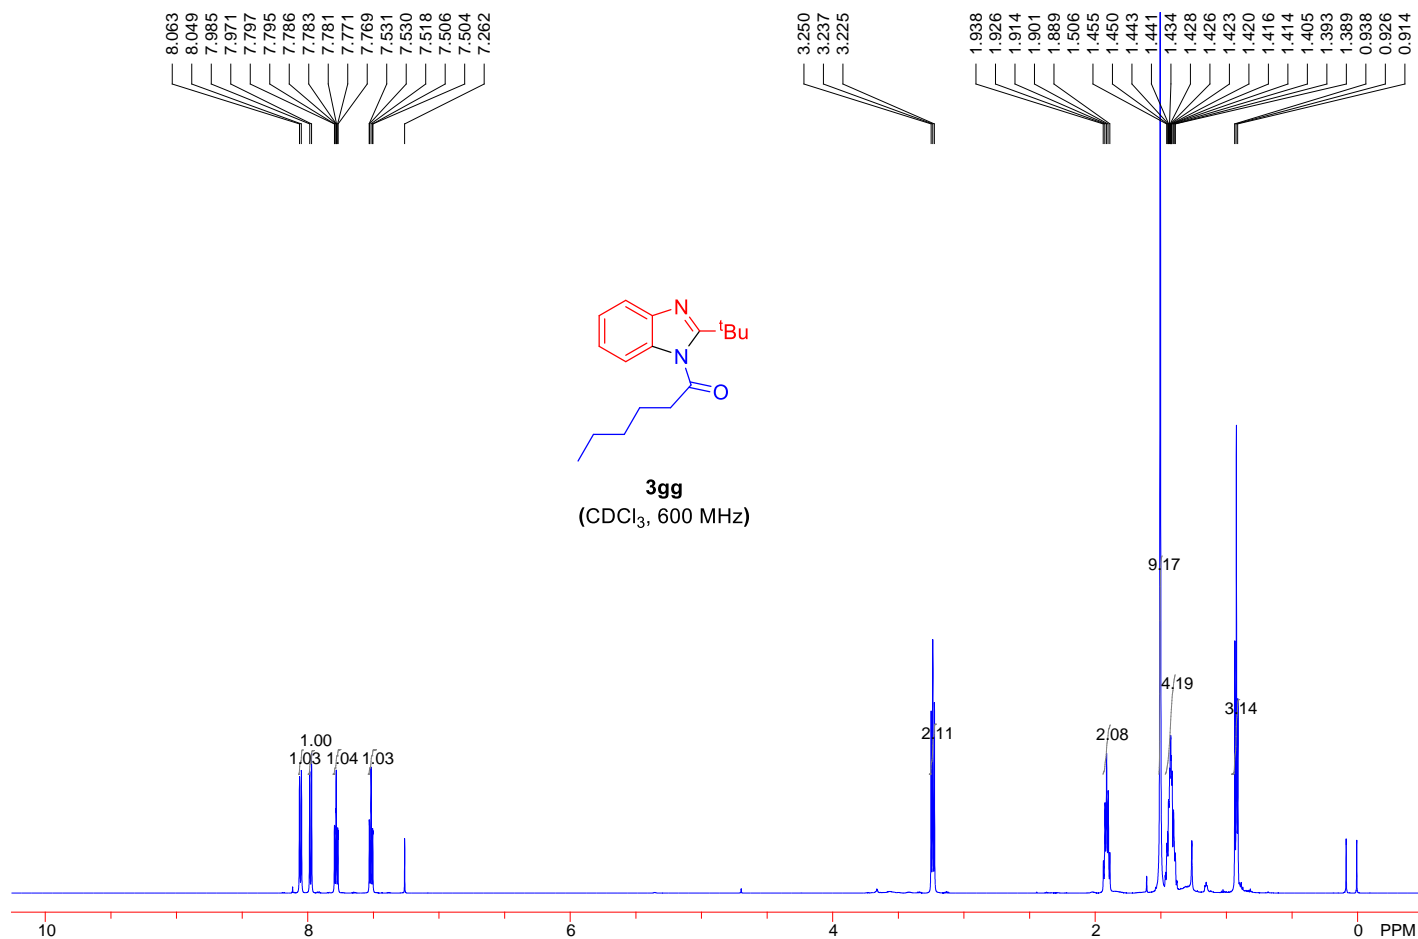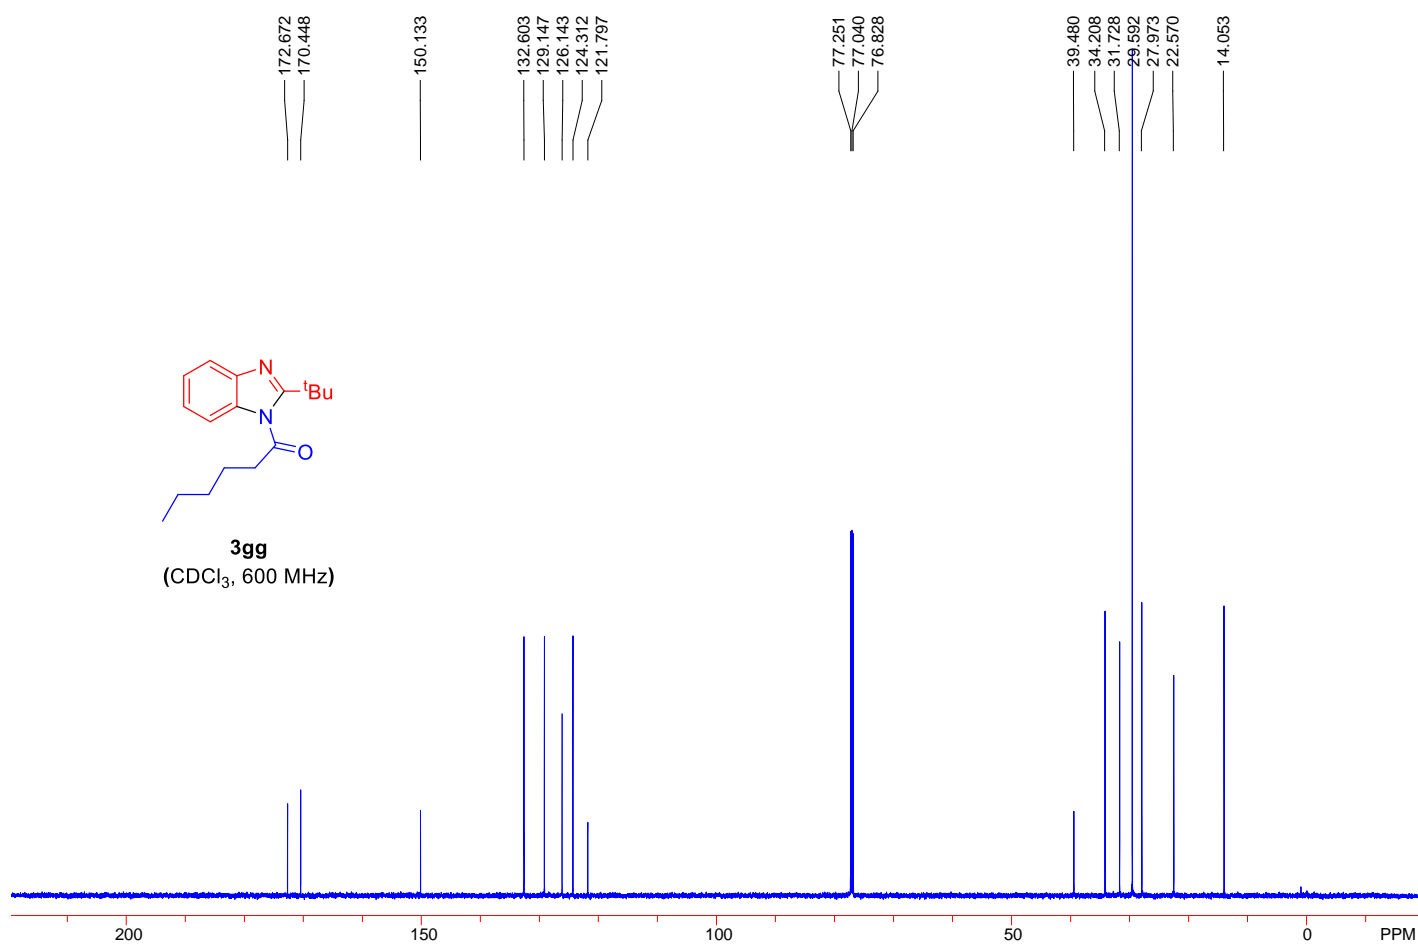

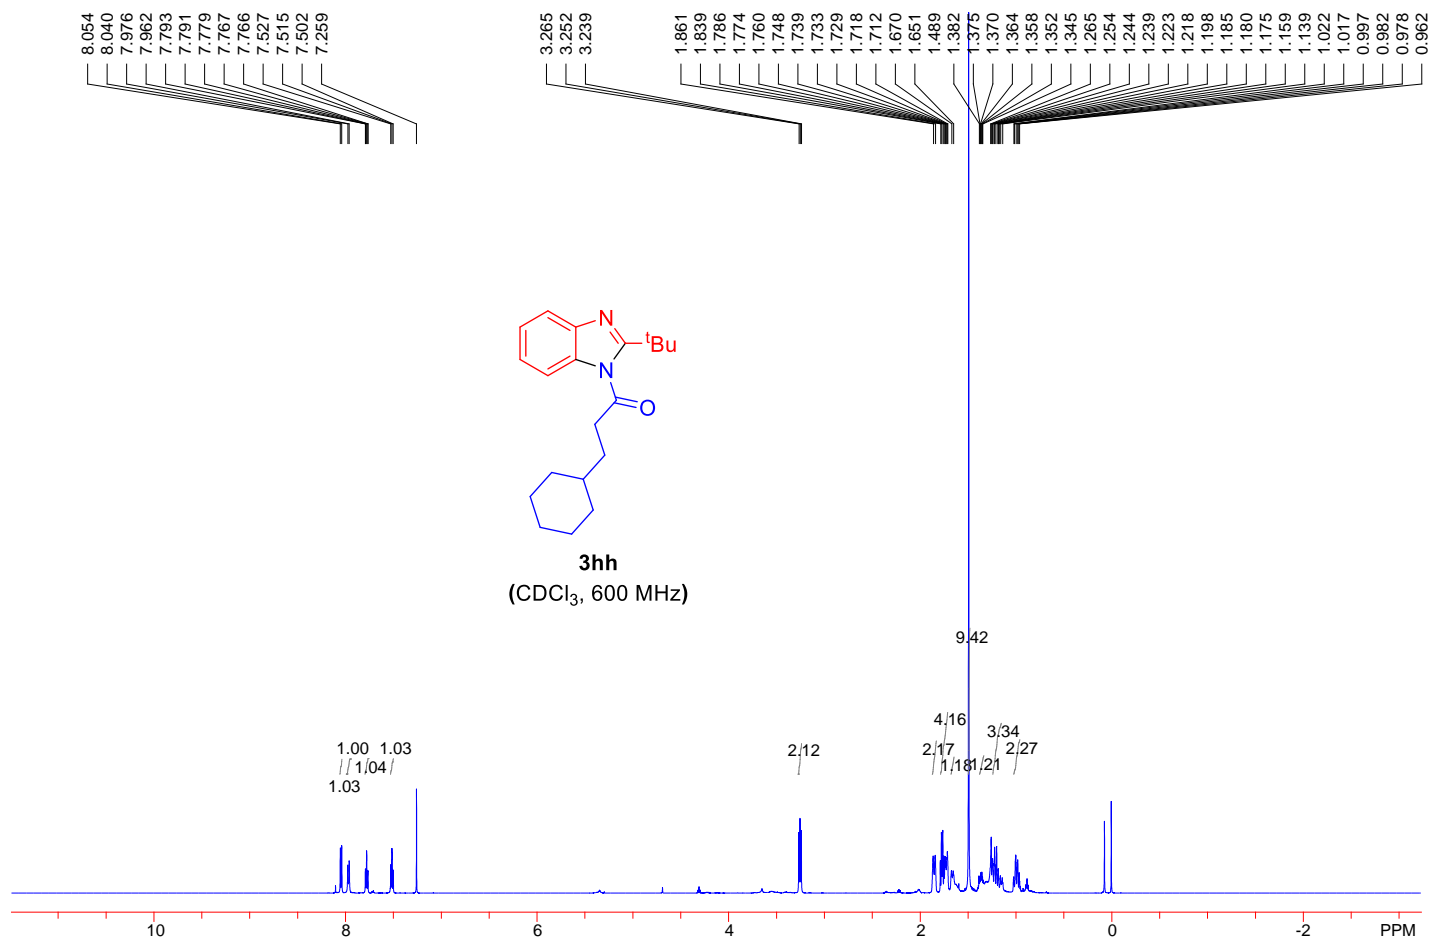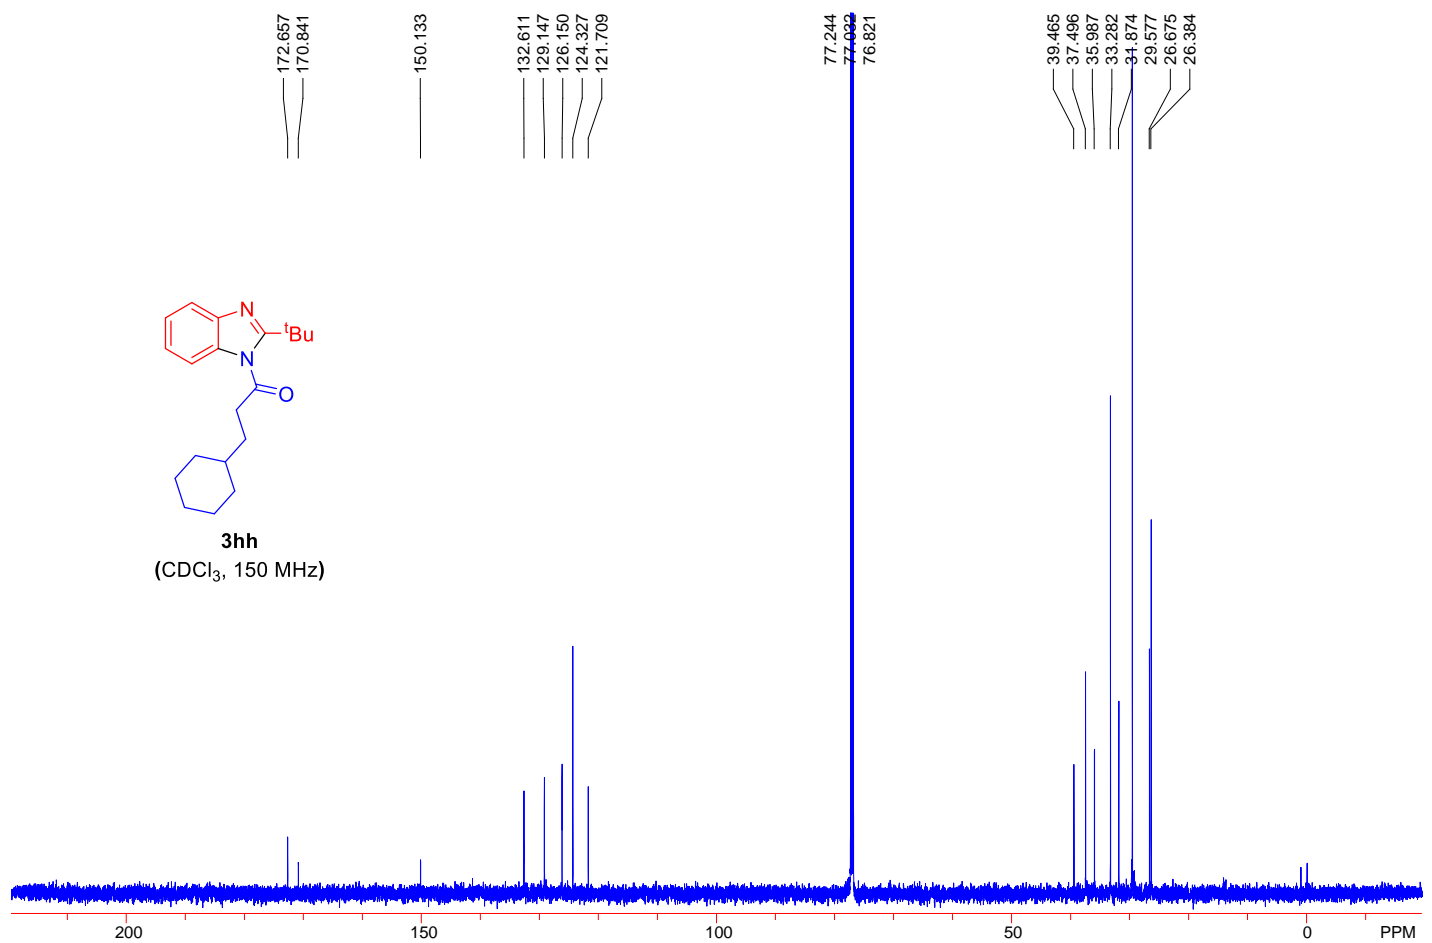

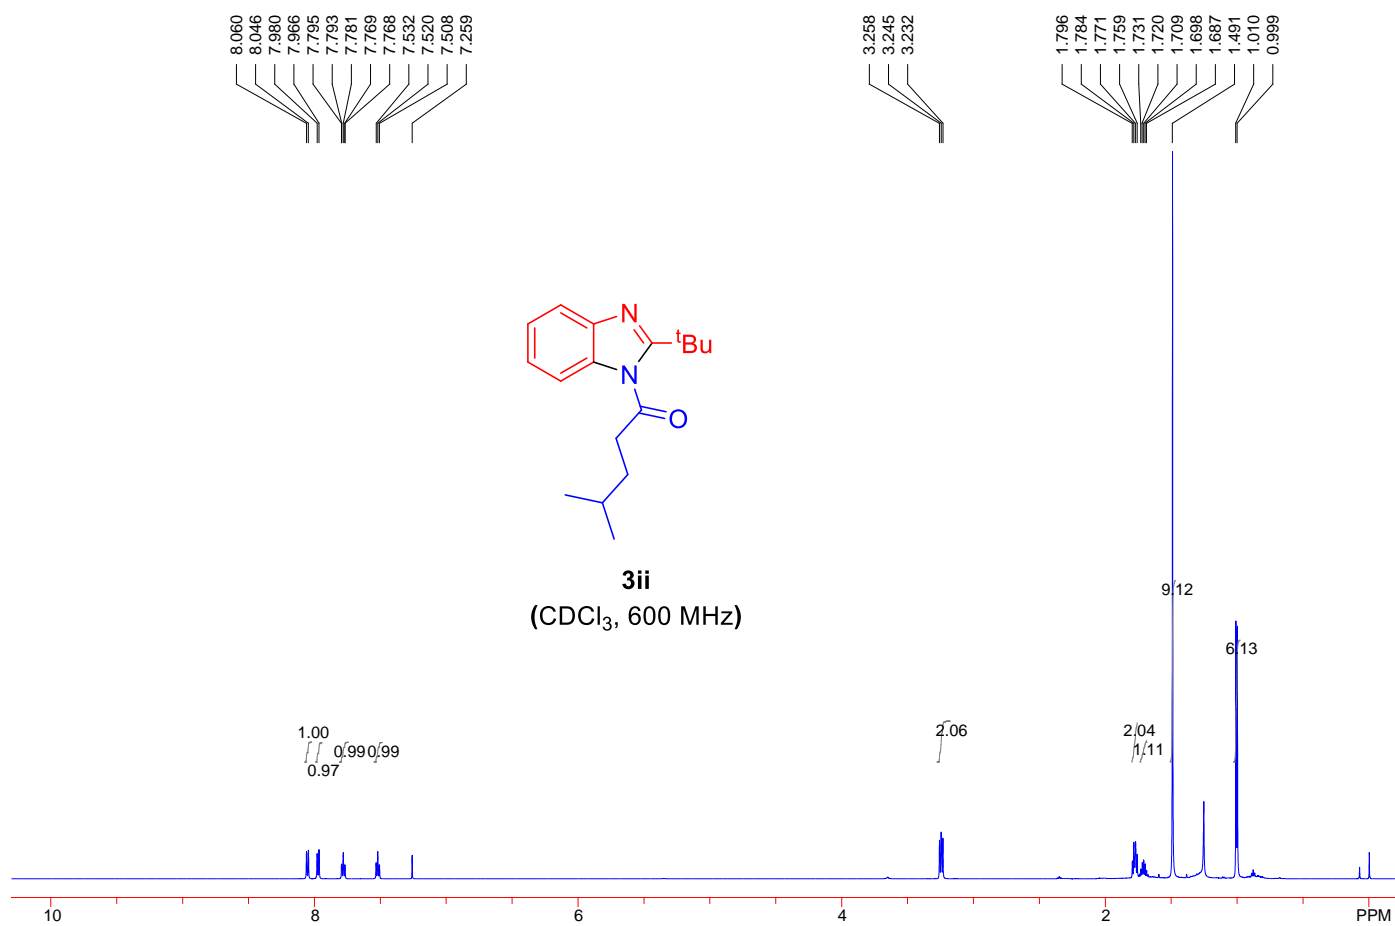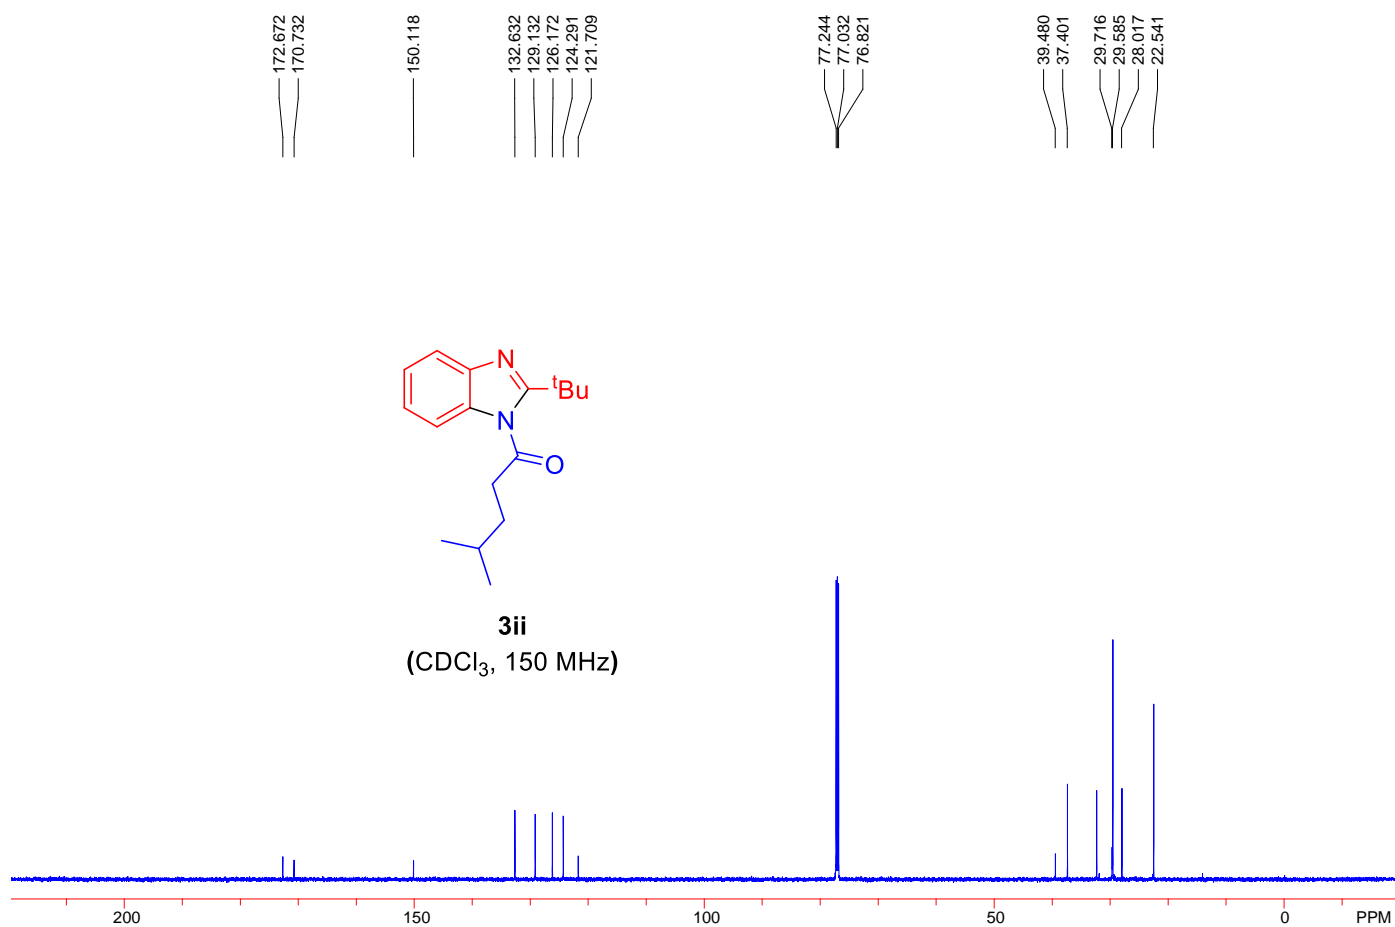

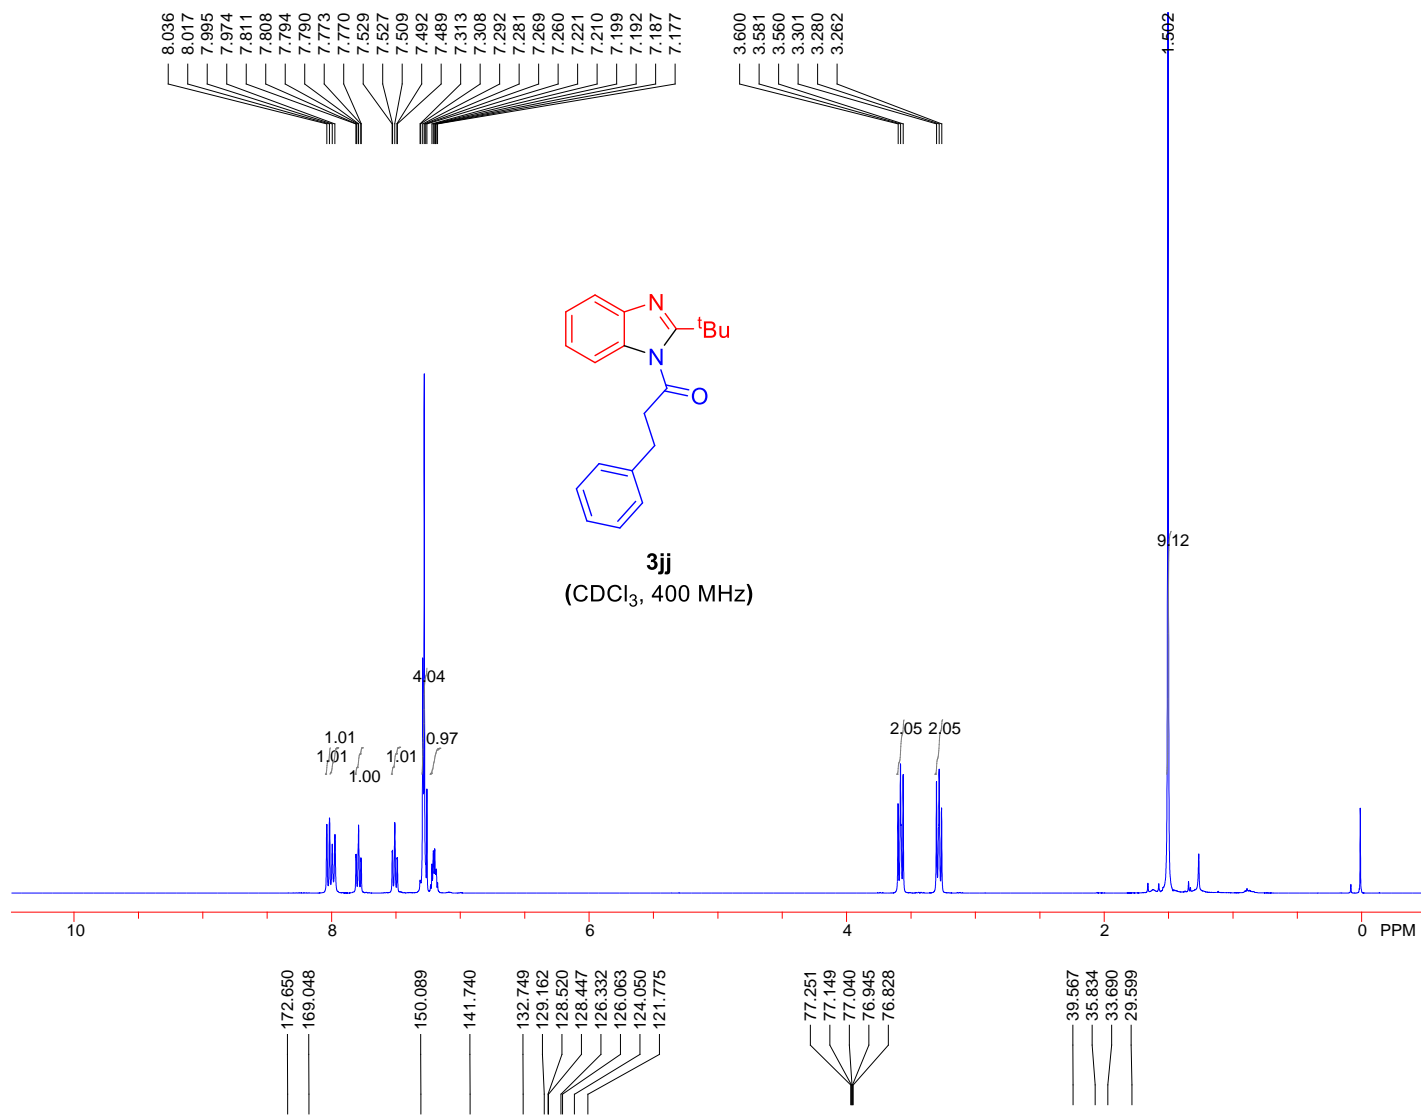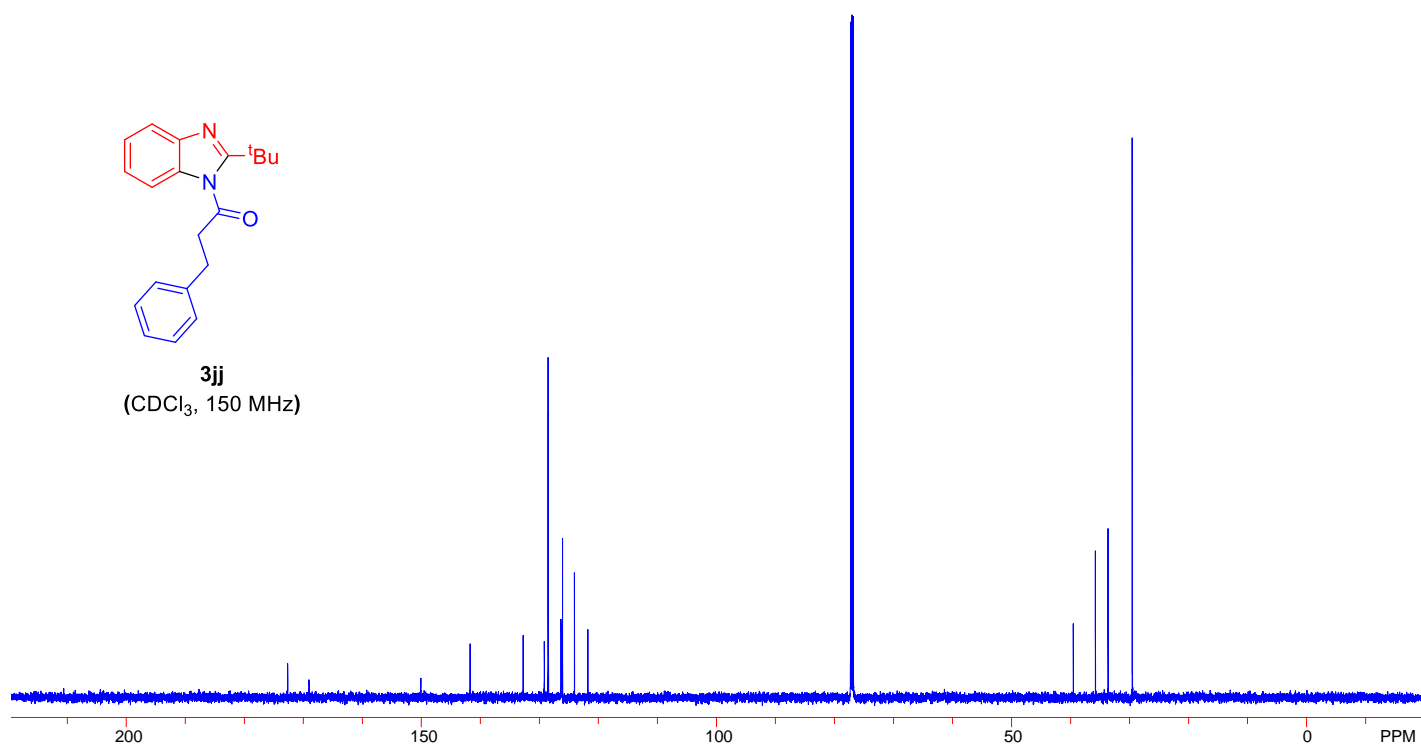

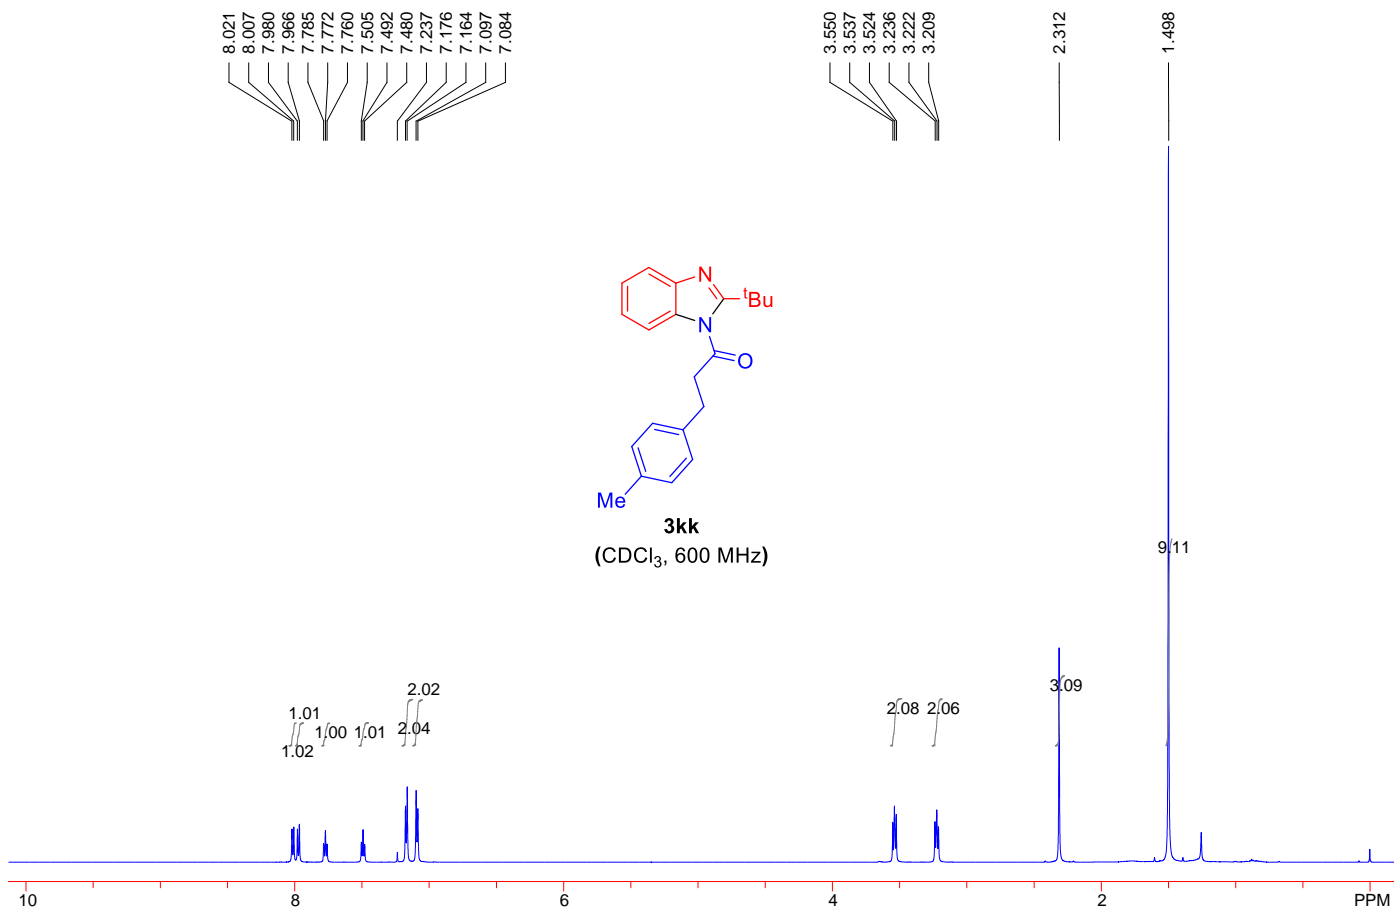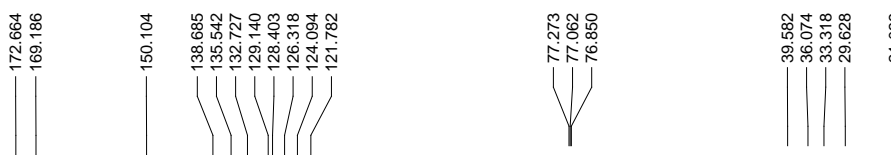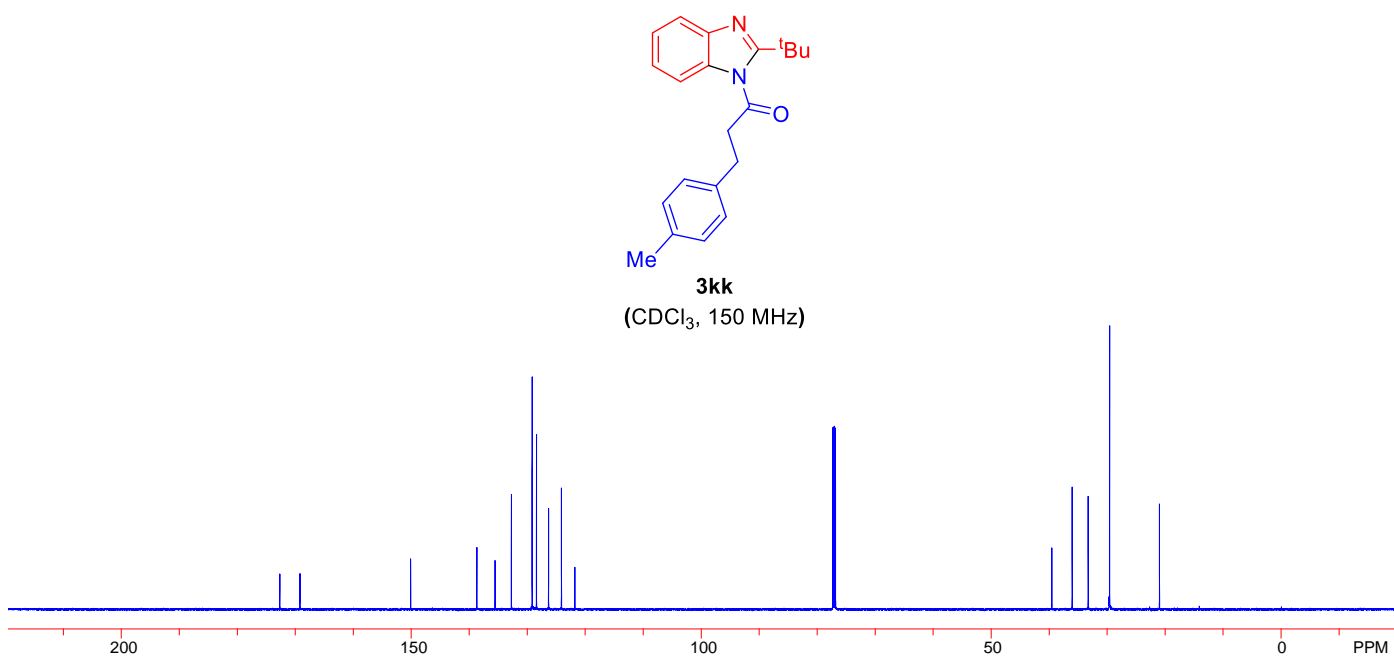



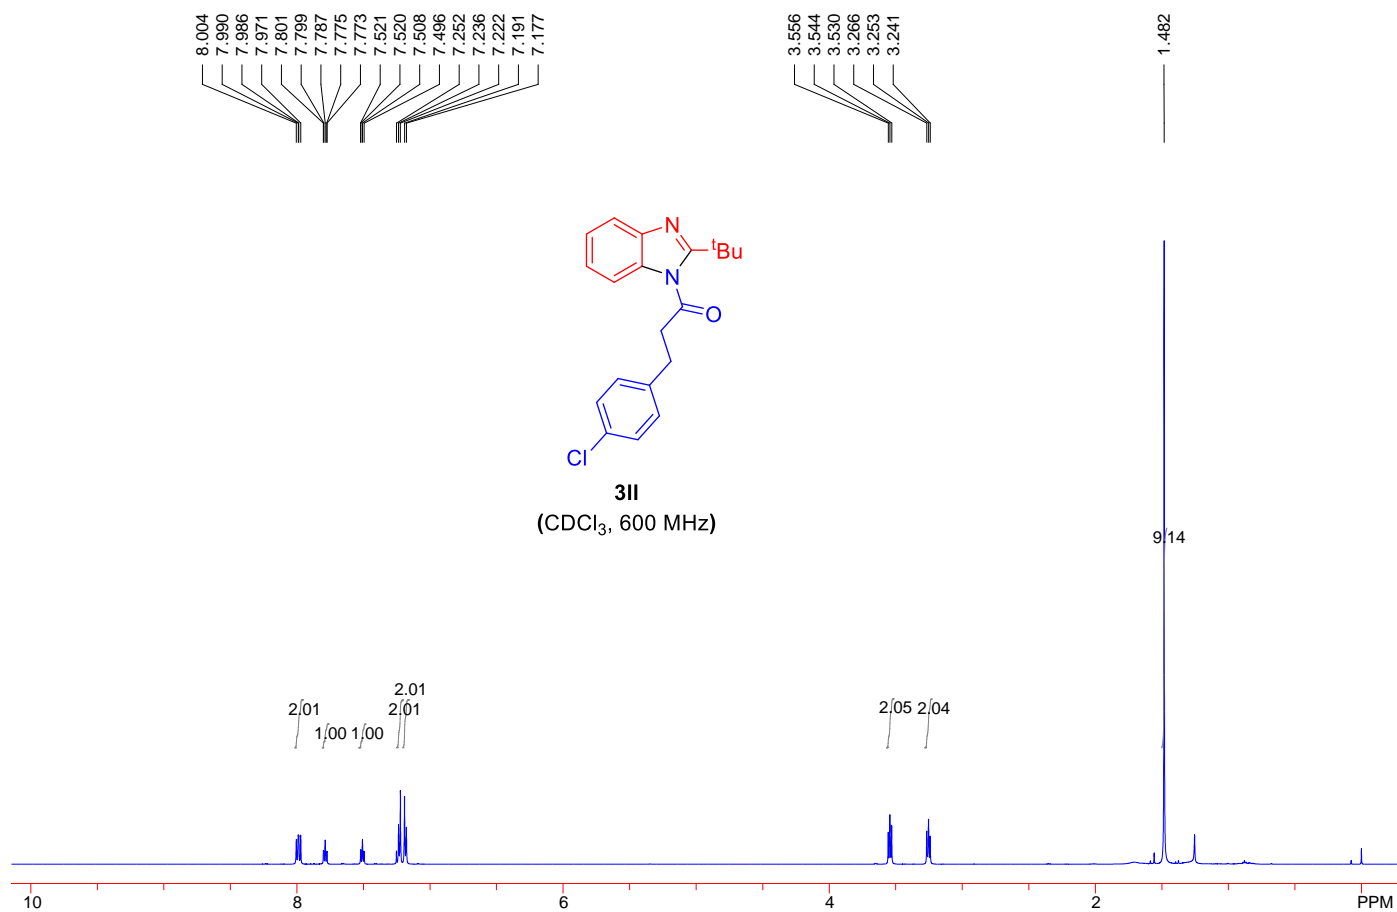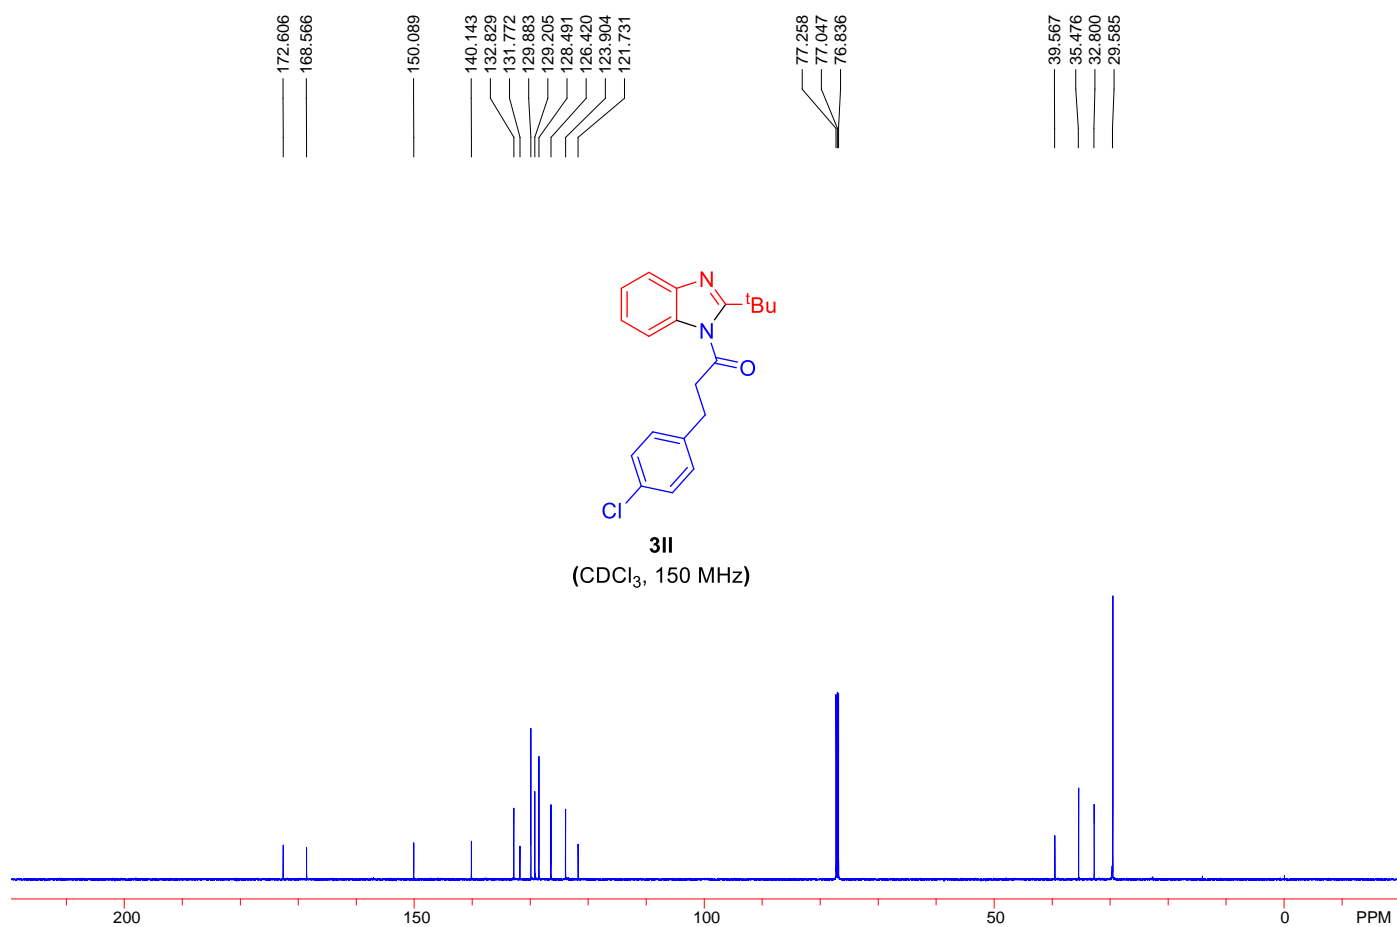

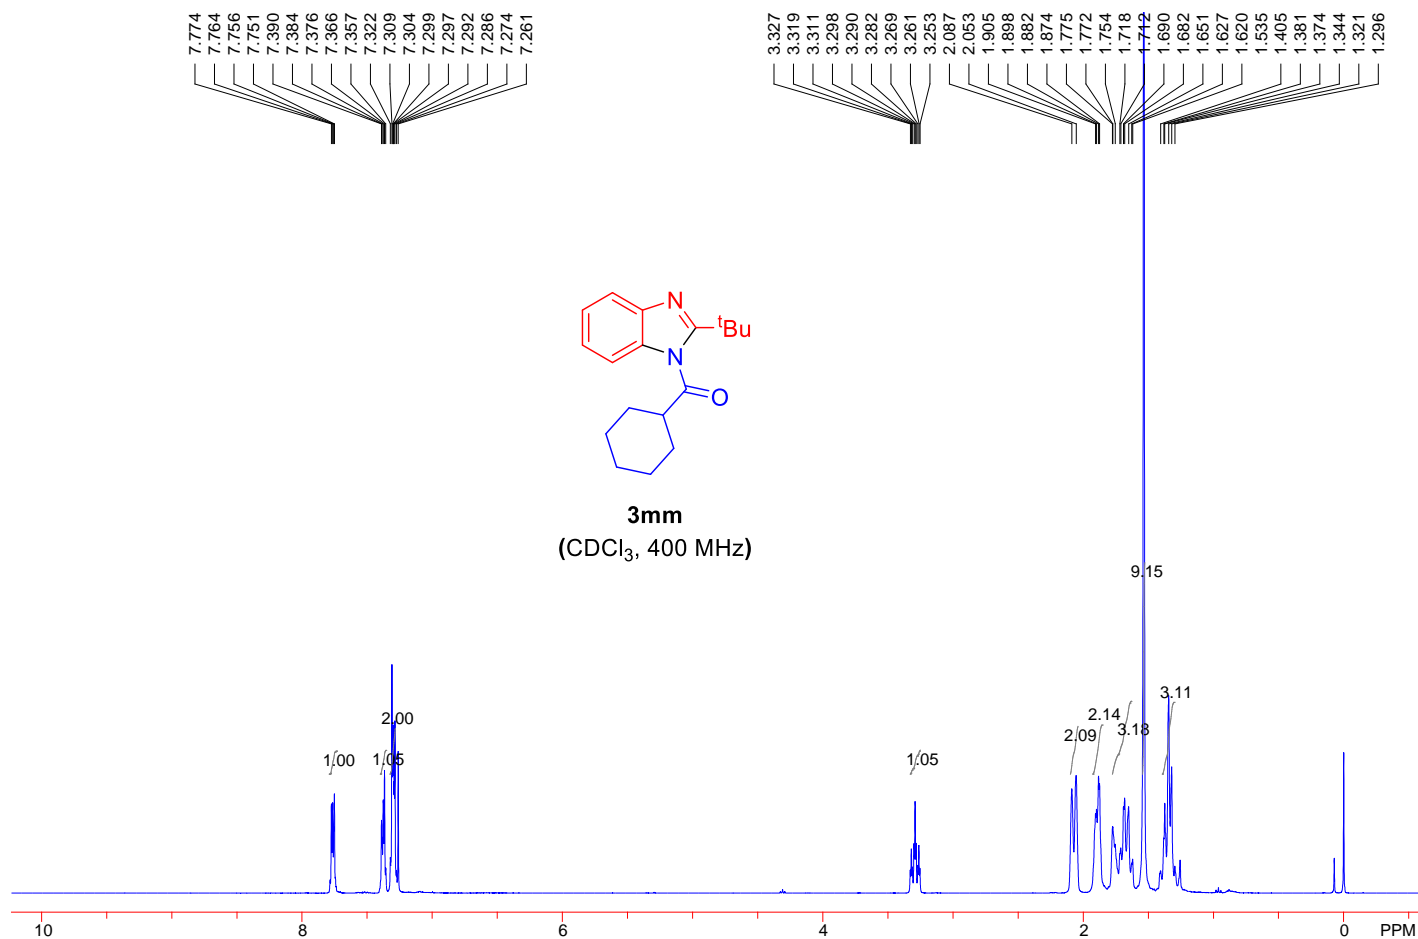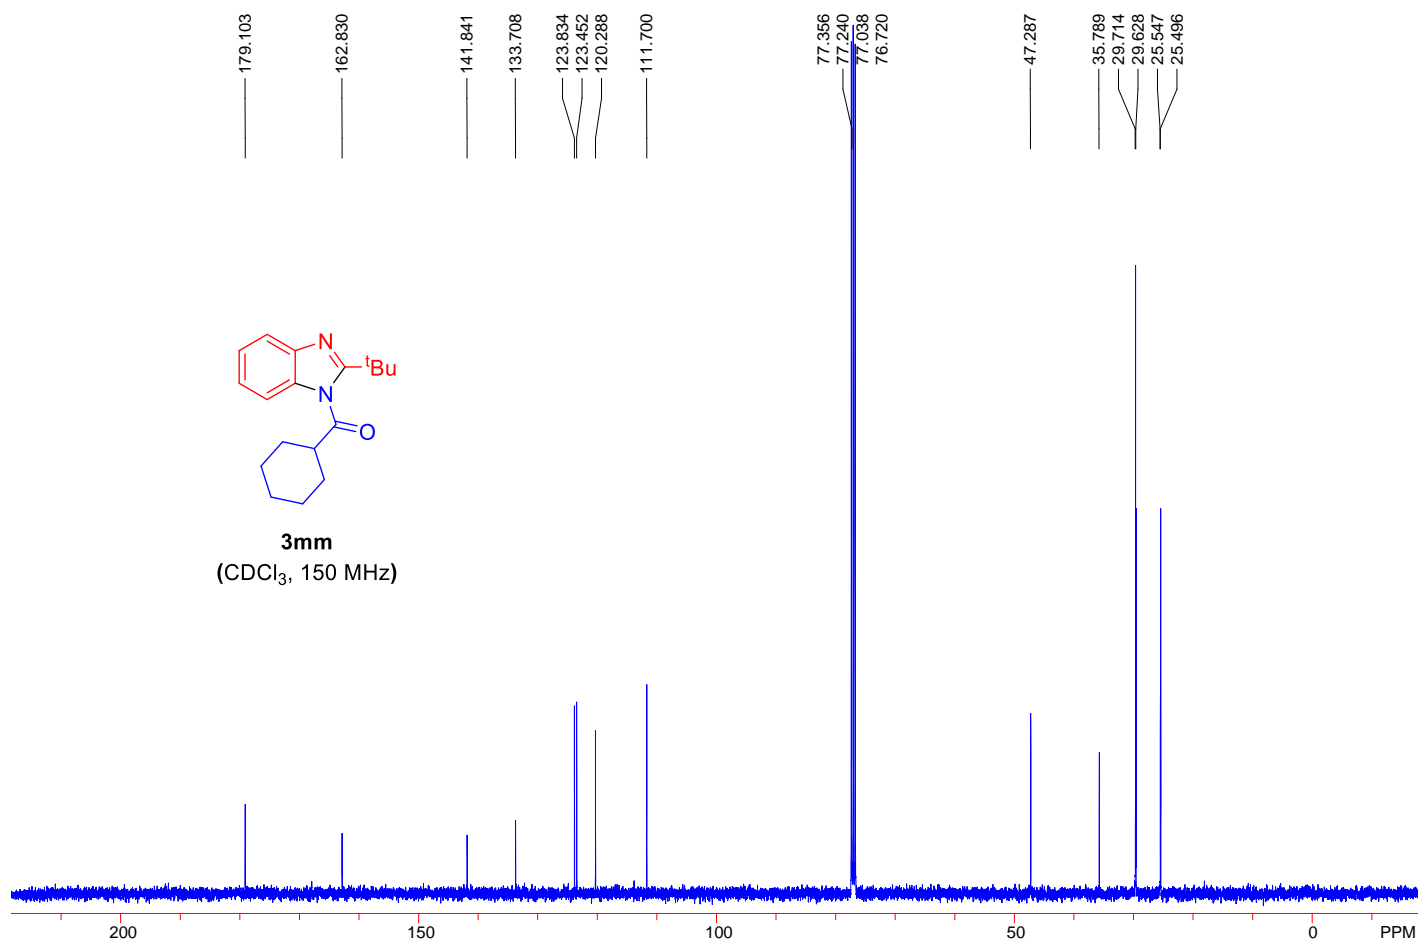

# V Copies of NMR spectra of products 4-7

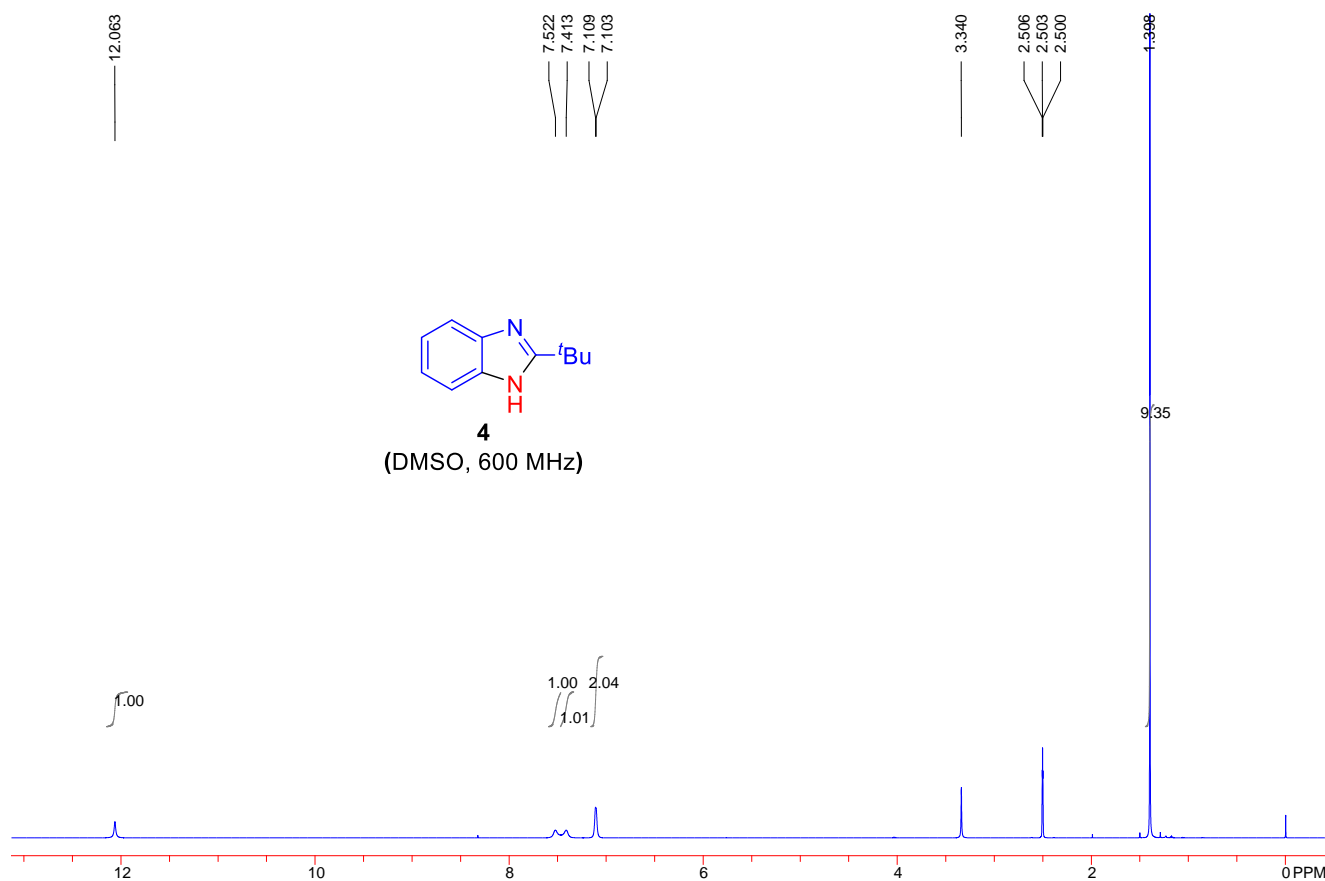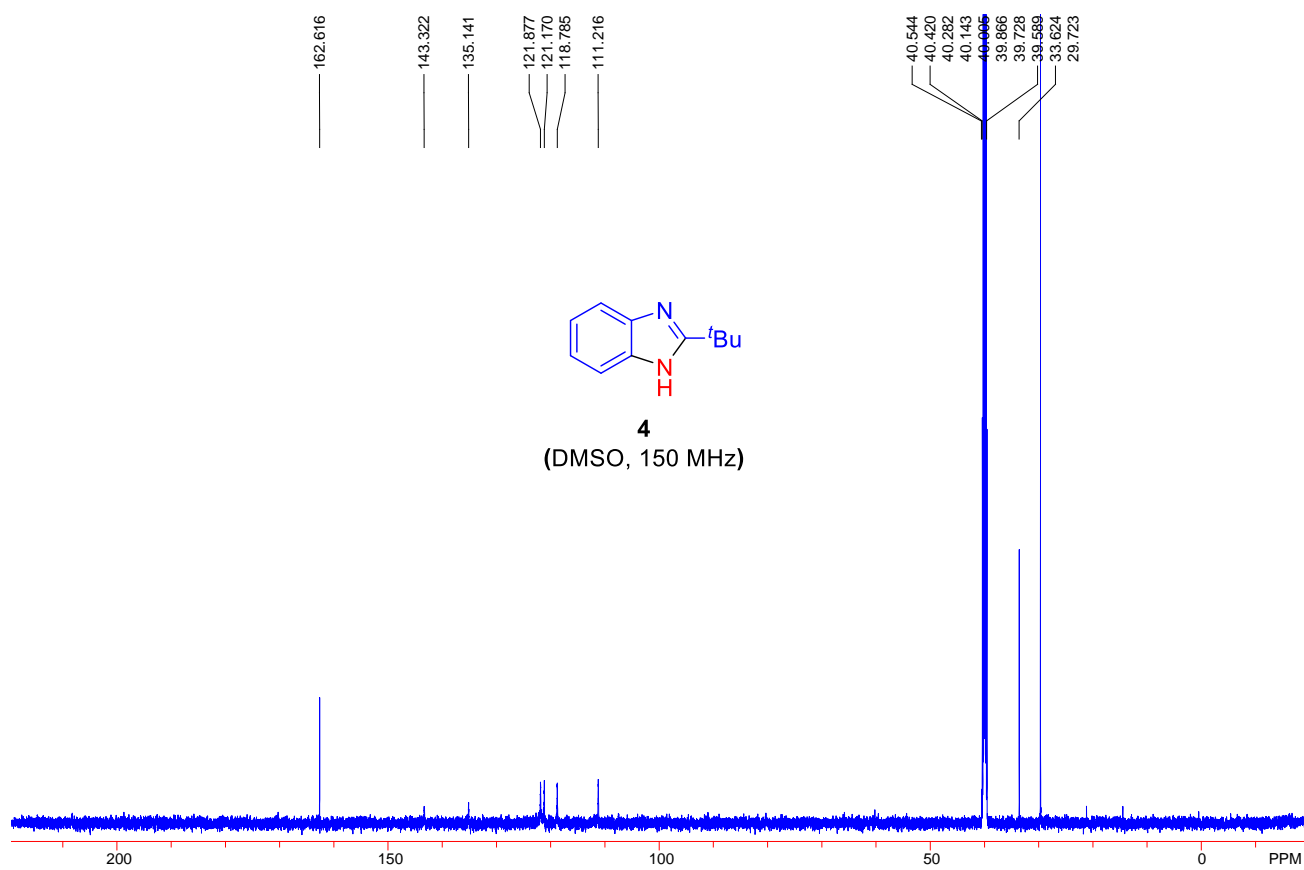

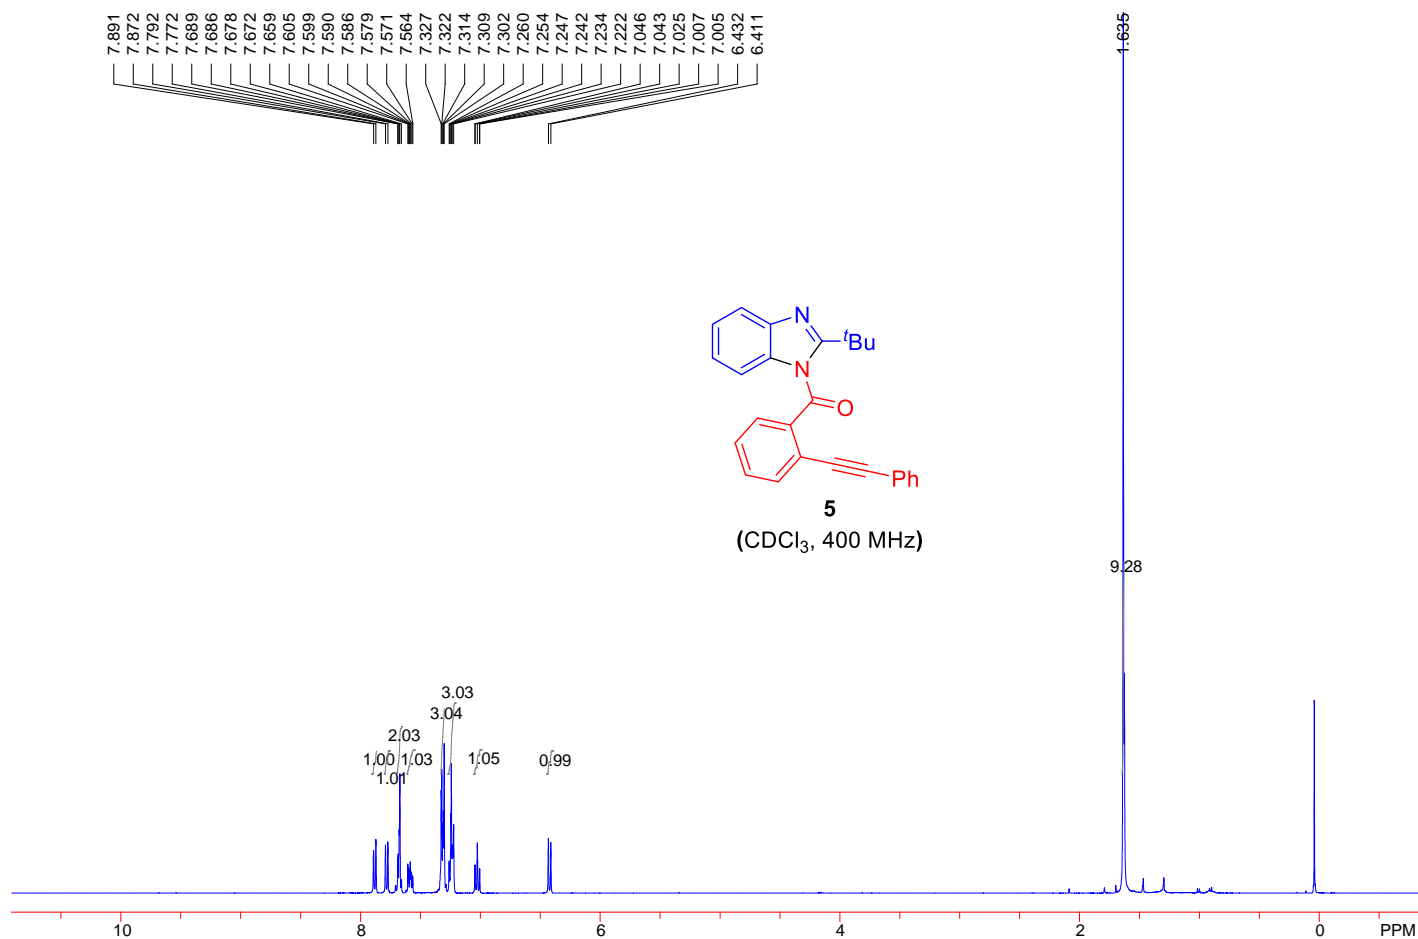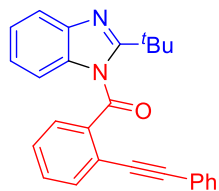

**5**  
(CDCl<sub>3</sub>, 400 MHz)

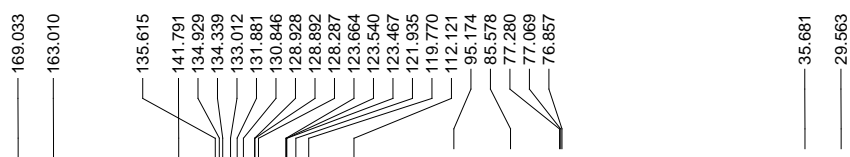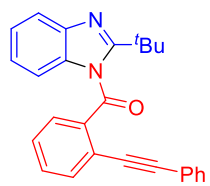

**5**  
(CDCl<sub>3</sub>, 100 MHz)

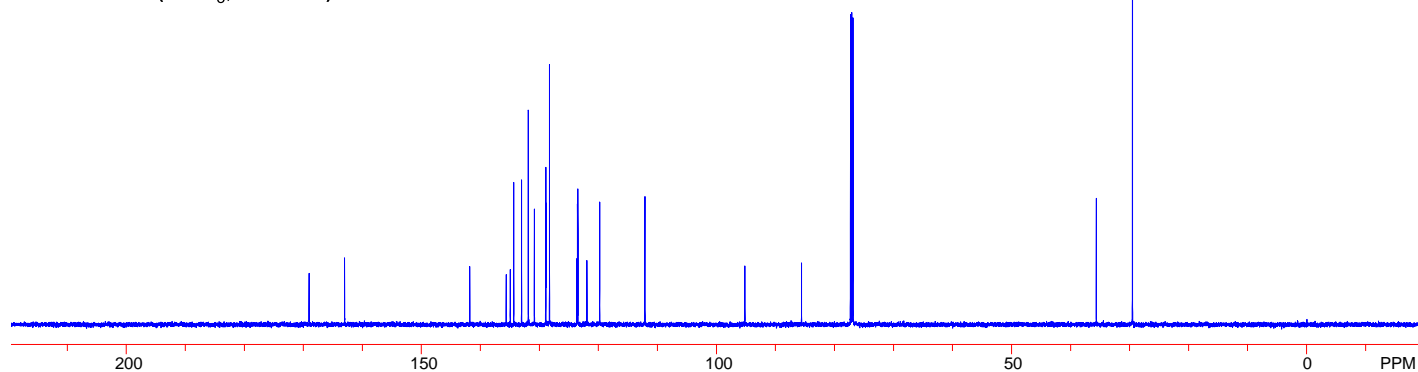

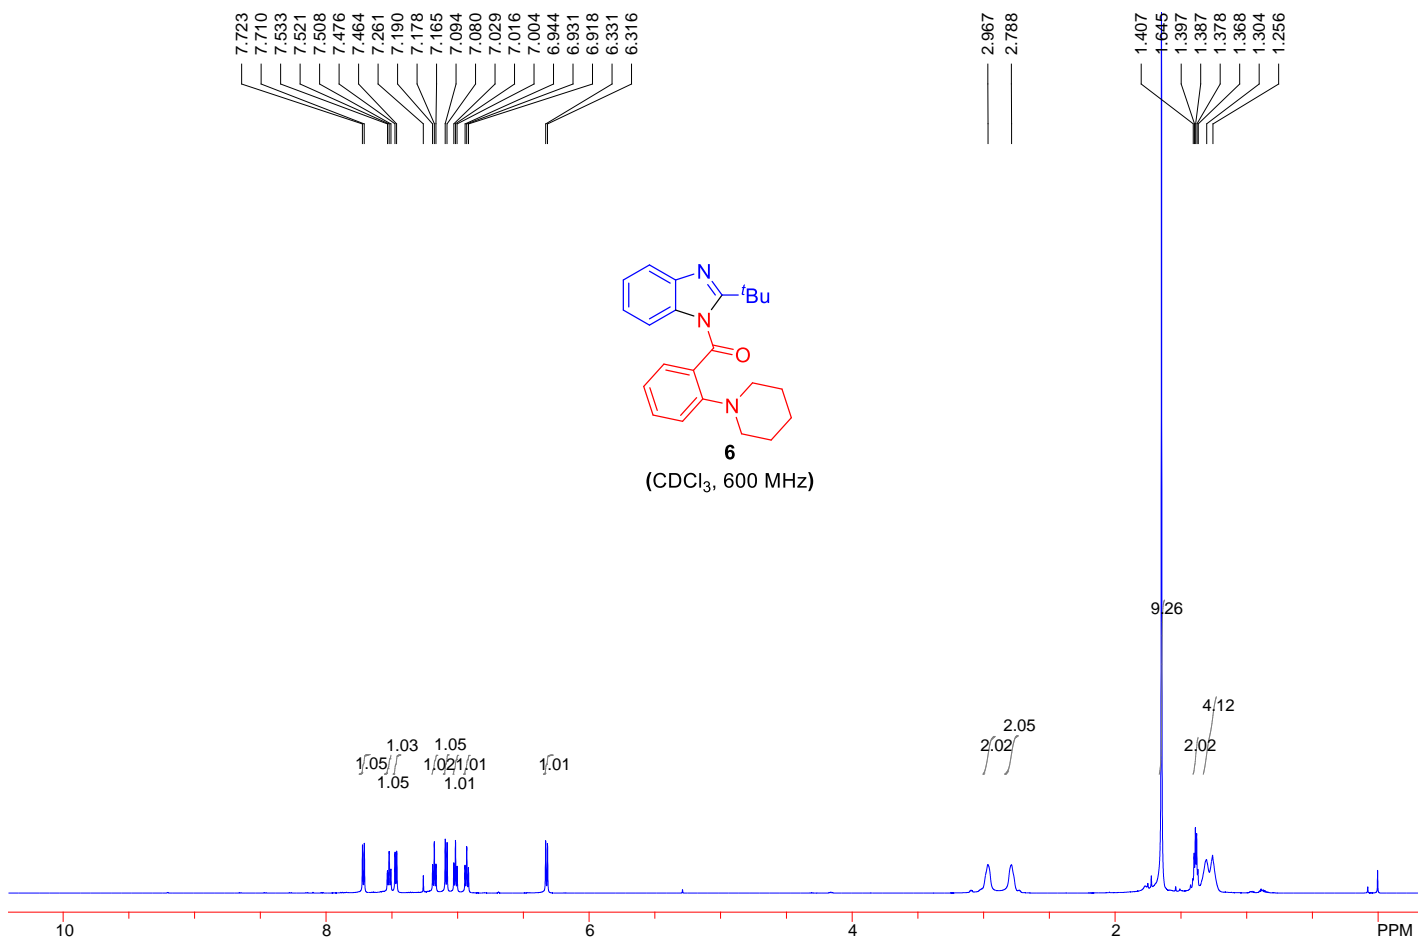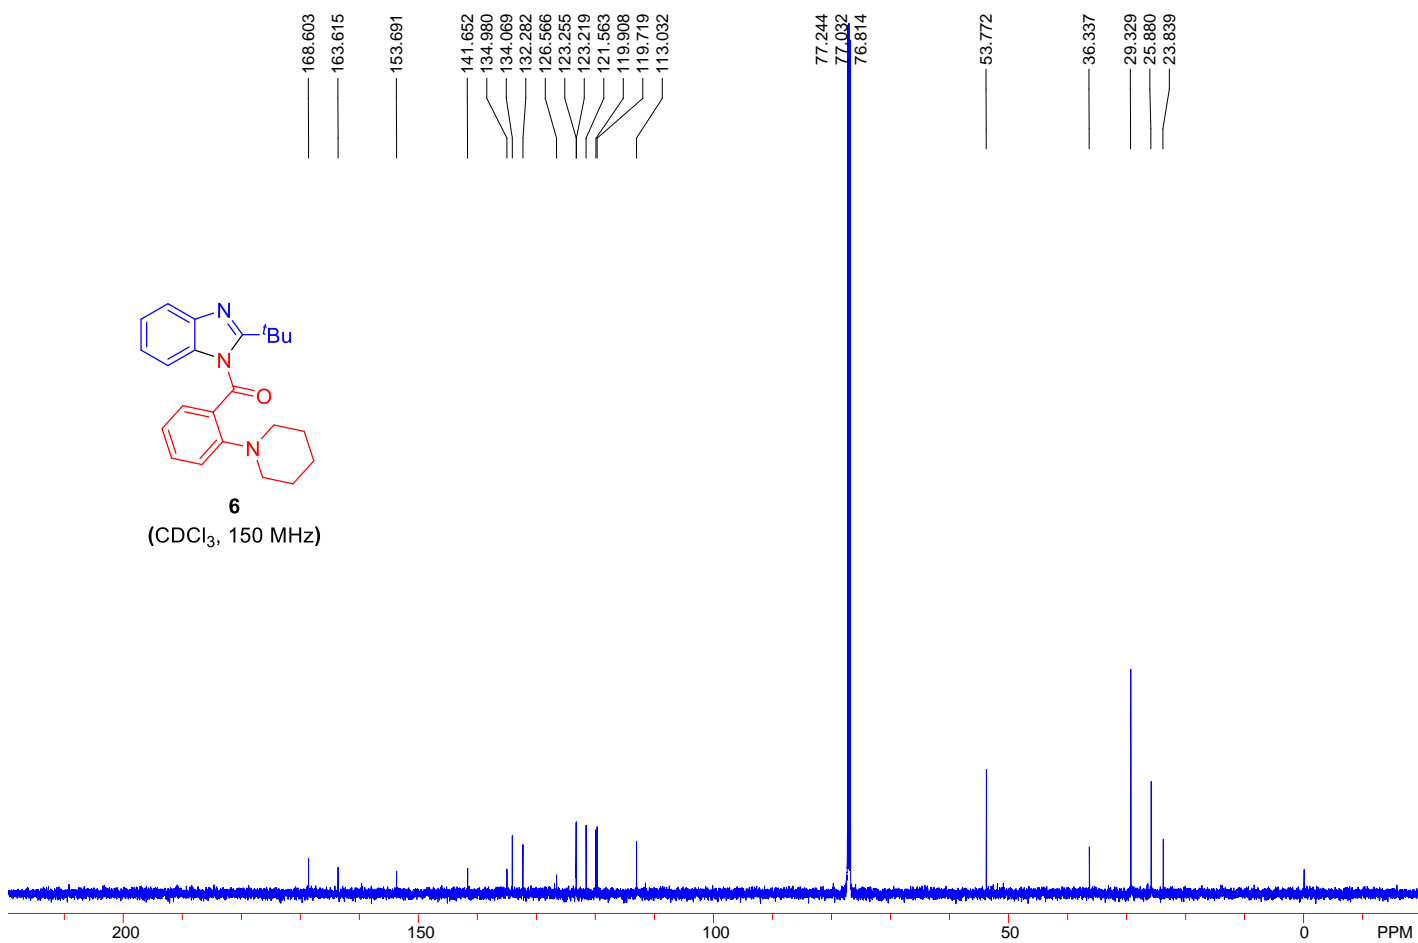

7.689  
7.686  
7.676  
7.674  
7.663  
7.660  
7.659  
7.645  
7.576  
7.574  
7.563  
7.561  
7.504  
7.492  
7.491  
7.481  
7.479  
7.468  
7.466  
7.456  
7.454  
7.256  
7.249  
7.246  
7.244  
7.241  
7.237  
7.227  
7.225  
7.216  
7.213  
7.210  
7.205  
7.204  
7.192  
7.180  
7.178  
7.176  
7.171  
7.169  
7.161  
7.158  
7.156  
7.003  
7.001  
6.989  
6.977  
6.975  
6.311  
6.297  
1.541

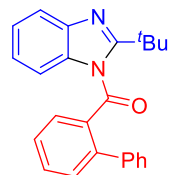

**7**  
(CDCl<sub>3</sub>, 600 MHz)

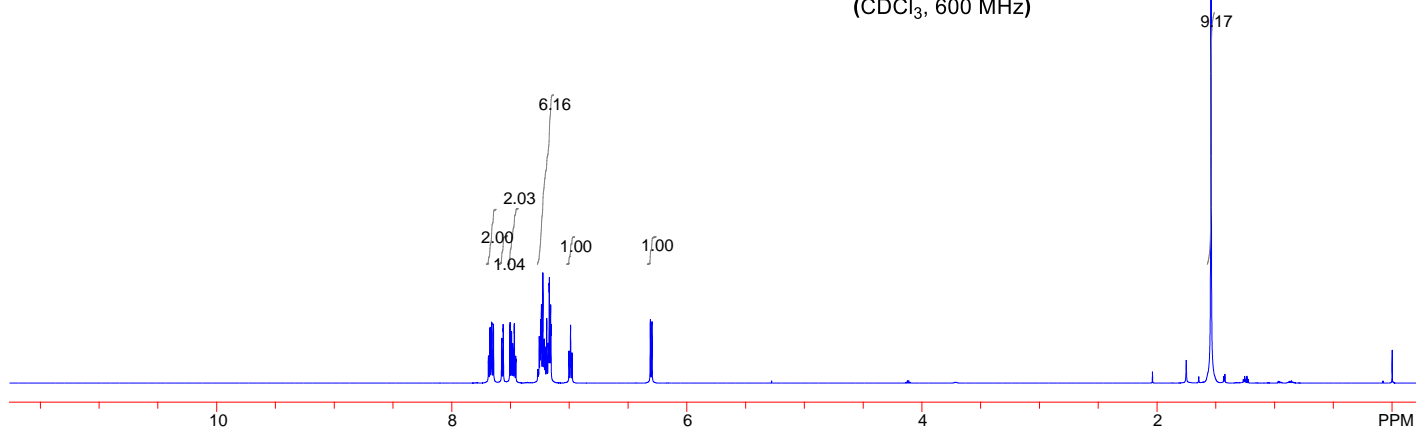

169.062  
163.761  
142.899  
141.733  
139.137  
134.506  
133.996  
132.611  
131.699  
130.007  
128.505  
128.279  
128.024  
127.849  
123.598  
123.532  
119.916  
113.295  
77.280  
77.069  
76.857  
36.162  
29.315

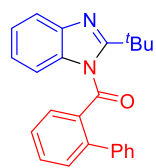

**7**  
(CDCl<sub>3</sub>, 150 MHz)

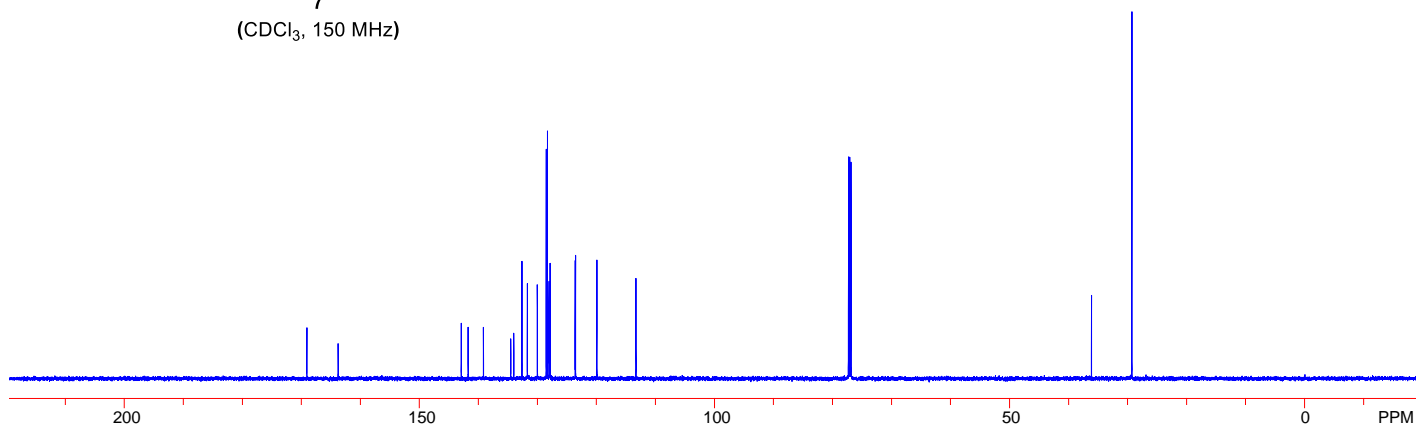

## VI. Copies of NMR spectra of intermediate IV

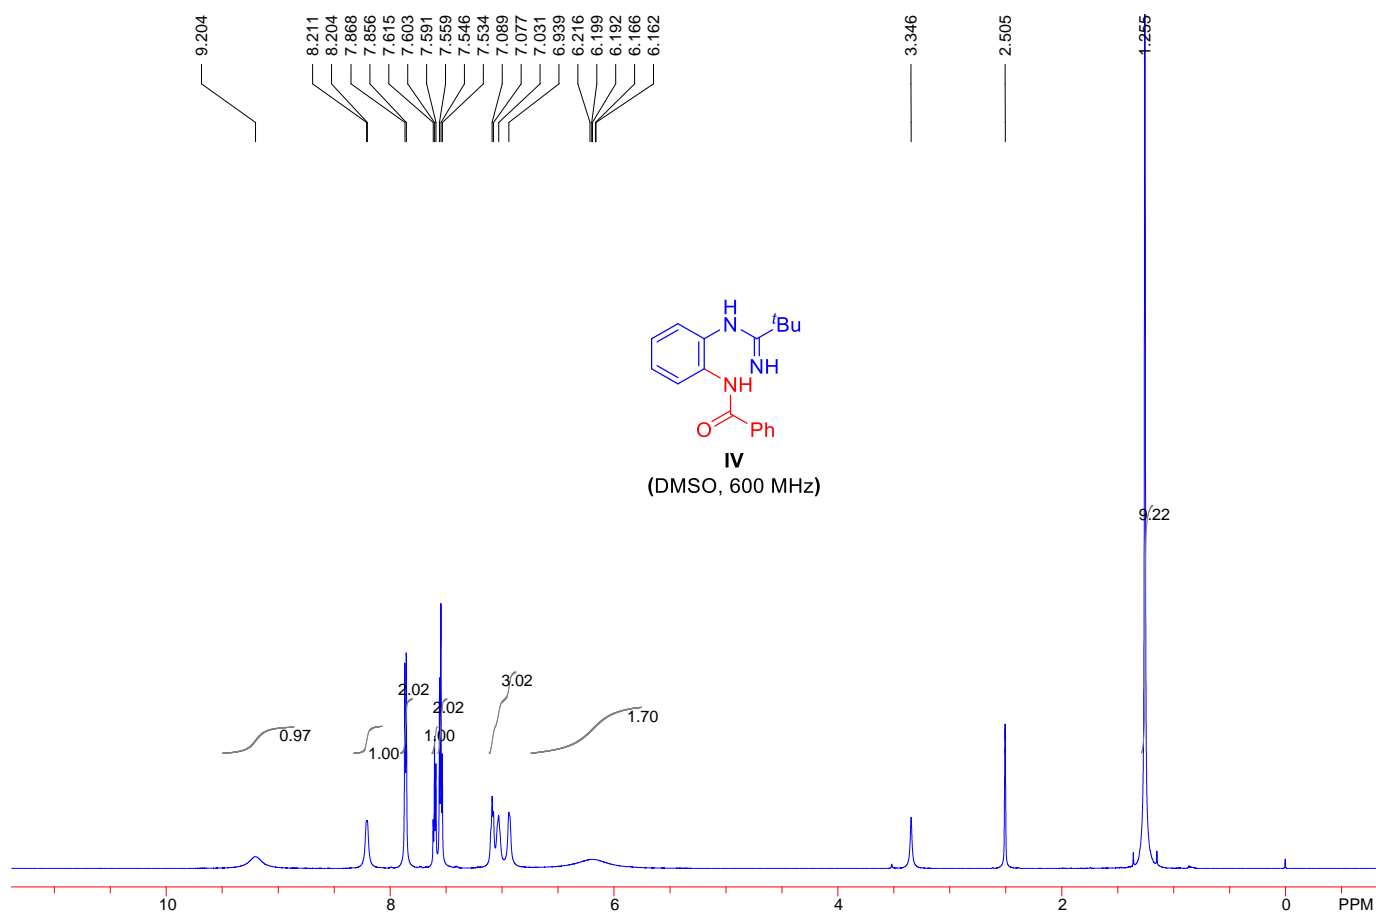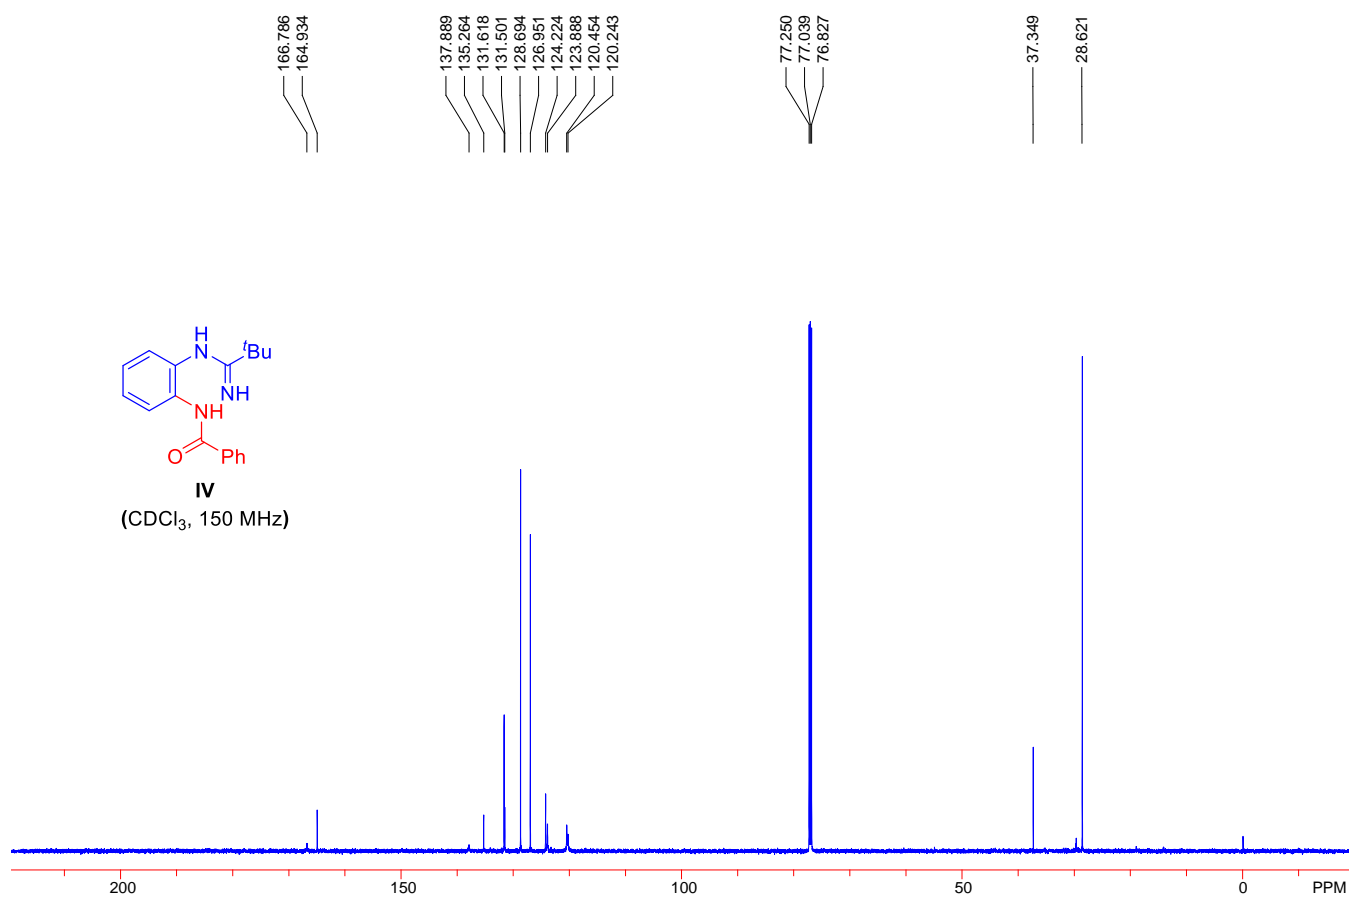

## VII. X-ray crystal structure and data of product **3o**

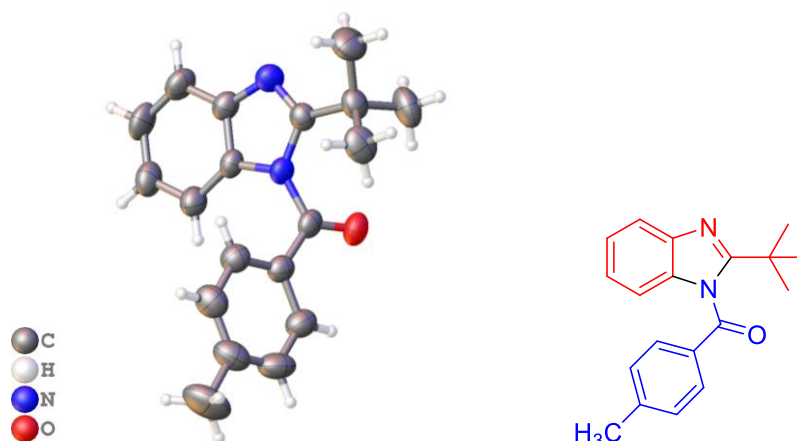

Fig. S1 X-ray crystal structure of **3o** with 50% ellipsoid probability

**X-ray structure determination.** Single crystals suitable for X-ray diffraction were obtained by slow evaporation of the solvent from a petroleum ether/ethyl acetate (8:1) solution of **3o**. Crystal data collection and refinement parameters of **3o** are summarized in Table S1. Intensity data were collected at 293 K on a SuperNova Dual diffractometer using mirror-monochromated Cu K $\alpha$  radiation,  $\lambda = 1.54184$  Å. The data were corrected for decay, Lorentz, and polarization effects as well as absorption and beam corrections based on the multi-scan technique. Using Olex2, the structure was solved with the SHELXS structure solution program using Direct Methods and refined with the SHELXL refinement package using Least Squares minimisation. Nonhydrogen atoms were refined with anisotropic displacement parameters. The H-atoms were either located or calculated and subsequently treated with a riding model.

**Table S1** Crystallographic data and structure refinement results of **3o**

|                   |                                                  |
|-------------------|--------------------------------------------------|
| Empirical formula | C <sub>19</sub> H <sub>20</sub> N <sub>2</sub> O |
| Formula weight    | 292.37                                           |
| Temp, K           | 293 (2)                                          |
| Crystal system    | monoclinic                                       |
| Space group       | P2 <sub>1</sub> /n                               |
| <i>a</i> , Å      | 9.7662(2)                                        |
| <i>b</i> , Å      | 9.2325(2)                                        |
| <i>c</i> , Å      | 18.7919(4)                                       |
| $\alpha$ (°)      | 90                                               |



|                                           |                |
|-------------------------------------------|----------------|
| $\beta$ (°)                               | 101.473(2)     |
| $\gamma$ (°)                              | 90             |
| Volume, Å <sup>3</sup>                    | 1660.54(6)     |
| $Z$                                       | 4              |
| $\rho_{\text{calc}}$ , g cm <sup>-3</sup> | 1.169          |
| $\lambda$ , Å                             | 1.54184        |
| $\mu$ , mm <sup>-1</sup>                  | 0.571          |
| No. of data collected                     | 6499           |
| No. of unique data                        | 3143           |
| $R_{\text{int}}$                          | 0.0189         |
| Goodness-of-fit on $F^2$                  | 1.070          |
| $R_1$ , $wR_2$ ( $I > 2\sigma(I)$ )       | 0.0542, 0.1354 |
| $R_1$ , $wR_2$ (all data)                 | 0.0666, 0.1442 |

## VIII. References

- [1] G. Brasche and S. L. Buchwald, C–H Functionalization/C–N Bond Formation: Copper-Catalyzed Synthesis of Benzimidazoles from Amidines, *Angew. Chem. Int. Ed.*, 2008, **47**, 1932–1934.
- [2] K. M. van Vliet, L. H. Polak, M. A. Siegler, J. I. van der Vlugt, C. F. Guerra and B. Bruin, Efficient Copper Catalyzed Multicomponent Synthesis of *N*-Acyl Amidines via Acyl Nitrenes, *J. Am. Chem. Soc.*, 2019, **141**, 15240–15249.
- [3] K.-I. Fujita, Y. Takahashi, M. Owaki, K. Yamamoto and R. Yamaguchi, Synthesis of Five-, Six-, and Seven-Membered Ring Lactams by Cp\*Rh Complex-Catalyzed Oxidative *N*-Heterocyclization of Amino Alcohols, *Org. Lett.*, 2004, **6**, 2785–2788.
- [4] J. Romero-Parra, J. Mella-Raipan, V. Palmieri, M. Allara, M. J. Torres, H. Pessoa-Mahana, P. rriaga-Vasquez, R. Escobar, M. Faúndez, V. Di Marzo and C. D. Pessoa-Mahana, Synthesis, Binding Assays, Cytotoxic Activity and Docking Studies of Benzimidazole and Benzothiophene Derivatives with Selective Affinity for the CB2 Cannabinoid Receptor, *Eur. J. Med. Chem.*, 2016, **124**, 17–35.
- [5] Z.-J. Zhang, Y.-H. Wen, J. Song and L.-Z. Gong, Kinetic Resolution of Aziridines Enabled by *N*-Heterocyclic Carbene/Copper Cooperative Catalysis: Carbene Dose-Controlled Chemo-Switchability, *Angew. Chem. Int. Ed.*, 2021, **60**, 3268–3276.
- [6] J. Huang, Y. He, Y. Wang and Q. Zhu, Synthesis of Benzimidazoles by PIDA-Promoted Direct C(sp<sup>2</sup>)–H Imidation of *N*-Arylamidines, *Chem. Eur. J.*, 2012, **18**, 13964–13967.
- [7] X. Song, Q. Zhou, J. Zhao, Y. Jiang, X. Zhang, X. Zhang and X. Fan, Synthesis of 1,3-Benzodiazepines through [5 + 2] Annulation of *N*-Aryl Amidines with Propargylic Esters, *Org. Lett.*, 2020, **22**, 9506–9512.
- [8] D. J. Burns and H. W. Lam, Catalytic 1,4-Rhodium(III) Migration Enables 1,3-Enynes to Function as One-Carbon Oxidative Annulation Partners in C–H Functionalizations, *Angew. Chem. Int. Ed.*, 2014, **126**, 10089–10093.

- [9] X. Song, C. Gao, X. Zhang and X. Fan, Synthesis of Diversely Functionalized 2*H*-Chromenes through Pd-Catalyzed Cascade Reactions of 1,1-Dibromoolefin Derivatives with Arylboronic Acids, *J. Org. Chem.*, 2018, **83**, 15256–15267.
